# Supplementary material for: Repurposing a Detrimental Antibody Epitope as Targeted Therapeutics for Sepsis and Rheumatoid Arthritis.
Source: Research Square preprint supplement (doi:10.21203/rs.3.rs-7633404/v1), 2025-09-19
Supplement: Supplementary file 1 [file e71a3fdf41b98457a1f5b3ce.xlsx]

## Sheet: Fig. 3
		Effect of P-2-1 on CLP-induced Cytokines /chemokines
		BLC
		Control	CLP	CLP + P2-1 (0.1)	CLP + P2-1 (1.0)
		6	140.9	202.1	33.1
		7.9	226.5	204.2	30.9
		7	189.4	224.3	35.4
		5.4	190.1	257.4	42.8
		G-CSF
		Control	CLP	CLP + P2-1 (0.1)	CLP + P2-1 (1.0)
		45.4	285.8	161.4	111.9
		42.2	310.1	173.4	128.7
		44.7	289.3	290.4	120.4
		34.5	349.2	305.7	100.4
		GM-CSF
		Control	CLP	CLP + P2-1 (0.1)	CLP + P2-1 (1.0)
		0	35.5	23.2	0.79
		0	39.4	56	1.5
		0	40.8	52.8	1.2
		0	52.2	13.6	3.4
		IL-6
		Control	CLP	CLP + P2-1 (0.1)	CLP + P2-1 (1.0)
		0	81.1	59.36	16.8
		0	75.9	56.19	16.2
		0	78.4	57.95	14.3
		0	66.4	55.32	20.4
		KC
		Control	CLP	CLP + P2-1 (0.1)	CLP + P2-1 (1.0)
		0	106	128.7	151.9
		0.1	103.6	116.3	155
		0.09	222.4	31.9	10.5
		0.2	208.9	105.9	15.5
		MCP-1
		Control	CLP	CLP + P2-1 (0.1)	CLP + P2-1 (1.0)
		0.82	20.9	25.4	6.8
		0.93	14.2	25.6	7.9
		0.88	25.1	31.2	7.4
		1.44	24	21.8	5.2
		MIP-2
		Control	CLP	CLP + P2-1 (0.1)	CLP + P2-1 (1.0)
		13.9	171.9	203.2	172.1
		13.6	167.5	193.1	177.3
		10.8	270.8	174.2	14.9
		12.4	239.1	159.2	12.4
		MIP-1 gama
		Control	CLP	CLP + P2-1 (0.1)	CLP + P2-1 (1.0)
		44.9	286.3	280.3	128.6
		48.8	279.2	263.7	137.5
		32.4	349.5	278.8	54.5
		30.6	363.8	275.6	68.8
		PF-4
		Control	CLP	CLP + P2-1 (0.1)	CLP + P2-1 (1.0)
		65.1	323.8	302.3	109.2
		61.3	292.2	268.3	118.3
		88.3	250.3	285.4	114.4
		46.4	308.4	298.4	64.9
		sTNF-RI
		Control	CLP	CLP + P2-1 (0.1)	CLP + P2-1 (1.0)
		11.5	170.9	143.4	21.5
		12.7	122.5	116.1	32.7
		10.5	349.5	179.9	198.2
		9.8	319.9	149.3	143.4

## Sheet: Fig. 4B
	0
			Effect of P2-1 (1.0 mg/kg) on CAIA Arthritis Scores (Male)														Effect of P2-1 (1.0 mg/kg) on CAIA Arthritis Scores (Female)
				Vehicle					P2-1 (1.0 mg/kg)									Vehicle					P2-1 (1.0 mg/kg)
			Mice #	#1	#2	#3	#4	#5	#6	#7	#8	#9	#10				Mice #	#1	#2	#3	#4	#5	#6	#7	#8	#9	#10
			Day 0		0	0	0	0	0	0	0	0	0				Day 0		0	0	0		0	0	0	0
			Day 1		0	0	0	0	0	0	0	0	0				Day 1		0	0	0		0	0	0	0
			Day 2		0	0	0	0	0	0	0	0	0				Day 2		0	0	0		0	0	0	0
			Day 3		0	0	0	0	0	0	0	0	0				Day 3		0	0	0		0	0	0	0
			Day 4		0	0	0	0	0	0	0	0	0				Day 4		0	0	0		0	0	0	0
			Day 5		0	0	0	0	0	0	0	0	0				Day 5		0	0	0		0	0	0	0
			Day 6	8	7	8	9	7	7	9	7	8	8				Day 6	8	5	7	6		7	7	8	7
			Day 7	10	8	9	10	8	8	10	6	7	10				Day 7	9	9	8	8		5	9	7	6
			Day 8	11	7	8	13	7	7	11	5	7	10				Day 8	8	9	9	8		5	8	7	6
			Day 9	10	7	8	13	7	7	11	4	7	10				Day 9	8	8	8	9		5	8	7	5
			Day 10	10	7	8	13	7	7	10	4	6	10	P = 0.331			Day 10	8	8	8	9		5	7	6	4
			Effect of P2-1 (2.0 mg/kg) on CAIA Arthritis Scores (Female)														Effect of P2-1 (2.0 mg/kg) on CAIA Arthritis Scores (Female)
				Vehicle					P2-1 (2.0 mg/kg)									Vehicle					P2-1 (2.0 mg/kg)
			Mice #	#1	#2	#3	#4	#5	#6	#7	#8	#9	#10				Mice #	#1	#2	#3	#4	#5	#6	#7	#8	#9	#10
			Day 0		0	0	0	0	0	0	0	0	0				Day 0		0	0	0		0	0	0	0
			Day 1		0	0	0	0	0	0	0	0	0				Day 1		0	0	0		0	0	0	0
			Day 2		0	0	0	0	0	0	0	0	0				Day 2		0	0	0		0	0	0	0
			Day 3		0	0	0	0	0	0	0	0	0				Day 3		0	0	0		0	0	0	0
			Day 4		0	0	0	0	0	0	0	0	0				Day 4		0	0	0		0	0	0	0
			Day 5		0	0	0	0	0	0	0	0	0				Day 5		0	0	0		0	0	0	0
			Day 6	9	9	5	7	6	7	6	7	5	6				Day 6	10	10	7	7		9	8	7	7
			Day 7	10	10	7	9	6	8	4	6	4	6				Day 7	10	10	8	7		10	7	5	5
			Day 8	9	9	7	9	6	8	2	7	1	6				Day 8	10	10	10	8		10	8	5	6
			Day 9	9	10	6	9	7	8	2	7	1	5				Day 9	10	10	9	8		10	8	4	6
			Day 10	9	10	6	9	6	7	2	7	1	5	P = 0.07314			Day 10	10	10	10	9		9	8	4	5		P = 0.029
			Effect of P2-1 (2.0 mg/kg) on CAIA Arthritis Scores (Female)
				Vehicle					P2-1 (2.0 mg/kg)
			Mice #	#1	#2	#3	#4	#5	#6	#7	#8	#9	#10
			Day 0		0	0	0		0	0	0	0
			Day 1		0	0	0		0	0	0	0
			Day 2		0	0	0		0	0	0	0
			Day 3		0	0	0		0	0	0	0
			Day 4		0	0	0		0	0	0	0
			Day 5		0	0	0		0	0	0	0
			Day 6	8	5	7	6		6	7	7	7
			Day 7	9	9	8	8		5	9	6	6
			Day 8	8	9	9	8		5	8	7	6		P = 0.03839
			Day 9	8	8	8	9		5	8	7	5		P = 0.01655
			Day 10	8	8	8	9		5	7	6	4		P = 0.01796
			Effect of P2-1 (2.0 mg/kg) on CAIA Arthritis Scores (Male)
				Vehicle					P2-1 (2.0 mg/kg)
			Mice #	#1	#2	#3	#4	#5	#6	#7	#8	#9	#10
			Day 0	0	0	0	0	0	0	0	0	0	0
			Day 1	0	0	0	0	0	0	0	0	0	0
			Day 2	0	0	0	0	0	0	0	0	0	0
			Day 3	0	0	0	0	0	0	0	0	0	0
			Day 4	0	0	0	0	0	0	0	0	0	0
			Day 5	0	0	0	0	0	0	0	0	0	0
			Day 6	8	7	5	6	7	8	7	5	6	6
			Day 7	9	7	7	8	7	9	8	6	7	6
			Day 8	9	9	8	8	9	9	8	7	6	5	p = 0.09069
			Day 9	9	9	9	9	9	8	8	6	6	5	P = 0.008
			Day 10	8	10	9	9	9	7	8	6	6	5	P = 0.016

## Sheet: Fig. 4C
			Effect of P2-1 on CAIA-induced pain sensitivity (Von Frey Score)
			Normal	CAIA (Day 6)	CAIA + Veh (Day 10)	CAIA + P2-1 (day 10)
			0.81	0.63	0.16	0.14
			0.63	0.14	0.14	0.18
			0.68	0.11	0.16	0.16
			0.66	0.75	0.16	0.44
			1.51	0.64	0.05	0.78
			1.31	0.21	0.06	0.14
			1.91	0.21	0.06	0.17
			0.67	0.16	0.21	1.23
			1.5	0.27	0.11	0.05
			0.75	0.75	0.07	0.75
				0.53	0.16	0.26
				0.15	0.11	0.09
				0.34	0.09	0.57
						P = 0.04443 vs Veh

## Sheet: Fig. 4D
			Effect of P2-1 on CAIA-induced cytokines/chemokines
			VCAM1
			Control	CAIA	CAIA + P2-1
			0.019	17.3	3.3
			0.15	16.1	4.5
			0	19.8	1.2
			0	16.9	0.7
				32.9	4
				30.8	4.5
				23.9	8.2
				22.4	10.3
					P = 0.0007706
			sTNFRI
			Control	CAIA	CAIA + P2-1
			2.2	47.3	23.4
			2.1	44.3	20.4
			0.3	44.8	17.4
			0.1	42.1	17
				53.6	24.9
				51.2	22.3
				44.1	40
				43.5	36.8
					P= 0.00077753
			sTNFRII
			Control	CAIA	CAIA + P2-1
			1.1	17.4	12.4
			0.9	16.9	11.7
			0.5	17.2	6.5
			0.1	14.3	5.7
				28.9	3.2
				26.6	2.8
				14.8	5.8
				15.4	5.9
					P= 0.00077753
			MIP-1gamma
			Control	CAIA	CAIA + P2-1
			0.75	52	39.6
			1.1	55.3	44.2
			0.43	58.6	29
			0.42	58.3	33.7
				60.6	41.8
				59.7	44.8
				49	49.9
				56.2	50.4
					P =0.00163
			MIP2
			Control	CAIA	CAIA + P2-1
			0.75	8.4	2.5
			1.1	8.6	2.7
			0.43	7.2	4.3
			0.42	7.6	4.8
			3.47	6.8	5.9
				8.3	7.2
				4.5	5.1
				5.1	5.2
					P =0.02067
			P-selectin
			Control	CAIA	CAIA + P2-1
			4.11	8.4	3.6
			3.3	7.3	4
			3.2	4.7	3.4
			4.11	5.7	3.6
				6.1	5.3
				6.5	5.6
				7.8	7.5
				8.6	8
					P =0.04584

## Sheet: Fig. 6A Left
RNA seq analysis of HMGB1-modified genes in human PBMCs.
Gene name	BaseMean	log2FoldChange	lfcSE	pvalue	padj
CXCL5 (ENA-78)	20513.3	9.95103	0.359071	2.30726e-170	3.97356e-166
IL1B (IL-1β)	15479	8.22289	0.304619	1.50218e-161	1.29353e-157
MT1G (Metallothionein-1G)	2909.6	9.37698	0.3663	1.73898e-144	9.98288e-141
CXCL8 (IL-8)	24753.5	5.98529	0.241395	2.72614e-137	1.17374e-133
IL7R (IL-7 receptor)	7519.35	5.20996	0.216149	1.35135e-129	4.65461e-126
CXCL1 (GRO-α)	2777.27	8.07374	0.366905	3.71588e-108	1.06658e-104
MT1H	2764.59	10.3407	0.47102	3.05432e-106	7.5145e-103
FSD1L	1258.85	3.21125	0.148042	1.64576e-105	3.5429e-102
TNIP1 (TNFAIP3 Interacting Protein 1)	10356.8	3.05753	0.144783	3.94901e-100	7.55665e-97
MT1X	2328.31	5.85726	0.301877	4.82316e-85	8.30644e-82
TNIP3	1627.42	9.39171	0.484227	2.26321e-84	3.54336e-81
MT2A	4871.94	5.68271	0.319311	4.52859e-72	6.49929e-69
MT1E	613.572	5.37453	0.301624	6.36839e-72	8.43665e-69
SOCS3 (Suppressor of Cytokine Signaling 3)	2866.39	4.9235	0.278477	3.01105e-71	3.70402e-68
GRAMD1A	3452.4	3.35037	0.194026	5.2721e-68	6.05307e-65
CD44 (cell surface receptor)	78906.2	1.88835	0.110242	9.19486e-67	9.89711e-64
PRKAG2-AS2	755.316	3.75839	0.219899	1.06317e-66	1.07705e-63
MCOLN2 (Mucolipin TRP Cation Channel 2)	727.727	3.34381	0.19584	1.46064e-66	1.39751e-63
EBI3	340.09	5.13897	0.306194	2.36436e-64	2.1431e-61
HS3ST3B1	1320	5.27873	0.315185	2.86935e-64	2.4708e-61
GPR84 (G protein-coupled receptor 84)	1524.7	2.97022	0.180292	3.95974e-62	3.24736e-59
ZNF703 (Zinc finger protein 703)	201.706	-2.76448	0.168033	6.63715e-62	5.19568e-59
MS4A6A (Alsherimer's disease)	1959.3	-4.21214	0.261116	8.43328e-60	6.31469e-57
FPR2 (Formyl peptide receptor 2)	3512.81	5.85428	0.36721	1.66837e-58	1.19719e-55
S100A12	191.494	4.51204	0.284244	9.20803e-58	6.34323e-55
CCL7 (MCP-3)	742.674	5.08616	0.321908	2.03475e-57	1.34779e-54
TMEM132A	187.323	6.11084	0.387925	1.65504e-56	1.05567e-53
MT1F	1053.25	5.92502	0.382958	4.97868e-55	3.06224e-52
CYP1B1	18729.9	1.94767	0.12907	1.72711e-52	1.02567e-49
KCNJ5	316.535	-6.77677	0.453618	2.42136e-51	1.39002e-48
ITGB8 (integrin beta 8)	4194.3	6.77172	0.457253	7.25041e-51	4.02795e-48
MAP1LC3A	375.36	7.32554	0.49533	2.96291e-50	1.5946e-47
ARNTL2	1022.8	2.77711	0.190657	3.44645e-49	1.79863e-46
LY9 (CD229)	377.713	-2.67343	0.184389	8.53777e-49	4.32463e-46
ITPKB (Inositol Trisphosphate 3-Kinase B)	2267.53	-2.08739	0.145402	7.84685e-48	3.8611e-45
RNF19B (ring finger protein 19B)	2066.25	1.92923	0.134328	8.2731e-48	3.95776e-45
MSANTD3	761.214	2.42275	0.173653	2.51074e-45	1.16865e-42
SLC39A8	24618.7	5.5503	0.40011	4.6888e-45	2.12501e-42
GPNMB	81259.2	-2.91093	0.211116	2.95649e-44	1.30556e-41
PRKACB	1303.55	-2.6907	0.197851	2.71022e-43	1.16688e-40
LAD1	146.341	2.86051	0.210819	3.98252e-43	1.67285e-40
SH3PXD2B	3149.84	4.58836	0.339512	7.53306e-43	3.08891e-40
CD80	393.878	4.85627	0.360032	1.07465e-42	4.30412e-40
CD180	2090.93	-3.97521	0.295528	1.65209e-42	6.46643e-40
EPB41L1	229.355	-2.22623	0.165194	1.82081e-42	6.96843e-40
SGPP2	364.259	3.24369	0.24193	3.38035e-42	1.26558e-39
RGS12	794.045	-1.97618	0.147482	5.40538e-42	1.98067e-39
LGALS3	13592.1	-1.88522	0.143732	2.31366e-40	8.30121e-38
HMGN2P46	235.041	4.80948	0.367887	4.8791e-40	1.71485e-37
ITGAE	1300.39	-1.73704	0.133981	1.92242e-39	6.57377e-37
LTBP2	853.264	3.63515	0.281136	1.94671e-39	6.57377e-37
TMEM37	130.852	-5.70507	0.439519	2.91449e-39	9.65255e-37
HGF	1085.29	-4.89434	0.384628	2.17884e-38	7.08e-36
SERPINB9	2243.46	2.21865	0.173981	2.45329e-38	7.82418e-36
MSR1	5573.02	-3.4851	0.274433	3.53528e-38	1.10699e-35
PTGES	5486.62	9.73914	0.769223	5.5604e-38	1.71002e-35
CD300E	9389.06	6.13588	0.488361	1.81632e-37	5.48783e-35
DYRK4	602.657	-1.80997	0.1436	1.95023e-37	5.79085e-35
TLR7	1106.97	-3.45628	0.275177	2.03567e-37	5.94209e-35
MSC	880.655	3.26958	0.260919	3.45959e-37	9.93017e-35
STX1A	198.78	3.84427	0.307187	4.14351e-37	1.16983e-34
SOD2	121665	3.53047	0.280813	5.32821e-37	1.48004e-34
MCEMP1	1342.07	3.7236	0.299079	9.13681e-37	2.49768e-34
NDP	240.078	7.72785	0.622943	9.77162e-36	2.62948e-33
GUCY1B2	119.994	4.21459	0.347061	4.12999e-35	1.09426e-32
NFKBIA	9903.29	2.373	0.195221	5.48204e-35	1.43048e-32
CEBPA	1266.22	-1.85425	0.153339	1.0648e-34	2.73701e-32
DPEP2	964.901	-3.28959	0.273655	1.65348e-34	4.18769e-32
GCH1	1930.71	3.54247	0.295816	2.60708e-34	6.50712e-32
TNFRSF11A	347.156	-3.92001	0.327422	2.93457e-34	7.21987e-32
MMP14	13096.2	3.15551	0.26349	3.09568e-34	7.509e-32
PMFBP1	318.334	-3.85648	0.323021	4.45449e-34	1.06549e-31
VCAN	20287.3	4.4812	0.378301	1.39321e-33	3.28682e-31
SEMA4A	2890.19	2.44668	0.20797	4.7381e-33	1.1027e-30
PNPLA1	110.08	5.22314	0.445533	7.77504e-33	1.78536e-30
SMPD5	75.2944	5.12277	0.434639	9.53739e-33	2.16122e-30
ZC3H12A	1175.63	2.56524	0.219657	1.1876e-32	2.65622e-30
TRAF3IP2	538.891	2.55215	0.218548	1.25368e-32	2.76805e-30
ENSG00000259354	196.392	4.71393	0.404128	1.34127e-32	2.92396e-30
PDE4B	1111.34	2.96674	0.256	3.25238e-32	7.00156e-30
QSOX1	4452.99	1.85354	0.159767	3.90187e-32	8.29605e-30
CD82	4099.36	2.51707	0.220321	2.30322e-31	4.83732e-29
FAM117B	328.888	-1.53312	0.133854	2.6832e-31	5.56749e-29
PLA2G15	761.905	-1.69686	0.148508	3.10846e-31	6.37309e-29
ME3	107.365	-3.19139	0.280437	4.14426e-31	8.39676e-29
TLN2	272.701	-2.75902	0.245697	1.99569e-30	3.99648e-28
TBC1D9	6875.6	2.1787	0.195154	5.0369e-30	9.97074e-28
STAT4	941.417	4.06233	0.365492	6.31743e-30	1.23635e-27
PABPC4	5985.33	-1.09713	0.0982582	1.05624e-29	2.04389e-27
PAQR8	522.308	-1.47721	0.132866	1.25518e-29	2.38827e-27
MBOAT1	654.552	-1.67414	0.150776	1.26195e-29	2.38827e-27
SCIN	856.404	-3.66067	0.332874	2.21545e-29	4.14722e-27
SLC41A2	2277.81	2.62587	0.23993	5.02897e-29	9.31278e-27
ABCG2	227.49	-3.39342	0.31307	1.42325e-28	2.60757e-26
SLFN5	4941.39	1.19082	0.109064	1.45166e-28	2.63163e-26
THRA	873.539	-2.64804	0.244506	1.72616e-28	3.09665e-26
GGTA1	427.396	-4.99097	0.463449	2.59207e-28	4.60213e-26
REPS2	262.081	-2.00641	0.185919	3.21797e-28	5.65509e-26
ENSG00000226281	238.268	-5.05222	0.471509	5.60891e-28	9.75724e-26
HCK	11024.2	1.81341	0.168671	5.75165e-28	9.90549e-26
SLC11A1	12279.3	3.64545	0.339863	5.98568e-28	1.02065e-25
CLEC4E	2274.57	4.06298	0.380977	8.44647e-28	1.42613e-25
SLC26A11	1433.13	-2.80374	0.262914	8.65553e-28	1.44724e-25
MYO1G	3590.3	2.93979	0.275787	1.04278e-27	1.7268e-25
CA12	291.936	13.3941	3.17356	1.08529e-27	1.78008e-25
KYNU	11267.7	2.57127	0.24188	1.51275e-27	2.45779e-25
SPATC1	211.21	4.43307	0.417689	1.82064e-27	2.93039e-25
CXCL3 (GRO3 or MIP-2β)	1208.1	3.63419	0.343372	1.97677e-27	3.15222e-25
TRAF1	2026.27	2.30284	0.217271	2.38142e-27	3.76264e-25
HS3ST2	208.398	-8.17916	0.755553	2.41176e-27	3.77594e-25
DHRS9	2158.61	-3.23605	0.306347	3.22324e-27	5.00096e-25
BTG3	525.952	2.18354	0.206677	3.55848e-27	5.4718e-25
LAMP3	2521	3.11476	0.296131	3.98935e-27	6.08005e-25
MIR9-1HG	58.4745	3.83803	0.363218	4.11524e-27	6.21691e-25
SLC46A1	970.388	-2.39968	0.227732	4.17128e-27	6.24677e-25
LIMK2	2031.33	3.5162	0.334325	4.22152e-27	6.2675e-25
LIPA	49664.4	-2.84014	0.270577	5.74475e-27	8.45608e-25
PTGS2	742.023	4.71233	0.452673	1.23879e-26	1.808e-24
CD38	1811.51	3.28675	0.315773	1.56052e-26	2.25842e-24
C15orf48	6960.18	3.7699	0.362503	1.69456e-26	2.43198e-24
NRGN	211.226	-2.29422	0.221209	2.55237e-26	3.6328e-24
MN1	198.735	4.5275	0.439252	4.17014e-26	5.88674e-24
SLC16A10	1055.76	4.7231	0.461378	5.5256e-26	7.73674e-24
CRACD	144.094	5.30287	0.516575	5.77365e-26	8.01886e-24
RNF144B	3856.25	1.75546	0.170476	7.1559e-26	9.85912e-24
PROCR	99.1505	4.02476	0.394013	1.41089e-25	1.92844e-23
TENT5A	1703.14	-1.43793	0.140325	1.45741e-25	1.97635e-23
NECTIN2	1700.77	2.63907	0.258888	1.50533e-25	2.02537e-23
TNFAIP6	4612.17	6.77049	0.66708	1.73411e-25	2.31511e-23
FAXDC2	150.387	-3.64693	0.361117	3.66366e-25	4.85351e-23
ALS2CL	246.034	-1.84614	0.182405	4.14262e-25	5.44612e-23
C6orf223	351.926	4.54642	0.451821	5.13207e-25	6.6958e-23
PLAUR	5865.79	1.90139	0.188508	5.65576e-25	7.32357e-23
MT1M	386.183	10.4742	1.00533	6.54862e-25	8.41645e-23
EPB41L3	11454.2	1.86887	0.186264	8.10168e-25	1.03353e-22
RPS6KA2	2460.34	-2.02947	0.202887	1.20299e-24	1.52337e-22
PTPN12	7493.95	1.21765	0.120741	1.23116e-24	1.54766e-22
FCMR	1611.3	-2.08186	0.208424	1.3657e-24	1.70436e-22
NOL4L	641.56	2.23722	0.224474	1.61993e-24	2.00708e-22
ADM	416.324	2.22179	0.222848	1.65848e-24	2.04016e-22
AK4	693.476	2.78629	0.280518	2.01316e-24	2.45891e-22
CD1D	360.523	-2.51769	0.254004	2.58411e-24	3.13406e-22
HAMP	103.657	-3.73675	0.37749	2.93056e-24	3.52938e-22
MTURN	299.773	-1.78727	0.180031	2.96541e-24	3.54655e-22
ADA2	29359.6	-1.58162	0.15965	4.19797e-24	4.98603e-22
LSS	335.229	2.21526	0.224785	5.06713e-24	5.97714e-22
VAT1	5988.75	-1.82833	0.185442	5.60274e-24	6.56168e-22
MBP	3023.46	-1.75849	0.178266	5.64955e-24	6.56168e-22
LINC02975	332.687	-2.77352	0.282297	5.67699e-24	6.56168e-22
SLC38A6	1194.9	-1.77092	0.180848	1.09299e-23	1.2549e-21
MSC-AS1	718.909	2.48502	0.254313	1.15632e-23	1.31882e-21
S100A8	6221.16	3.02235	0.3088	1.20456e-23	1.3648e-21
ENSG00000285492	120.974	-6.1305	0.625194	1.26263e-23	1.42124e-21
KCNJ5-AS1	728.289	-2.38189	0.245089	1.78654e-23	1.99791e-21
CASP5	59.3472	4.66971	0.477534	1.84723e-23	2.05245e-21
MPZL1	2346.72	1.2053	0.123051	1.97447e-23	2.17977e-21
KIFC3	1902.79	2.28755	0.235672	2.18844e-23	2.4006e-21
CD9	9605.33	-2.78537	0.287748	2.76704e-23	3.01608e-21
ANKRD22	426.811	4.6759	0.484435	2.84904e-23	3.08592e-21
IRAK3	6339.65	0.998577	0.102662	5.24848e-23	5.64933e-21
SCN1B	110.608	3.26594	0.339502	5.46034e-23	5.84087e-21
DOCK4	4921.44	1.77414	0.184308	6.01484e-23	6.39429e-21
MARCKSL1	545.985	1.76788	0.184401	8.94711e-23	9.45319e-21
SNX29	1972.42	-1.20065	0.124865	1.11795e-22	1.17399e-20
A2M	19086.9	-1.97649	0.207113	1.15385e-22	1.20434e-20
SLC1A2	2118.19	4.30326	0.453217	1.2546e-22	1.30161e-20
C3	6754.6	2.75994	0.29049	1.41902e-22	1.46337e-20
AMDHD1	124.841	-2.59344	0.27302	1.53486e-22	1.57342e-20
ABCC5	2448.56	-2.02097	0.212875	1.79905e-22	1.83333e-20
SGPL1	4260.2	0.952265	0.0990933	1.93615e-22	1.96144e-20
MET	1179.79	6.13521	0.651818	2.44297e-22	2.4604e-20
DENND4C	3601.96	-1.34953	0.141911	2.57288e-22	2.57617e-20
FFAR2	129.827	3.24282	0.344075	2.77629e-22	2.76377e-20
ZNF618	137.22	-1.87171	0.197829	2.97905e-22	2.94857e-20
EHD1	1697.81	2.74791	0.291907	2.99728e-22	2.94967e-20
ADORA3	62.9811	-4.05047	0.428934	3.42891e-22	3.35527e-20
RAB11FIP4	969.38	-1.54878	0.163729	3.46348e-22	3.36994e-20
UICLM	43.5482	-4.77364	0.499711	4.16584e-22	4.03057e-20
LAMB3	516.097	3.51598	0.375794	5.25127e-22	5.05237e-20
MIR3945HG	518.542	3.56101	0.381436	5.76633e-22	5.51709e-20
CKAP4	2080.81	1.89946	0.203892	7.92773e-22	7.54317e-20
NBPF9	477.835	1.25331	0.13326	8.09655e-22	7.66147e-20
LYN	17035.6	1.73685	0.185912	8.256e-22	7.76966e-20
CDKN2B	342.731	-1.6239	0.173733	9.80013e-22	9.17271e-20
TREM1	610.167	3.66799	0.395372	1.10696e-21	1.03049e-19
FOXRED2	318.83	-1.92882	0.207571	1.30711e-21	1.21027e-19
ACKR3	77.0794	4.12797	0.446119	1.34373e-21	1.23753e-19
SORBS3	1400.32	-2.27141	0.24492	1.43972e-21	1.31887e-19
CCM2L	165.592	10.0676	1.33005	1.80982e-21	1.64258e-19
ENSG00000291105	107.61	8.06799	0.832264	1.81216e-21	1.64258e-19
RNF130	9308.85	-0.834064	0.089059	2.21793e-21	1.99985e-19
LRP8	1210.04	1.54206	0.166741	2.7759e-21	2.48993e-19
GOLGA7B	115.246	-4.05606	0.444567	4.35711e-21	3.88799e-19
ABI3	494.195	-2.56798	0.28119	4.52495e-21	4.01694e-19
ARG2	242.662	3.66661	0.402394	4.78177e-21	4.22316e-19
FILIP1L	460.763	1.60367	0.174903	5.29582e-21	4.65329e-19
BMP6	109.649	2.98242	0.327551	6.05459e-21	5.29301e-19
CTSK	1021.94	-2.01552	0.221647	7.51653e-21	6.53786e-19
NCOA7	1076.98	-1.45166	0.159165	9.10951e-21	7.88361e-19
SPTBN1	1213.46	-2.77577	0.307142	9.8342e-21	8.46823e-19
SNED1	106.632	-3.31972	0.367594	1.10665e-20	9.46016e-19
GCLC	3561.47	-2.00844	0.221549	1.1096e-20	9.46016e-19
PDK4	139.115	-5.13789	0.569919	1.14928e-20	9.75021e-19
ENAH	81.0833	3.61337	0.40004	1.31526e-20	1.11036e-18
LINC02605	64.9583	4.76974	0.527956	1.35122e-20	1.13516e-18
PTMS	546.118	-1.24609	0.13689	1.4574e-20	1.21685e-18
ZNF395	592.083	-2.19213	0.243125	1.46259e-20	1.21685e-18
GPR132	436.799	1.60301	0.177181	1.63999e-20	1.35788e-18
SMPDL3A	4933.46	2.95276	0.328883	1.74121e-20	1.43479e-18
SERPINA1	2322.41	2.34675	0.261987	2.4997e-20	2.04999e-18
IRAK2	565.86	2.62716	0.294115	2.78929e-20	2.27665e-18
FABP4	4716.9	-3.43295	0.385308	2.91213e-20	2.36326e-18
ACP5	8145.45	-2.54613	0.284662	2.92285e-20	2.36326e-18
SKIL	3715.14	1.34922	0.150166	3.10546e-20	2.49917e-18
SLC39A10	521.501	-2.10667	0.235959	3.43634e-20	2.74817e-18
CCL8 (MCP-2)	110.556	6.12112	0.685002	3.44678e-20	2.74817e-18
CCL20 (MIP-3α)	517.927	6.95606	0.781984	3.77103e-20	2.99284e-18
SELENOP	482.527	-9.60626	1.06774	3.82255e-20	3.01981e-18
ARHGAP15	786.616	-1.29814	0.144565	3.95868e-20	3.11308e-18
ZBED3	501.964	-2.34852	0.264562	4.9276e-20	3.85742e-18
H2BC21	193.968	1.65596	0.185722	5.16264e-20	4.02312e-18
PHLDB1	400.654	2.14696	0.241655	5.22298e-20	4.05181e-18
GNA15	1545.68	1.40481	0.157165	5.35064e-20	4.13223e-18
RASGRP1	509.702	3.268	0.371134	8.16284e-20	6.27591e-18
CD302	2362.05	-1.72483	0.195101	9.15511e-20	7.00752e-18
RAD51AP1	231.096	-1.45884	0.164851	1.07266e-19	8.17402e-18
MAILR	223.686	3.22176	0.367939	1.10394e-19	8.37535e-18
PSTPIP2	3743.08	2.55251	0.290434	1.13423e-19	8.56745e-18
CHST2	1517.2	1.82263	0.207131	1.23125e-19	9.25964e-18
IL18	1510.16	2.34697	0.267357	1.23806e-19	9.27038e-18
VEGFB	625.805	-1.69253	0.192241	1.29782e-19	9.67577e-18
PSMA6	233.778	1.64901	0.187201	1.36046e-19	1.0099e-17
FRRS1	317.531	-1.93073	0.219958	1.44296e-19	1.06655e-17
CD22	696.274	-1.43841	0.163298	1.55981e-19	1.148e-17
WTAP	5618.74	2.00848	0.228888	1.6103e-19	1.18011e-17
GXYLT2	66.0893	6.64335	0.73841	1.61826e-19	1.18092e-17
ICAM1	5482.94	1.72573	0.197204	1.90002e-19	1.38068e-17
SCPEP1	4398.58	-0.948104	0.107014	1.90855e-19	1.38105e-17
PFKFB2	758.106	-1.17842	0.133952	2.32727e-19	1.677e-17
SLC66A3	1789.05	-0.990165	0.112185	2.39312e-19	1.71726e-17
TNFAIP3	8008.48	1.95991	0.224647	2.447e-19	1.74864e-17
MDM1	597.545	1.31279	0.149733	2.64718e-19	1.88387e-17
RELB	876.517	1.38192	0.157891	2.76893e-19	1.96241e-17
ATP2C1	4428.51	1.22373	0.139699	3.15921e-19	2.22983e-17
BCL3	1127.86	2.10986	0.242971	3.17533e-19	2.23207e-17
ACO1	2176.73	1.62966	0.188023	4.81729e-19	3.37249e-17
SPACA6	117.654	4.19691	0.489342	4.84688e-19	3.37948e-17
COL24A1	62.6416	4.01331	0.465823	5.06355e-19	3.51631e-17
PLXNA2	293.588	1.85371	0.214634	5.44088e-19	3.76316e-17
LINC02541	92.8795	3.6451	0.424425	5.50128e-19	3.78972e-17
SLC9A7P1	245.836	2.89622	0.337099	5.75632e-19	3.94962e-17
ELOVL7	141.313	4.81364	0.562053	6.29791e-19	4.30407e-17
PCNX1	3596.69	1.37979	0.159358	6.39313e-19	4.35188e-17
ADD2	180.574	-3.23112	0.377536	6.72695e-19	4.56109e-17
SPRED2	778.364	1.42304	0.165087	8.62664e-19	5.8262e-17
DNMT3A	759.967	-2.06999	0.241749	8.84527e-19	5.95051e-17
NFKB2	3340.34	1.59715	0.185884	9.01505e-19	6.03264e-17
CLEC4D	592.493	4.34782	0.510235	9.0374e-19	6.03264e-17
ENSG00000289198	52.6959	3.78177	0.443247	9.07626e-19	6.03519e-17
ZBTB10	683.966	1.6228	0.188897	9.16785e-19	6.07264e-17
CYP27B1	817.545	3.06624	0.359399	9.61684e-19	6.34564e-17
RAB42	353.836	-2.35663	0.276855	1.2105e-18	7.95694e-17
RASL11A	95.29	-2.89259	0.34032	1.30304e-18	8.53266e-17
SYNPO2	74.6113	3.24012	0.379889	1.41724e-18	9.24532e-17
SLC43A2	626.184	3.41444	0.403026	1.46747e-18	9.53692e-17
CMIP	3542.81	0.908747	0.10527	1.58217e-18	1.02437e-16
GJB2	977.895	3.61803	0.427641	1.59109e-18	1.02628e-16
TP53INP2	1501.63	3.29614	0.389914	1.77199e-18	1.1387e-16
MTF1	5717.13	1.69443	0.200003	1.79127e-18	1.14681e-16
EPAS1	942.937	-1.99998	0.235861	1.84787e-18	1.17867e-16
KCNAB2	5764.83	-1.47864	0.173542	1.91455e-18	1.21669e-16
FAM124A	65.3312	4.51668	0.532027	2.11414e-18	1.33859e-16
TEX2	1893.1	-1.33915	0.15728	2.27462e-18	1.43493e-16
P2RY2	279.139	1.52347	0.179928	2.96838e-18	1.86574e-16
G0S2	2228.2	3.15009	0.375298	3.10151e-18	1.94233e-16
BACE1	641.502	-1.86361	0.221504	3.46687e-18	2.16328e-16
SRGN	38627.1	2.21575	0.263834	3.67276e-18	2.28348e-16
PDPN	902.402	7.87511	0.944047	3.70632e-18	2.29605e-16
GRINA	6359.38	1.22743	0.146153	7.26496e-18	4.48448e-16
BAIAP2-DT	699.299	-1.12589	0.133877	7.35081e-18	4.52128e-16
ASRGL1	1266.29	-2.6134	0.31541	7.63162e-18	4.67729e-16
LGALS9	5274.47	-1.16007	0.138488	9.28838e-18	5.6725e-16
CD74	57595.1	-1.43142	0.172155	1.04613e-17	6.36625e-16
PILRA	3079.77	1.29429	0.155281	1.13401e-17	6.87673e-16
NFKB1	5479.37	1.32911	0.160336	1.68988e-17	1.02116e-15
ENSG00000289880	56.3891	3.8219	0.467505	1.7725e-17	1.06734e-15
NECTIN4	126.316	2.29614	0.279962	1.78754e-17	1.07265e-15
NFAT5	3706	1.44267	0.174934	2.03402e-17	1.21631e-15
S100A9	10416.8	2.69259	0.329436	2.04392e-17	1.218e-15
GRK6	1474.59	0.925249	0.111256	2.37899e-17	1.41279e-15
SRPK2	1105.94	-0.676803	0.080902	2.49442e-17	1.47625e-15
FABP5	4504.64	-2.22011	0.272288	2.5793e-17	1.52126e-15
STARD13	323.996	-2.09291	0.256775	2.80659e-17	1.64966e-15
RTN4R	32.4256	-3.5014	0.42695	3.27856e-17	1.92052e-15
ENSG00000290021	53.2962	2.49099	0.305893	3.3153e-17	1.93546e-15
FCGR2A	1512.89	1.77155	0.217226	3.36035e-17	1.95513e-15
RAP2B	3742.76	-1.29311	0.15792	3.54481e-17	2.05551e-15
SLC29A3	1316.11	-1.52182	0.186362	3.66771e-17	2.11964e-15
DDIT4	638.947	2.60731	0.321763	3.71958e-17	2.14243e-15
LINC02384	142.866	4.25482	0.527483	4.15746e-17	2.3816e-15
GNAS	12576.8	-1.01327	0.12335	4.16248e-17	2.3816e-15
AMPD3	3591.26	1.68155	0.20656	4.33194e-17	2.47036e-15
PLAGL2	2326.06	1.62647	0.20017	4.4545e-17	2.53186e-15
IL1A	344.694	6.47873	0.805478	4.65109e-17	2.6349e-15
ITGAV	3874.5	1.21172	0.148522	5.51734e-17	3.1154e-15
TNIK	2336.97	2.94873	0.367191	6.24098e-17	3.51249e-15
ENSG00000266709	80.4684	3.79797	0.474247	6.45489e-17	3.62105e-15
JAK3	1715.63	2.85455	0.355235	6.73967e-17	3.76852e-15
TLR5	1074.98	-1.65255	0.204647	6.82745e-17	3.80525e-15
ITPR2	7525.93	1.27651	0.157174	7.07179e-17	3.92872e-15
IQCK	78.1615	-2.19299	0.272957	7.93042e-17	4.39157e-15
ATP6V0D2	109.454	-3.55411	0.445019	8.57516e-17	4.73338e-15
SNX10	6681.62	2.5672	0.321275	1.00579e-16	5.53408e-15
HEATR6-DT	58.958	3.242	0.406727	1.07237e-16	5.88166e-15
PDE4D	450.169	3.14272	0.396327	1.30438e-16	7.13145e-15
SAMD4A	120.809	-2.50113	0.315324	1.50533e-16	8.20403e-15
ST3GAL1	8563.47	1.61372	0.202106	1.72736e-16	9.38439e-15
CD40	1029.39	1.45955	0.183174	1.98387e-16	1.07441e-14
HTRA4	449.53	-2.48018	0.315085	2.35315e-16	1.2704e-14
MIDEAS	1957.67	-0.7623	0.0944329	2.36335e-16	1.27192e-14
C1QTNF1	95.6955	7.86338	0.956978	2.38211e-16	1.27803e-14
MT1JP	36.7698	10.0165	2.84054	2.46105e-16	1.31628e-14
VWF	339.574	-2.4709	0.314296	2.59823e-16	1.38535e-14
SSBP4	632.371	-0.975953	0.122042	2.96262e-16	1.57476e-14
USF2	3600.1	-0.841956	0.104933	3.12426e-16	1.65557e-14
TNFSF12	317.296	-1.18062	0.148538	3.19455e-16	1.68762e-14
DNAH17	76.529	4.46422	0.570472	3.48587e-16	1.83589e-14
CD274	2223.86	1.9238	0.244935	3.55205e-16	1.86504e-14
IDO1	4717.83	5.43035	0.698102	3.67314e-16	1.92276e-14
PLSCR1	4057.3	2.54549	0.325327	3.74488e-16	1.95437e-14
HEY1	60.4745	5.61288	0.716267	4.09505e-16	2.13066e-14
STK17A	712.738	1.17178	0.147959	4.11655e-16	2.1354e-14
UPB1	57.8103	5.56278	0.709165	4.54364e-16	2.34987e-14
NAMPT	18455.9	4.91706	0.635036	5.18428e-16	2.67316e-14
TPST1	241.289	2.76304	0.355585	5.30153e-16	2.72546e-14
FMNL3	5427.69	0.849888	0.107226	6.42753e-16	3.29449e-14
SLC7A11	6017.01	3.08697	0.399402	6.94116e-16	3.5472e-14
TREM2	1945.02	-3.3974	0.440549	7.50502e-16	3.82401e-14
ACOD1	399.743	8.02309	1.04287	7.99485e-16	4.06157e-14
SETDB2	1932.16	-1.37704	0.176784	8.67849e-16	4.39591e-14
M1AP	73.7262	-2.50893	0.32558	9.75679e-16	4.92761e-14
CEP135	1357.74	1.18312	0.151617	1.01195e-15	5.09585e-14
SYN1	36.3644	5.27513	0.671499	1.04855e-15	5.26478e-14
PLK3	1128.31	0.829142	0.105367	1.0926e-15	5.46998e-14
ENSG00000285744	170.171	4.14324	0.542296	1.18497e-15	5.91524e-14
VEGFA	3463.64	3.60096	0.47108	1.22453e-15	6.09505e-14
LY75	715.622	1.27088	0.163729	1.26536e-15	6.28013e-14
MXD1	4477.66	2.26481	0.296167	1.33048e-15	6.58437e-14
HIF1A	24431.9	2.60131	0.339161	1.67596e-15	8.27033e-14
PLCB4	30.0745	4.6261	0.598021	1.91259e-15	9.41103e-14
VAV1	4400.6	1.13043	0.146083	2.06397e-15	1.0127e-13
ADA	1460.16	2.10632	0.276683	2.12741e-15	1.04086e-13
LINC02185	902.76	-3.53017	0.467236	2.23974e-15	1.09271e-13
FGD6	1684.6	-1.03171	0.133582	2.31555e-15	1.12651e-13
NAB1	1223.54	1.08474	0.140648	2.38513e-15	1.15709e-13
ANKLE1	161.509	1.70075	0.222701	2.42433e-15	1.1728e-13
SESN1	595.349	-1.00517	0.130163	2.44365e-15	1.17884e-13
CSF2RB	5679.74	1.92982	0.254104	2.70505e-15	1.30129e-13
KCNQ1	201.351	-1.27246	0.166103	2.7818e-15	1.33449e-13
PTPRO	714.289	-1.54821	0.203244	2.83964e-15	1.35845e-13
FFAR4	65.0305	-3.99996	0.529718	2.90865e-15	1.38761e-13
CCL2 (MCP-1)	10141.5	4.95676	0.661464	3.35179e-15	1.5946e-13
SUSD6	7059.04	1.12199	0.146402	3.45075e-15	1.63716e-13
AOX1	117.833	5.03165	0.669632	3.50437e-15	1.65803e-13
FNDC3B	6196.87	1.53059	0.202071	4.0113e-15	1.89268e-13
ENSG00000230647	45.0883	10.3137	2.91454	4.24713e-15	1.99847e-13
SLC2A3	4771.91	1.94892	0.259273	4.26104e-15	1.99955e-13
BAIAP2	404.194	-1.30884	0.172447	4.52036e-15	2.11548e-13
ENSG00000279406	122.478	-1.82716	0.242478	4.5613e-15	2.12886e-13
RHBDF2	2065.24	1.37597	0.181684	4.78315e-15	2.22636e-13
CD47	4587.34	0.978333	0.127937	5.10383e-15	2.36922e-13
TMEM91	190.031	-1.34823	0.178219	5.26465e-15	2.43731e-13
IVD	947.062	-1.1907	0.156936	5.30032e-15	2.44724e-13
CXCL16	8637.88	1.11248	0.146722	6.3054e-15	2.90352e-13
CCL23	37.018	4.74862	0.63362	6.7915e-15	3.11902e-13
NFKBIZ	2342.48	1.51703	0.202384	7.10004e-15	3.25204e-13
PIK3AP1	20340.7	1.62991	0.217463	7.44176e-15	3.39952e-13
LGMN	6655.03	-2.053	0.276963	7.88358e-15	3.59183e-13
ENSG00000288819	76.5934	2.9522	0.398361	8.16982e-15	3.71242e-13
PDE4A	2049.86	1.2667	0.168687	8.96379e-15	4.06249e-13
JAG1	774.119	2.14145	0.288897	9.80553e-15	4.43231e-13
GSTK1	2357.16	-0.830848	0.109643	1.03866e-14	4.68269e-13
LIF (Leukemia Inhibitory Factor)	208.023	3.59758	0.488863	1.04463e-14	4.69729e-13
CXCL2 (MIP-2)	634.257	2.37291	0.321162	1.05501e-14	4.73161e-13
N4BP1	3357.33	1.11171	0.147886	1.08081e-14	4.83473e-13
ENSG00000289470	133.948	1.91087	0.258129	1.22429e-14	5.46238e-13
LINC02245	63.282	-1.80288	0.243307	1.3027e-14	5.78475e-13
ENSG00000260997	170.111	3.01792	0.411061	1.30327e-14	5.78475e-13
TMEM176A	668.485	1.94072	0.262871	1.3235e-14	5.85946e-13
CRTC3	1836.16	0.818609	0.108582	1.47096e-14	6.49559e-13
BTF3P7	27.5488	-4.71011	0.624341	1.49193e-14	6.57134e-13
CAVIN4	42.8289	2.70077	0.367162	1.50694e-14	6.62056e-13
SARDH	122.215	-4.07293	0.557546	1.52354e-14	6.67646e-13
DCLK2	37.8299	-2.82093	0.383192	1.61559e-14	7.06185e-13
AHR	3552.01	1.4705	0.198764	1.68952e-14	7.36631e-13
FAM53B	1068.24	-0.899293	0.119973	1.70845e-14	7.43003e-13
MNDA	4653.01	-1.71832	0.233174	1.78471e-14	7.74211e-13
CATIP-AS1	41.6672	3.75303	0.511779	2.11834e-14	9.16634e-13
TYMP	5244.2	1.56788	0.214273	2.47114e-14	1.06661e-12
FCER1G	9690.97	1.17575	0.159168	2.52384e-14	1.08664e-12
MARCO	2899.65	3.54927	0.490448	2.66036e-14	1.14256e-12
PLCB1	125.317	-2.26187	0.312042	3.09535e-14	1.32607e-12
VRK2	1108.29	1.15002	0.156728	3.80761e-14	1.62716e-12
CAT	2593.62	-1.24683	0.170523	3.93081e-14	1.67565e-12
ZBTB17	906.159	1.48419	0.203967	4.06252e-14	1.72752e-12
C5	199.273	-1.34771	0.18491	4.2452e-14	1.80076e-12
BIN2	2905.47	0.643969	0.0865083	4.39178e-14	1.85836e-12
MARCKS	16050.1	1.45137	0.201551	4.4409e-14	1.87218e-12
RAP1B	2710.07	1.0156	0.138197	4.44619e-14	1.87218e-12
SAMSN1	4028.77	1.86734	0.258889	4.88611e-14	2.05241e-12
DOCK3	756.411	-1.32855	0.182836	5.0057e-14	2.09752e-12
GRAMD4	1947.07	-1.41394	0.195136	5.24041e-14	2.19054e-12
GK	5859.5	2.3102	0.322346	5.46874e-14	2.28045e-12
IER5L	244.087	-1.35486	0.187161	6.00866e-14	2.49955e-12
GP1BA	217.077	3.48975	0.490212	6.591e-14	2.73519e-12
ENSG00000226239	36.539	6.43889	0.855913	6.9726e-14	2.88659e-12
CLIC4	6274.91	1.25169	0.173222	7.82355e-14	3.23111e-12
LPAR6	817.78	-2.13196	0.299161	7.86422e-14	3.24013e-12
BCL9L	1481.94	1.70717	0.238328	8.17056e-14	3.35831e-12
SEMA4D	1399.58	1.71194	0.239349	8.74952e-14	3.58772e-12
SLC45A3	81.9148	-2.05726	0.288833	8.90194e-14	3.64155e-12
SIGLEC10	4483.05	2.53681	0.357485	1.04439e-13	4.26222e-12
MCL1	14202.4	1.23338	0.17168	1.0708e-13	4.35966e-12
CD300H	87.4872	4.75245	0.677179	1.119e-13	4.53993e-12
NHSL2	864.51	-1.7776	0.250296	1.12086e-13	4.53993e-12
TESK1	913.656	-0.992683	0.137466	1.12299e-13	4.53993e-12
SNN	1915.98	-0.969717	0.134486	1.2644e-13	5.08864e-12
DNASE2B	25.9298	-9.29842	2.85245	1.26462e-13	5.08864e-12
MGAT1	7138.59	-1.02398	0.142702	1.27218e-13	5.10709e-12
GNGT2	141.922	-1.97789	0.279757	1.30141e-13	5.21228e-12
SERPINB2	81.6156	3.76128	0.535387	1.32302e-13	5.28657e-12
PMEPA1	101.909	1.75539	0.247447	1.33089e-13	5.30569e-12
ENSG00000255921	35.9384	3.12462	0.441236	1.39749e-13	5.55832e-12
CBFA2T3	217.212	-1.59384	0.224942	1.43997e-13	5.71411e-12
DOP1B	3890.72	-1.50984	0.2128	1.53034e-13	6.05875e-12
LYSMD2	611.69	1.11108	0.155626	1.66775e-13	6.58763e-12
CHPF	55.8101	3.47893	0.497227	1.70018e-13	6.70033e-12
PPBP	54.485	6.27184	0.882137	1.79708e-13	7.06603e-12
SOX13	83.998	-2.46267	0.351996	1.862e-13	7.30465e-12
PID1	1496.95	3.31562	0.475579	1.87147e-13	7.32512e-12
CST3	2412.92	-1.20421	0.169671	2.00655e-13	7.83602e-12
CUX2	44.8022	-5.85295	0.820308	2.02174e-13	7.87746e-12
PRR5L	226.311	-2.68691	0.386267	2.17078e-13	8.43909e-12
ACP2	4254.19	1.22433	0.172984	2.30238e-13	8.93056e-12
WWP1	1367.97	-0.809986	0.113041	2.36451e-13	9.15093e-12
CIITA	3056.08	-1.6376	0.233342	2.53195e-13	9.77696e-12
CCDC9B	273.741	-1.74468	0.249691	2.59265e-13	9.98896e-12
ECE1	639.222	2.2592	0.324834	2.62786e-13	1.0102e-11
CCND3	728.163	1.42538	0.202919	2.71381e-13	1.04092e-11
GAS2L3	1244.14	-1.09033	0.154306	2.9877e-13	1.14343e-11
TBC1D4	668.356	-1.11561	0.158025	3.00646e-13	1.14678e-11
LTA4H	22717.1	-1.06589	0.150823	3.00978e-13	1.14678e-11
HHEX	551.672	-1.34694	0.192042	3.08123e-13	1.17141e-11
LPAR3	45.896	3.92696	0.567518	3.33424e-13	1.26481e-11
HIPK2	7531.91	1.04262	0.148021	3.86231e-13	1.46191e-11
ZFP36L2	5347.39	-1.63047	0.235204	3.98627e-13	1.50551e-11
MROCKI	47.2355	4.05087	0.591748	4.19211e-13	1.57979e-11
TREML1	211.34	-2.59154	0.377387	4.23207e-13	1.58938e-11
L3MBTL4-AS1	58.3154	-2.91716	0.424327	4.23601e-13	1.58938e-11
EPS8	855.62	-2.10982	0.306492	4.37371e-13	1.63748e-11
APMAP	2193.6	-0.64948	0.0911619	4.49684e-13	1.67992e-11
TBC1D2	2758.6	-0.953029	0.135553	4.58488e-13	1.70911e-11
PLEKHM3	1433.5	1.14175	0.163213	4.65361e-13	1.72995e-11
CCSER1	38.3631	-2.24575	0.325113	4.66089e-13	1.72995e-11
LINC01857	124.37	-1.61391	0.233427	4.94518e-13	1.83152e-11
TCEAL9	470.435	1.93578	0.28134	5.12742e-13	1.89494e-11
SULF2	782.399	-2.40659	0.351902	5.29779e-13	1.95372e-11
PTPN1	6831.97	1.44963	0.209268	5.37697e-13	1.97868e-11
ENSG00000243089	38.2902	4.88944	0.71488	5.53777e-13	2.03351e-11
OSM	990.723	5.27852	0.778621	5.82614e-13	2.13484e-11
GLIS3	306.967	3.83939	0.56396	5.85346e-13	2.1403e-11
C1orf127	47.0088	-3.04986	0.447558	6.57243e-13	2.3981e-11
AQP9	26737.9	1.55261	0.224858	6.82187e-13	2.48385e-11
FTH1	269746	1.4965	0.213837	7.22359e-13	2.62457e-11
CPVL	3366.16	-1.76059	0.257661	7.41865e-13	2.68977e-11
B4GALT1	6079.95	1.34021	0.194598	7.85109e-13	2.84058e-11
NCF1	1010.99	1.72961	0.253446	8.59292e-13	3.10246e-11
KDM7A	3632.61	0.729433	0.10411	8.82739e-13	3.18045e-11
MYOZ1	30.2609	-2.70827	0.398855	1.06701e-12	3.83634e-11
ENSG00000291095	22.3134	9.14003	2.7801	1.13647e-12	4.07757e-11
PER3	396.409	-1.73194	0.255621	1.1598e-12	4.15261e-11
CDCA7L	330.395	-1.08043	0.157263	1.21922e-12	4.35631e-11
SPARC	903.279	-2.9057	0.433808	1.22346e-12	4.36239e-11
NCF1C	317.215	2.01186	0.298269	1.28937e-12	4.58791e-11
TNC	139.696	3.0403	0.454141	1.31992e-12	4.68696e-11
ST3GAL2	2295.66	1.05688	0.15398	1.33021e-12	4.71374e-11
RETN	68.3461	4.11358	0.616494	1.36353e-12	4.8219e-11
LDLR	5738.84	1.53331	0.226303	1.40566e-12	4.96072e-11
APP	5745.76	0.895194	0.130012	1.53009e-12	5.38879e-11
KIAA0930	8978.89	-1.38137	0.204107	1.56735e-12	5.50877e-11
MVD	1223.48	1.10873	0.162703	1.75081e-12	6.14103e-11
ZHX2	591.423	1.54091	0.228748	1.81499e-12	6.3532e-11
LIG4	974.035	0.814533	0.118468	1.90392e-12	6.65097e-11
CCNY	2054.45	-0.785684	0.11421	1.92954e-12	6.72683e-11
ENSG00000218565	38.045	3.70031	0.555723	2.03212e-12	7.07014e-11
FAM13A	535.6	-2.11423	0.317815	2.14546e-12	7.44941e-11
CORO2A	490.642	-1.72768	0.258506	2.18055e-12	7.55603e-11
CSRNP1	339.758	1.13824	0.167991	2.18766e-12	7.56543e-11
DHCR7	1385.63	1.75421	0.262389	2.19488e-12	7.57518e-11
ARSB	3137.36	1.19177	0.17626	2.25418e-12	7.7643e-11
SLC36A4	1984.89	0.784718	0.114386	2.35408e-12	8.09221e-11
APOC1	3326.34	-1.91162	0.287993	2.48716e-12	8.53266e-11
CRIM1	891.769	1.86605	0.28044	2.54541e-12	8.71205e-11
DLEU7	234.559	1.70774	0.255942	2.54957e-12	8.71205e-11
CEMIP	787.328	7.14564	1.09416	2.6763e-12	9.12697e-11
NUP98	4465.73	0.753612	0.110362	2.84288e-12	9.6759e-11
FPGS	964.543	0.886547	0.130514	2.94052e-12	9.98848e-11
SLC24A3	74.8679	4.67482	0.708678	2.95971e-12	1.00339e-10
P4HA1	2188.75	0.955538	0.141181	3.09012e-12	1.04554e-10
RPGR	395.536	1.08139	0.160639	3.19446e-12	1.07873e-10
FARP1	40.9218	-2.27723	0.344499	3.31398e-12	1.1169e-10
CTSF	46.4013	-3.57008	0.543801	3.3897e-12	1.14018e-10
TMEM86A	296.494	-1.63913	0.247554	3.53751e-12	1.18758e-10
CYRIA	1846.67	1.33329	0.199971	3.55817e-12	1.19219e-10
TMEM255A	310.309	-3.63768	0.55776	3.61582e-12	1.20916e-10
SNX24	425.895	-1.0615	0.158192	3.73604e-12	1.24694e-10
TBL1XR1	4167.75	0.859418	0.12714	3.89498e-12	1.29648e-10
ABHD12	1842.45	-0.933173	0.138557	3.89954e-12	1.29648e-10
CD4	6749.48	-1.39885	0.211235	4.35361e-12	1.44271e-10
CIPC	587.029	-0.91157	0.135535	4.3561e-12	1.44271e-10
PDLIM7	1110.37	1.40639	0.212686	4.79404e-12	1.5847e-10
MXD4	619.296	-1.38951	0.210252	4.83925e-12	1.59658e-10
SLAMF6	293.07	-1.52994	0.232226	4.85016e-12	1.59712e-10
MEI1	301.846	2.08403	0.318874	5.06791e-12	1.66564e-10
PPARG	932.842	-1.88022	0.287689	5.3195e-12	1.745e-10
ENSG00000253891	29.958	5.14498	0.77664	5.37215e-12	1.75892e-10
SNAI3	126.035	-1.59717	0.243201	5.44554e-12	1.77957e-10
FABP3	193.164	-2.96136	0.458283	6.04221e-12	1.97081e-10
DSE	4771.42	1.85926	0.285053	6.12607e-12	1.99439e-10
NAP1L1	8564.25	-0.735014	0.109351	6.3477e-12	2.06264e-10
AZIN1	4995.48	1.12315	0.169868	6.78491e-12	2.20056e-10
PXK	1506.79	1.05666	0.159485	6.96186e-12	2.25371e-10
CCDC71L	966.91	1.14423	0.173658	7.67104e-12	2.47862e-10
ABTB2	94.2996	3.042	0.473792	7.92267e-12	2.55514e-10
PLEK2	34.2042	2.50076	0.385096	7.95923e-12	2.56213e-10
TRIP10	814.925	1.58379	0.243358	8.10096e-12	2.60289e-10
ASAP2	1174.33	1.99295	0.308776	8.14963e-12	2.61365e-10
SLC37A2	7490.33	-1.57587	0.242759	8.38505e-12	2.68415e-10
DYRK2	2466.58	-1.24779	0.190582	8.57439e-12	2.73967e-10
NLRP1	1035.34	-1.80808	0.27985	9.10281e-12	2.90312e-10
SEMA4B	808.653	2.70041	0.421575	9.3978e-12	2.99166e-10
MT1A	15.3407	8.51739	2.69574	9.69601e-12	3.0809e-10
TXNRD3	51.6646	-2.8159	0.43906	9.89647e-12	3.1388e-10
ENSG00000287917	40.1735	2.88053	0.449038	1.02339e-11	3.23985e-10
HAVCR2	5118.86	-1.10122	0.168077	1.02726e-11	3.24615e-10
BCL6	3749.35	1.21266	0.185687	1.039e-11	3.27721e-10
PTCRA	33.0187	-4.55471	0.705168	1.06638e-11	3.35745e-10
EREG	703.641	3.1885	0.501512	1.16156e-11	3.65045e-10
SLC18B1	407.203	-1.95158	0.3045	1.17524e-11	3.68668e-10
DENND2B	64.2377	-2.00084	0.312555	1.29455e-11	4.05359e-10
IL6ST	5191.5	1.2464	0.192329	1.38932e-11	4.34243e-10
LILRB1	277.104	2.32659	0.36623	1.48139e-11	4.62184e-10
ARHGAP25	1974.24	-0.76888	0.11693	1.61404e-11	5.02659e-10
VILL	366.035	2.12797	0.335057	1.63054e-11	5.0688e-10
KCP	221.565	-2.93941	0.466199	1.65019e-11	5.12063e-10
ALDH5A1	144.612	-1.58673	0.248161	1.70427e-11	5.27895e-10
ENSG00000267737	24.7781	5.83852	0.87364	1.86671e-11	5.77173e-10
SLC7A8	1117.61	-2.06114	0.325653	1.87443e-11	5.7852e-10
ASTE1	211.643	-0.97433	0.150071	1.91269e-11	5.89271e-10
UBXN11	1490.56	-1.22421	0.190683	1.9285e-11	5.92873e-10
PLCB2	5391.59	-1.10721	0.171439	1.93126e-11	5.92873e-10
PTPRJ	16020.3	0.997122	0.15376	1.96365e-11	6.01743e-10
FADS3	314.334	1.20042	0.186444	1.9849e-11	6.07176e-10
ATP13A3-DT	244.468	2.12958	0.337828	2.15686e-11	6.58606e-10
HADH	431.375	-1.28767	0.201433	2.3014e-11	7.01499e-10
ACSL1	18700.1	1.67313	0.263954	2.32393e-11	7.07114e-10
GPX3	298.726	-2.57318	0.412119	2.60044e-11	7.89856e-10
RRAGD	1298.26	-1.2058	0.188885	2.67659e-11	8.11553e-10
QPCT	1965.09	2.13282	0.340127	2.68628e-11	8.13059e-10
CD52	3332.21	-2.1842	0.349626	2.82621e-11	8.53218e-10
SLC40A1	164.897	-1.97159	0.314274	2.82887e-11	8.53218e-10
LINC02015	22.4468	9.10192	2.8231	3.02356e-11	9.10344e-10
MBOAT2	339.306	1.36522	0.215683	3.24849e-11	9.76361e-10
MFSD2A	651.088	0.933264	0.145488	3.42704e-11	1.02717e-09
PPP1R21	1079.91	-0.685452	0.105648	3.42947e-11	1.02717e-09
CXCL6 (GCP-2)	96.3959	7.33282	1.16756	3.55303e-11	1.06233e-09
P2RX1	688.45	-1.16227	0.183179	3.6647e-11	1.09382e-09
NFE2L1	6319.55	1.02061	0.159976	3.72595e-11	1.11018e-09
GPR155	358.699	-1.62284	0.259718	4.12264e-11	1.22625e-09
ADGRE2	7173.5	1.35642	0.21482	4.13183e-11	1.22687e-09
MAP2K6	123.7	-2.03568	0.328143	4.41605e-11	1.30704e-09
TAFA3	29.7907	-3.65656	0.589145	4.41701e-11	1.30704e-09
CD84	18825.2	-1.19185	0.188939	4.47267e-11	1.32124e-09
EFNB1	259.616	-1.32511	0.210927	4.54396e-11	1.34e-09
DTNA	88.7145	-1.70202	0.273244	4.57855e-11	1.34789e-09
ENSG00000291236	27.7823	-5.12911	0.810281	4.68562e-11	1.37706e-09
LINC00847	699.156	-1.10094	0.17427	4.78322e-11	1.40335e-09
MAGI2-AS3	115.101	1.77031	0.285338	5.17419e-11	1.51547e-09
MAGEF1	215.135	1.58555	0.254805	5.32562e-11	1.55718e-09
ANXA11	6091.34	-1.14769	0.182755	5.60723e-11	1.63674e-09
MAML3	371.775	-1.28443	0.205458	5.72825e-11	1.66924e-09
RHOG	1999.66	0.641954	0.100083	5.93312e-11	1.72602e-09
TMEM176B	1862.62	1.54892	0.249679	6.07819e-11	1.76524e-09
RNF125	578.872	-1.53791	0.248206	6.21092e-11	1.80075e-09
LY86	1246.77	-1.61296	0.261003	6.42309e-11	1.85913e-09
CYP7B1	22.9074	5.30926	0.836755	6.55059e-11	1.89286e-09
JUNB	2194.14	0.810556	0.12764	6.65427e-11	1.91959e-09
ENPP2	1712.87	5.22304	0.863713	6.67475e-11	1.92228e-09
WIPF3	24.2503	-4.45913	0.717097	7.05812e-11	2.0293e-09
EEPD1	518.181	-2.76884	0.456056	7.21091e-11	2.06977e-09
GUSB	2139.02	-1.14242	0.183143	7.56555e-11	2.1662e-09
SH3BGRL	5768.23	-0.953723	0.151874	7.57201e-11	2.1662e-09
ENSG00000229771	31.7429	-4.48264	0.730455	7.83797e-11	2.23857e-09
TIMP4	155.081	-1.95554	0.319907	7.98922e-11	2.27798e-09
LINC03025	92.8035	7.21833	1.18389	8.24688e-11	2.34757e-09
CEBPA-DT	62.8581	-1.5791	0.257088	9.13711e-11	2.59669e-09
TIMP2	9436.77	-0.741507	0.117268	9.3505e-11	2.65296e-09
FOSL2	7795.02	2.27379	0.373535	9.68526e-11	2.74341e-09
ACSS1	699.1	-1.30762	0.212202	9.77826e-11	2.76521e-09
ADRB2	88.7998	-2.23943	0.369506	9.79872e-11	2.76645e-09
SLC30A1	6686.19	1.03797	0.167072	1.00169e-10	2.82343e-09
MAMLD1	114.797	2.8986	0.481649	1.02803e-10	2.89294e-09
SLC22A4	194.786	1.71738	0.28163	1.06079e-10	2.98024e-09
MAPRE3	213.465	1.41407	0.230637	1.08478e-10	3.04268e-09
CHST13	29.2915	-2.62916	0.433461	1.09436e-10	3.06301e-09
FURIN	2964.61	0.725933	0.115213	1.09558e-10	3.06301e-09
GALM	2068.31	-2.26324	0.375851	1.11586e-10	3.11465e-09
NPLOC4	2936.98	0.58727	0.0926353	1.13907e-10	3.17427e-09
TMEM165	2872.34	0.799346	0.127547	1.18329e-10	3.29217e-09
C2CD2	423.552	-0.949512	0.152843	1.2128e-10	3.36883e-09
TMEM41B	1334.35	0.931088	0.149753	1.24409e-10	3.45021e-09
TMEM164	3075.6	-0.636792	0.101045	1.2671e-10	3.50837e-09
SMOX	246.991	1.58358	0.260401	1.27485e-10	3.52416e-09
SLC2A9	283.68	-1.40837	0.230955	1.31065e-10	3.6173e-09
ENSG00000289331	28.783	2.47142	0.41024	1.34315e-10	3.70107e-09
ADGRE1	2508.2	5.14993	0.868712	1.37905e-10	3.79393e-09
SOCS1	28.5719	2.17195	0.358974	1.39414e-10	3.82933e-09
HSD3B7	1320.08	-1.50227	0.247924	1.49733e-10	4.10621e-09
ENSG00000251194	75.3608	1.7746	0.294431	1.50269e-10	4.11437e-09
ST6GAL1	2579.07	-1.38976	0.22921	1.53495e-10	4.19601e-09
PVR	814.194	1.22236	0.200103	1.5564e-10	4.24792e-09
METTL7A	1872.8	-1.72536	0.28656	1.57439e-10	4.29021e-09
RPH3A	16.8904	-8.5154	2.80961	1.5822e-10	4.30469e-09
FXYD6	302.501	-2.07008	0.345783	1.60901e-10	4.37071e-09
LINC02981	35.6688	-1.84217	0.305266	1.64181e-10	4.45281e-09
STEAP3	2279.98	1.4107	0.233076	1.65243e-10	4.47455e-09
LAMB1	33.0986	3.14302	0.529875	1.70625e-10	4.61303e-09
LRPAP1	2779.78	-0.668543	0.10711	1.77078e-10	4.78e-09
GGH	266.042	1.3415	0.221179	1.79296e-10	4.8323e-09
ANPEP	16560.9	1.68466	0.282728	1.80457e-10	4.85598e-09
PLEKHG3	593.185	2.05123	0.343683	1.86033e-10	4.99823e-09
FBLN5	29.708	-5.52091	0.900835	1.89527e-10	5.08417e-09
RCBTB2	1889.67	-1.51806	0.252263	1.90897e-10	5.11294e-09
ENSG00000289977	127.726	-1.55585	0.259146	2.04091e-10	5.45784e-09
H1-0	2647.33	1.1963	0.197264	2.08189e-10	5.5588e-09
DYNLT5	66.9477	2.85254	0.483415	2.10698e-10	5.6171e-09
C1orf122	399.549	1.26667	0.209451	2.14924e-10	5.7209e-09
SNHG15	389.803	0.788009	0.1278	2.28455e-10	6.07169e-09
PDHX	665.28	0.839264	0.136636	2.37826e-10	6.31099e-09
RPL7AP64	171.725	-1.51761	0.254081	2.57715e-10	6.82827e-09
MAZ	2018.81	-0.808941	0.131846	2.58452e-10	6.83727e-09
F13A1	175.781	-5.87852	1.01131	2.61191e-10	6.89912e-09
ACSL4	10874.7	1.11603	0.185359	2.81917e-10	7.43519e-09
PTPN2	2704.4	1.3223	0.220706	2.85106e-10	7.50779e-09
HPS3	1688.36	-0.769842	0.125701	2.9968e-10	7.87953e-09
MEF2C	1471.12	-1.32622	0.222451	3.28116e-10	8.6068e-09
SLC12A6	4628.43	-0.652737	0.105685	3.2834e-10	8.6068e-09
CLU	252.629	4.82827	0.835429	3.33483e-10	8.72832e-09
DEPTOR	19.8563	-4.15711	0.69467	3.34103e-10	8.7313e-09
CACNA2D3	31.3895	-2.89764	0.494287	3.38939e-10	8.84425e-09
LPAR4	30.4841	4.04893	0.692248	3.88748e-10	1.01286e-08
KLF2	115.171	-1.4264	0.241415	4.08717e-10	1.06328e-08
TNIP2	811.952	0.76281	0.125586	4.2848e-10	1.11301e-08
ENSG00000286225	44.2152	5.694	0.967699	4.40253e-10	1.14187e-08
ANKH	540.727	-1.68988	0.289382	4.89276e-10	1.26675e-08
ATG4C	775.544	-0.747789	0.123527	4.90425e-10	1.26675e-08
APOL3	1149.34	2.09831	0.361489	4.90605e-10	1.26675e-08
CCL22 (MDC)	16936.4	1.69484	0.290057	4.97824e-10	1.28346e-08
CHPT1	571.869	-1.05283	0.177029	5.3264e-10	1.37057e-08
NDST1	2880.18	0.868129	0.144622	5.33202e-10	1.37057e-08
CD244	143.814	-2.20654	0.382288	5.55758e-10	1.42642e-08
STK26	747.407	1.27414	0.216527	5.79293e-10	1.48461e-08
STUM	94.3268	-1.8867	0.325602	5.81549e-10	1.48653e-08
MB21D2	257.278	2.18288	0.378432	5.81769e-10	1.48653e-08
ELOVL5	5796.6	0.791831	0.131706	5.90554e-10	1.50633e-08
MYO1E	4219.42	-1.56757	0.269215	5.91266e-10	1.50633e-08
DUSP4	185.431	2.20893	0.383619	6.11158e-10	1.55429e-08
OSBPL1A	829.115	-1.21579	0.206678	6.11897e-10	1.55429e-08
DRAM1	5857.65	1.75361	0.301849	6.22434e-10	1.57873e-08
TNFAIP8	2780.1	0.904919	0.151651	6.40492e-10	1.62214e-08
ELMO1	1251.95	-0.657584	0.108886	6.48691e-10	1.64049e-08
MVP	3946.43	0.962227	0.161911	6.51134e-10	1.64426e-08
MCTP1	1885	1.0357	0.174944	6.53692e-10	1.6483e-08
ZNF697	1019.63	1.11273	0.188617	6.57187e-10	1.65347e-08
TM9SF4	3152.51	0.916851	0.154007	6.57664e-10	1.65347e-08
SCG3	43.1304	3.39997	0.595406	6.6351e-10	1.66574e-08
MGAM	31.871	2.66263	0.463743	6.88853e-10	1.72684e-08
IL16	1625.42	-1.02171	0.17302	7.14488e-10	1.7885e-08
SLC27A1	928.308	-1.04236	0.17712	7.81777e-10	1.9541e-08
CTDSPL	200.815	-1.66313	0.288586	7.91631e-10	1.97586e-08
TRAF2	298.305	0.808947	0.135832	8.04053e-10	2.00396e-08
LRRK2	3995.65	1.54104	0.267586	8.06945e-10	2.00827e-08
ATP1B1	1170.67	-2.16804	0.380094	8.13419e-10	2.02146e-08
MAP3K3	2741.59	-0.603877	0.100437	8.28109e-10	2.055e-08
TFEB	688.7	-0.632962	0.105368	8.32015e-10	2.06172e-08
PARP12	1778.76	0.866535	0.146163	8.38848e-10	2.07567e-08
CASP4	2504.13	1.09955	0.187633	8.45142e-10	2.08824e-08
CNPY3	2496.29	-0.586761	0.0975662	8.72866e-10	2.15365e-08
IRF2BP2	4589.67	0.644242	0.107535	9.15423e-10	2.25542e-08
RHOC	638.188	-0.720476	0.120875	9.20521e-10	2.26475e-08
CCDC134	717.076	0.951461	0.161687	9.37817e-10	2.30401e-08
KREMEN1	414.924	4.55723	0.81295	9.43523e-10	2.31472e-08
ZNRF1	170.14	0.92846	0.157658	9.53042e-10	2.33475e-08
TLR2	6018.93	1.34093	0.231876	9.87846e-10	2.41657e-08
IDO2	63.5322	3.24267	0.57665	1.00792e-09	2.46217e-08
STMN1	331.628	-1.92601	0.338759	1.00973e-09	2.46311e-08
ADPRH	733.908	0.953373	0.162595	1.06311e-09	2.58966e-08
SGK1	11686.8	-1.35511	0.235193	1.06608e-09	2.59323e-08
PTGER4	1386.1	0.972708	0.166241	1.10495e-09	2.68398e-08
PLD2	1028.15	0.930967	0.159059	1.1669e-09	2.83047e-08
R3HDM4	673.328	0.752744	0.127345	1.19444e-09	2.8932e-08
KCNN4	1088.46	1.19438	0.206797	1.22355e-09	2.95916e-08
RGS16	108.774	2.46953	0.439298	1.22511e-09	2.95916e-08
ATXN1	3485.31	0.819092	0.139367	1.26346e-09	3.04489e-08
DTX2	303.215	1.69126	0.297552	1.26414e-09	3.04489e-08
PRKAA1	2258.85	0.847968	0.144473	1.28749e-09	3.09681e-08
DNAJA1	6523.61	0.90495	0.154871	1.32257e-09	3.17675e-08
MINK1	3400.01	0.849059	0.144862	1.3326e-09	3.19638e-08
PSD3	1497.95	1.96068	0.348387	1.42004e-09	3.40138e-08
AIFM2	408.577	1.46914	0.258253	1.49264e-09	3.57032e-08
STXBP5-AS1	156.321	2.18073	0.389165	1.51008e-09	3.60703e-08
IQGAP2	6547.53	-1.1105	0.192979	1.52602e-09	3.64004e-08
NCAPH	62.2516	-1.54883	0.273505	1.65978e-09	3.95363e-08
FKBP4	2825.85	1.00888	0.17482	1.67583e-09	3.98634e-08
ITGA4	2416.68	-1.31257	0.230828	1.72034e-09	4.08657e-08
ABTB3	150.275	2.3276	0.417602	1.73462e-09	4.11482e-08
HIVEP1	1867.12	1.07418	0.187119	1.80157e-09	4.26777e-08
STOM	7752.13	2.20838	0.395844	1.81993e-09	4.30534e-08
ACSM5	22.2598	-4.10028	0.731348	2.02704e-09	4.7887e-08
TNFRSF4	48.4318	3.05371	0.554332	2.07955e-09	4.90599e-08
LINC00937	240.551	2.72425	0.49368	2.08238e-09	4.90599e-08
IQCH-AS1	203.089	-1.18456	0.208472	2.12549e-09	5.00072e-08
DENND5A	6087.88	1.21201	0.214221	2.13749e-09	5.02087e-08
EPHX1	367.686	-1.64038	0.293228	2.13989e-09	5.02087e-08
CEP170B	61.6031	2.07017	0.371676	2.1462e-09	5.02883e-08
CASC15	59.8013	4.04161	0.739947	2.25127e-09	5.26126e-08
RHBDD2	975.42	1.99835	0.359832	2.25151e-09	5.26126e-08
PFKFB3	6699.26	2.12606	0.381627	2.26679e-09	5.28978e-08
STK17B	1971.86	1.1328	0.199465	2.28989e-09	5.33647e-08
LUCAT1	1071.55	1.56223	0.279158	2.31196e-09	5.38061e-08
C1S	134.9	3.27427	0.597806	2.31862e-09	5.38884e-08
DDIAS	218.931	-2.24576	0.40718	2.32808e-09	5.40353e-08
GLT1D1	559.67	1.46888	0.262036	2.4045e-09	5.57339e-08
CAMSAP2	1404.15	0.78265	0.1354	2.41945e-09	5.6005e-08
TMEM150B	529.673	1.37338	0.244304	2.43015e-09	5.61773e-08
ENSG00000288952	112.197	-2.0923	0.37857	2.43405e-09	5.6192e-08
SLC5A3	8892.16	1.22878	0.217193	2.46436e-09	5.68156e-08
CLEC2B	662.176	-0.887085	0.154757	2.55589e-09	5.88469e-08
RELT	1226.78	0.899889	0.157187	2.66778e-09	6.13411e-08
MARVELD1	733.97	-1.44763	0.259256	2.6899e-09	6.17672e-08
HDGF	6168.29	0.787043	0.136575	2.70295e-09	6.19843e-08
HRH2	1569.02	1.80484	0.3262	2.84255e-09	6.5099e-08
KCNH3	19.7646	-4.59928	0.815133	2.88203e-09	6.59155e-08
BHLHE41	2719.13	1.44468	0.259186	2.94981e-09	6.73761e-08
PACS1	1750.21	-0.619064	0.106701	2.97665e-09	6.78993e-08
CCDC88A	19430.5	-0.743468	0.129414	3.16401e-09	7.20774e-08
ENSG00000261222	44.2391	3.86217	0.714629	3.21057e-09	7.30415e-08
AGO1	4261.02	-0.587291	0.101233	3.23726e-09	7.33922e-08
AMDHD2	507.821	-1.0733	0.190464	3.24109e-09	7.33922e-08
TUBA1C	3026.45	1.12316	0.20024	3.24184e-09	7.33922e-08
ENSG00000282386	39.6698	1.735	0.314042	3.24303e-09	7.33922e-08
GRN	15332.9	-0.897708	0.158223	3.28275e-09	7.41101e-08
USB1	1794.88	0.867548	0.152187	3.28336e-09	7.41101e-08
P2RY11	203.578	-1.60543	0.290741	3.3469e-09	7.54454e-08
MYO1C	1169.9	1.44615	0.260518	3.35831e-09	7.56007e-08
LOXL3	667.651	-0.937047	0.16529	3.36257e-09	7.56007e-08
GNA12	4504.77	0.741006	0.129112	3.39412e-09	7.62106e-08
PPP3CC	535.634	1.05766	0.187797	3.49593e-09	7.83945e-08
SHROOM3	24.8286	5.09714	0.913073	3.52385e-09	7.89177e-08
BBLN	200.617	-0.877334	0.15448	3.58511e-09	8.01855e-08
LINC01094	656.62	1.70557	0.31007	3.59109e-09	8.0215e-08
PEDS1	795.89	0.873171	0.15372	3.72298e-09	8.30532e-08
MICALL1	662.859	0.975531	0.17286	3.7381e-09	8.32828e-08
VDR	1416.77	1.06817	0.190191	3.74837e-09	8.34036e-08
CCL19 (MIP-3β)	15.5804	6.42978	1.36425	4.08665e-09	9.08133e-08
PLD4	58.0337	-2.0693	0.380705	4.19146e-09	9.30223e-08
ENSG00000290242	37.0312	-2.95008	0.546325	4.2045e-09	9.31917e-08
YIPF6	1050.58	0.608272	0.105864	4.33572e-09	9.59766e-08
CENPBD2P	463.99	0.729696	0.128056	4.42549e-09	9.78381e-08
CSTA	1137.38	0.858788	0.151739	4.51675e-09	9.97274e-08
ETS2	1976.55	1.58195	0.289101	4.52937e-09	9.98782e-08
SLC23A2	2656.59	-0.820676	0.145093	4.5522e-09	1.00253e-07
TIMP1	5342.49	1.83518	0.336423	4.63457e-09	1.01937e-07
SOCS2	38.6572	2.64408	0.490416	4.99807e-09	1.09792e-07
UBE2D1	1261.03	1.13443	0.204698	5.16728e-09	1.13364e-07
PPA1	1915.18	1.72592	0.317554	5.22147e-09	1.14407e-07
PLP2	2152.25	1.19221	0.215806	5.2312e-09	1.14475e-07
APOL1	456.303	1.19268	0.215877	5.24993e-09	1.1471e-07
NPL	8192.13	-0.936978	0.167601	5.25527e-09	1.1471e-07
WNT5A	388.977	4.8178	0.911662	5.26914e-09	1.14867e-07
FAM20A	4376.25	2.22778	0.412722	5.29598e-09	1.15307e-07
SLC2A5	115.824	-1.93239	0.357943	5.34959e-09	1.16327e-07
CLYBL	143.522	-1.28487	0.233831	5.46086e-09	1.18596e-07
TANC2	728.558	-0.830243	0.147687	5.48208e-09	1.18907e-07
ITGA9	57.3076	-4.04599	0.762172	5.52659e-09	1.19722e-07
ADRA2B	138.101	-1.79576	0.332639	5.85224e-09	1.26617e-07
ENSG00000250041	55.5735	-1.61799	0.298056	5.87796e-09	1.27014e-07
EPHB6	58.1865	-1.55215	0.285473	5.97864e-09	1.29028e-07
MAP4K3	997.826	-0.836668	0.149434	6.14057e-09	1.32357e-07
TMPO	2629.1	0.784253	0.139616	6.27136e-09	1.35007e-07
WDR91	1171.4	-0.9485	0.17074	6.33566e-09	1.36221e-07
MS4A7	15735.2	1.27342	0.232656	6.37609e-09	1.36919e-07
LINC01619	50.6665	1.86134	0.345862	6.54822e-09	1.4044e-07
LINC01303	58.3466	3.15243	0.596165	6.91594e-09	1.48142e-07
DBP	93.9457	-1.49655	0.276524	6.96778e-09	1.49067e-07
IKBKE	1677.64	0.799794	0.142656	6.98192e-09	1.49184e-07
NT5DC2	691.539	1.73727	0.323214	6.99249e-09	1.49225e-07
SLC47A1	105.192	-3.19848	0.606973	7.07093e-09	1.50712e-07
ARMC2	111.001	-1.50288	0.27826	7.21474e-09	1.53588e-07
RILPL2	1527.45	1.20851	0.221138	7.23814e-09	1.53895e-07
ICAM4	36.7508	-2.40046	0.451127	7.31316e-09	1.55299e-07
SLC7A7	6501.48	0.62198	0.109913	7.3254e-09	1.55367e-07
LIMD1	1754.93	-0.689992	0.122753	7.34249e-09	1.55538e-07
MACROH2A1	14097.1	-0.719428	0.12919	7.74606e-09	1.63885e-07
MITF	2844.29	-1.65997	0.310917	8.66492e-09	1.83101e-07
SRGAP3	95.9731	-1.68787	0.316672	9.27585e-09	1.9577e-07
FDPS	4038.38	0.976247	0.177985	9.56333e-09	2.01591e-07
TUBE1	284.868	0.969971	0.17708	9.76656e-09	2.05623e-07
WNK2	24.6594	2.97449	0.565064	9.83038e-09	2.06714e-07
PNMA1	873.64	1.03626	0.190024	9.9387e-09	2.08737e-07
RASSF5	2353.48	0.482478	0.0854546	1.01385e-08	2.12674e-07
LDLRAD4	868.952	-1.24284	0.230621	1.01804e-08	2.13293e-07
FOLR2	16.9888	-4.0956	0.762706	1.02138e-08	2.13732e-07
TPM2	92.288	-1.73421	0.32709	1.02744e-08	2.14739e-07
ANKRD33B	249.676	1.56645	0.293989	1.04005e-08	2.17112e-07
INSIG2	889.518	1.25021	0.232294	1.0746e-08	2.24053e-07
EVL	5638.95	-1.98553	0.379079	1.08154e-08	2.25227e-07
TNS1	2286.41	-1.03519	0.190647	1.09688e-08	2.28145e-07
PALLD	1990.02	-1.68982	0.319432	1.11467e-08	2.31566e-07
ADAMTS14	194.628	6.16108	1.20664	1.15449e-08	2.3955e-07
CCSAP	1126.99	-0.739544	0.134013	1.19119e-08	2.46868e-07
PIM2	499.437	1.71368	0.324953	1.24186e-08	2.57059e-07
CAMK1D	1315.13	-1.35183	0.253744	1.24813e-08	2.58047e-07
DMXL2	28246.7	1.12114	0.208758	1.25878e-08	2.59936e-07
PARP10	1036.04	1.14754	0.213436	1.26636e-08	2.61189e-07
PHETA1	300.302	-1.20345	0.224594	1.28194e-08	2.64085e-07
DENND3	1744.97	0.920968	0.169645	1.29318e-08	2.66082e-07
ABCA2	528.316	-1.02798	0.190264	1.29527e-08	2.66195e-07
MCTP2	830.949	3.7316	0.725413	1.29977e-08	2.66802e-07
ENSG00000286511	37.4727	1.79046	0.339977	1.35397e-08	2.77595e-07
CD109	1181.93	-1.40344	0.264876	1.38274e-08	2.83157e-07
GALNT12	314.722	-1.65912	0.315824	1.4007e-08	2.86495e-07
CRACDL	33.3722	-1.99298	0.380408	1.4043e-08	2.86891e-07
INPP5F	980.181	-0.89691	0.165183	1.42229e-08	2.90221e-07
PNKD	3372.03	1.4892	0.282298	1.43565e-08	2.926e-07
SHKBP1	2534.04	0.643714	0.116522	1.45188e-08	2.95559e-07
AFAP1L1	58.1917	-2.9492	0.572581	1.46073e-08	2.97009e-07
KLHL28	856.169	0.761048	0.138972	1.468e-08	2.98135e-07
SIK3	1905.51	0.984225	0.182452	1.52972e-08	3.10304e-07
UBALD2	612.623	1.24937	0.235081	1.56928e-08	3.17954e-07
SHROOM4	36.3074	2.00836	0.385692	1.6524e-08	3.34402e-07
ENSG00000283213	9.23457	-7.43473	2.68067	1.66959e-08	3.37485e-07
PNP	2106.72	0.988065	0.183891	1.69188e-08	3.41589e-07
SELENOK	968.911	0.991679	0.184664	1.6966e-08	3.42018e-07
CRTAP	3014.39	-0.808808	0.148972	1.69798e-08	3.42018e-07
MVP-DT	51.9689	2.53139	0.491394	1.72523e-08	3.47102e-07
SLA	5891.6	0.799815	0.14727	1.74785e-08	3.51242e-07
RFTN1	2564.7	0.982967	0.183094	1.77529e-08	3.5634e-07
NAB2	705.68	-0.885871	0.164312	1.79911e-08	3.60701e-07
IGFN1	62.9092	2.62319	0.510832	1.82513e-08	3.65493e-07
FAM81A	30.6936	-2.60788	0.507159	1.90345e-08	3.80733e-07
XBP1	3648.19	0.868677	0.161257	1.94828e-08	3.89249e-07
LEP	21.9767	-6.70744	1.4892	1.97621e-08	3.94371e-07
ABHD17C	179.202	2.841	0.557999	2.01927e-08	4.02499e-07
HIP1	976.926	1.50095	0.288259	2.10149e-08	4.18404e-07
ADAM7-AS1	38.8651	2.57406	0.50302	2.11235e-08	4.20079e-07
GK5	1241.69	1.62234	0.314219	2.15948e-08	4.28957e-07
MRTFB	1109.77	-0.92356	0.17283	2.17716e-08	4.31594e-07
ALK	12.2095	-7.88027	2.7896	2.17777e-08	4.31594e-07
DYNLT3	635.43	0.792391	0.146864	2.18028e-08	4.31595e-07
FPR1	2468.52	4.28055	0.852657	2.27837e-08	4.50494e-07
DESI1	1109.24	0.993698	0.187068	2.33624e-08	4.61407e-07
PNRC1	5363.35	1.88348	0.367417	2.36979e-08	4.67497e-07
PDE3B	913.307	-1.22033	0.233054	2.40672e-08	4.74239e-07
KCNMB4	50.1599	-2.69018	0.530931	2.42235e-08	4.76438e-07
CTSV	80.3937	-2.46512	0.48577	2.42341e-08	4.76438e-07
NF1	2617.64	0.965748	0.181839	2.45015e-08	4.81145e-07
GCAT	49.6079	2.50788	0.493266	2.57933e-08	5.05936e-07
ENSG00000234424	21.9367	-2.18075	0.425065	2.60585e-08	5.10557e-07
CSF3	15.623	8.37124	2.84242	2.61187e-08	5.11154e-07
ZFAND3	2175	0.68417	0.126801	2.65176e-08	5.179e-07
MARS1	3284.27	0.491458	0.0898796	2.65235e-08	5.179e-07
PLEKHG4	96.3705	-1.55143	0.300995	2.66316e-08	5.19421e-07
PLXDC2	11229.1	-1.04347	0.19825	2.67651e-08	5.21435e-07
SC5D	2665.02	0.890801	0.16743	2.68056e-08	5.21635e-07
SNX25	192.096	1.76513	0.345181	2.83234e-08	5.50547e-07
PCSK5	318.795	0.866151	0.162889	2.88284e-08	5.59733e-07
SDC3	1133.67	-1.55123	0.302496	2.94819e-08	5.71776e-07
RGS18	511.63	-1.89263	0.372858	3.02222e-08	5.85475e-07
NFATC3	1816.13	-0.657916	0.122181	3.03029e-08	5.86377e-07
FRMD4B	696.22	-1.42917	0.277954	3.15658e-08	6.1013e-07
MS4A4E	18.7416	-3.1136	0.613351	3.18102e-08	6.14164e-07
TFE3	2458.93	0.580039	0.107282	3.2122e-08	6.19491e-07
TMEM92-AS1	15.5928	3.40961	0.666419	3.23536e-08	6.23259e-07
IL18BP	878.535	-2.07087	0.410908	3.28904e-08	6.32891e-07
USP13	174.004	1.83988	0.362923	3.32382e-08	6.38871e-07
APOO	228.156	1.00879	0.192673	3.47637e-08	6.67447e-07
IL31RA	122.292	2.5586	0.511339	3.52283e-08	6.75615e-07
COQ10B	871.806	0.836022	0.158311	3.70343e-08	7.09411e-07
ABHD15	382.172	-0.74792	0.140798	3.70729e-08	7.09411e-07
AKT1	2157.04	-0.551065	0.102337	3.78297e-08	7.23089e-07
RASGRP3	2343.76	-0.821671	0.155745	3.79646e-08	7.24863e-07
PPIF	1911.17	0.825562	0.156348	3.84853e-08	7.33991e-07
PIM3	1708.02	1.01887	0.195641	3.91711e-08	7.46244e-07
VOPP1	1215.46	0.572836	0.106612	3.95079e-08	7.51314e-07
PPP1R37	385.934	-0.787167	0.148747	3.95245e-08	7.51314e-07
BIRC3	3139.99	1.0762	0.20717	3.98261e-08	7.56214e-07
MMP7	808.984	1.99934	0.398428	4.00204e-08	7.59066e-07
PPM1E	44.9726	-2.1793	0.435542	4.0431e-08	7.66009e-07
CDKN2D	118.875	1.6427	0.324657	4.0977e-08	7.75502e-07
FCGRT	2959.14	-0.774278	0.146639	4.11212e-08	7.77375e-07
ENSG00000273824	32.6529	3.61959	0.734055	4.17881e-08	7.89117e-07
IL6R	3605.12	-0.605917	0.11338	4.24431e-08	8.00071e-07
PANX1	718.538	1.07457	0.207619	4.24611e-08	8.00071e-07
CLEC5A	3662.05	2.47529	0.498102	4.39754e-08	8.27699e-07
AVPI1	288.213	-0.973787	0.187374	4.4138e-08	8.29853e-07
MBD4	2468.59	0.699997	0.132062	4.43114e-08	8.32203e-07
TANK	2637.32	0.849068	0.161868	4.44443e-08	8.3379e-07
RDH11	2949.14	0.745871	0.141301	4.53809e-08	8.50435e-07
SLC25A37	1604.3	1.75033	0.349568	4.65244e-08	8.70917e-07
GCNT4	22.9686	2.00389	0.399619	4.7242e-08	8.83389e-07
SQLE	3603.26	0.991146	0.191413	4.81892e-08	8.99375e-07
SMURF1	861.322	0.476562	0.0887262	4.82013e-08	8.99375e-07
TXN	2276	1.07523	0.209119	4.83382e-08	8.99988e-07
SCO2	222.623	1.20479	0.235656	4.83387e-08	8.99988e-07
TBC1D30	114.749	1.72635	0.344679	4.85689e-08	9.02334e-07
CD226	534.552	1.68775	0.336296	4.85695e-08	9.02334e-07
TBK1	2042.75	1.04528	0.202612	4.86711e-08	9.02938e-07
KLHDC7B-DT	25.5309	3.07348	0.621632	4.87068e-08	9.02938e-07
USP2	161.482	-1.50882	0.29932	4.94355e-08	9.15461e-07
C16orf54	404.627	-1.04408	0.202712	4.98947e-08	9.22972e-07
PARVG	4965.54	-0.781207	0.149059	5.12113e-08	9.4631e-07
PLIN2	2575.6	-1.55698	0.309807	5.24332e-08	9.67851e-07
CPD	8374.38	1.23478	0.242832	5.45529e-08	1.0059e-06
A4GALT	42.5086	2.95898	0.604997	5.4653e-08	1.00667e-06
CLEC6A	233.329	4.56277	0.943713	5.60969e-08	1.03216e-06
RNF166	1109.95	-0.894162	0.17267	5.63524e-08	1.03575e-06
GCHFR	172.56	-1.23459	0.243445	5.74973e-08	1.05567e-06
C5orf22	1064.09	0.697824	0.132967	5.91456e-08	1.0838e-06
CMBL	14.2885	-3.0999	0.618963	5.91551e-08	1.0838e-06
RAI14	575.851	1.459	0.290798	5.99773e-08	1.09769e-06
VAV2	503.017	-0.613048	0.116153	6.01382e-08	1.09947e-06
GK4P	16.8501	2.63384	0.531118	6.3462e-08	1.15901e-06
NR3C1	5314.99	0.869876	0.168298	6.36141e-08	1.16055e-06
RAB13	424.528	1.22194	0.241918	6.62272e-08	1.20695e-06
CBR3-AS1	51.0499	-1.86032	0.376916	6.6887e-08	1.21768e-06
HSD17B14	103.533	-1.36059	0.271877	6.9526e-08	1.26439e-06
ZNF319	307.155	0.960598	0.187871	7.20248e-08	1.30845e-06
LINC00963	2263.02	-0.632201	0.120793	7.24262e-08	1.31436e-06
LRRC32	147.762	2.74841	0.568022	7.30132e-08	1.32361e-06
RMDN2	233.56	-0.772546	0.14919	7.31014e-08	1.32382e-06
PBX3	703.956	-0.782275	0.151286	7.37983e-08	1.33504e-06
DYRK3	98.7915	1.65358	0.334484	7.47377e-08	1.35061e-06
LILRA1	98.9863	1.25691	0.250336	7.49574e-08	1.35316e-06
SEMA4C	101.782	1.80882	0.367716	7.64564e-08	1.37878e-06
ZDHHC7	4199.31	-0.563774	0.107345	7.66434e-08	1.3807e-06
EHBP1L1	9682.1	0.747053	0.144338	8.03749e-08	1.44641e-06
BLNK	751.127	-0.86411	0.168936	8.36348e-08	1.50351e-06
ADK	582.218	-0.862959	0.168744	8.47297e-08	1.5216e-06
ING2	238.698	-0.9633	0.189799	8.51788e-08	1.52807e-06
DPP7	1312.5	-0.517418	0.0985914	8.62281e-08	1.54529e-06
PRELID2P1	36.2092	1.62125	0.328914	8.8321e-08	1.58115e-06
FAM78A	1875.47	-0.892017	0.175213	8.93526e-08	1.59795e-06
RHOBTB2	728.655	-1.63949	0.334698	8.96725e-08	1.60201e-06
ACSL3	6054.69	0.917147	0.180247	9.03417e-08	1.6123e-06
MSMO1	3645.46	0.98752	0.196075	9.21144e-08	1.64223e-06
IL4R	2910.81	0.72075	0.140034	9.22136e-08	1.6423e-06
CXCL13 (BLC)	36.1659	4.8071	1.00787	9.33282e-08	1.66043e-06
ESYT1	2146.84	-0.609087	0.117291	9.54188e-08	1.69588e-06
GATM	208.107	-1.9051	0.393065	9.66187e-08	1.71543e-06
TNS3	10229.1	0.64978	0.125513	9.6815e-08	1.71715e-06
CIAO2A	1739.71	-0.553826	0.106327	9.87134e-08	1.74901e-06
GYS1	775.771	0.602758	0.116175	1.0068e-07	1.78202e-06
CDKN2AIP	765.39	-0.730399	0.142439	1.022e-07	1.80707e-06
ITM2B	7906.65	-0.566877	0.109135	1.03895e-07	1.83516e-06
SPPL2A	5328.55	0.757225	0.148013	1.05222e-07	1.85669e-06
DIAPH2	1459.38	0.604575	0.116755	1.0588e-07	1.86461e-06
PLXND1	9653.77	0.579786	0.111751	1.05887e-07	1.86461e-06
SSBP2	306.122	-0.82208	0.16167	1.0658e-07	1.87488e-06
SMG9	1083.01	0.584744	0.112852	1.08338e-07	1.90388e-06
CD48	4879.92	1.14918	0.230776	1.0852e-07	1.90514e-06
TMEM120A	416.174	0.689779	0.134332	1.1025e-07	1.93352e-06
RET	82.4588	-2.21145	0.462082	1.13848e-07	1.9946e-06
SDC1	35.7871	-1.53561	0.31405	1.1585e-07	2.0276e-06
PTGIR	699.462	1.5942	0.328033	1.16724e-07	2.04083e-06
ERP29	2300.3	-0.739534	0.1451	1.19078e-07	2.07988e-06
AKR1B1	1348.84	0.923897	0.183738	1.20488e-07	2.10238e-06
UGP2	3962.05	0.78456	0.154452	1.23005e-07	2.14412e-06
MAP4K3-DT	238.742	-1.13434	0.229177	1.23282e-07	2.14678e-06
FBRS	2440.56	0.546646	0.105762	1.26242e-07	2.1961e-06
GGA2	3919.41	-0.768091	0.151265	1.272e-07	2.21053e-06
SNX20	1766.57	0.825594	0.163444	1.30523e-07	2.26599e-06
ENSG00000237927	54.8459	3.14715	0.670037	1.33112e-07	2.30822e-06
PI4K2A	2451.57	-0.539978	0.104687	1.33223e-07	2.30822e-06
IL15RA	159.147	2.28523	0.481638	1.39802e-07	2.41978e-06
ZBTB33	1834.82	-0.587315	0.114499	1.41109e-07	2.43994e-06
STX10	831.57	-0.525316	0.102026	1.42322e-07	2.45844e-06
GIMAP7	272.276	-1.20947	0.24697	1.44555e-07	2.49452e-06
IRF8	4148.04	-0.546936	0.106255	1.46317e-07	2.52239e-06
AHNAK	90802.1	-0.899273	0.180129	1.46889e-07	2.52971e-06
MTMR1	558.01	-0.553919	0.107926	1.49267e-07	2.5681e-06
CLCF1	236.65	0.98966	0.19947	1.50146e-07	2.58065e-06
IFNAR1	9246.24	0.741738	0.146737	1.51038e-07	2.5934e-06
DUSP5	678.31	1.32647	0.272875	1.51607e-07	2.60057e-06
SPTBN4	19.1732	-2.5523	0.536435	1.53265e-07	2.6264e-06
PANX2	45.7969	2.67448	0.570458	1.55304e-07	2.6587e-06
SH3RF1	249.811	-0.88443	0.177333	1.56754e-07	2.68086e-06
JMJD6	766.207	0.616598	0.120955	1.5758e-07	2.69231e-06
HSD17B4	6797.83	-0.750424	0.149127	1.61911e-07	2.76356e-06
NXPE3	1462.58	0.60651	0.118999	1.6215e-07	2.7649e-06
PADI2	239.471	-1.76129	0.370072	1.63895e-07	2.79189e-06
FTH1P20	33.9942	1.69518	0.355047	1.67485e-07	2.85022e-06
TMEM117	64.1848	-1.17621	0.240883	1.69056e-07	2.87413e-06
ENSG00000253593	21.491	3.36505	0.721906	1.71182e-07	2.90739e-06
NFKBIE	1599.71	0.769807	0.153328	1.72171e-07	2.9196e-06
ECI2	450.165	-0.718467	0.142664	1.7224e-07	2.9196e-06
TMEM205	736.369	0.887606	0.178622	1.75027e-07	2.96392e-06
KLHDC8B	743.441	-2.25255	0.481968	1.86449e-07	3.15424e-06
TP53I3	331.975	-1.01837	0.20767	1.87598e-07	3.17057e-06
TBC1D10C	199.457	-1.05969	0.216778	1.8956e-07	3.20059e-06
PAQR4	248.921	-0.855335	0.172497	1.91633e-07	3.23241e-06
ACAA2	1091.78	-0.868499	0.175542	1.97264e-07	3.32415e-06
TMEM38B	1257.88	0.936874	0.190157	1.9784e-07	3.33059e-06
HEXA	2457.08	-0.807928	0.162611	1.99437e-07	3.3542e-06
NINJ1	2158.1	1.01126	0.206808	2.04945e-07	3.44348e-06
PEBP1	1240.11	-0.990537	0.202629	2.08559e-07	3.50064e-06
EDEM1	5982.61	0.630047	0.125167	2.08754e-07	3.50064e-06
ENSG00000270210	24.9062	4.01304	0.864071	2.10009e-07	3.51827e-06
ACLY	5205.64	0.573482	0.113304	2.10389e-07	3.52121e-06
HDAC9	745.197	-1.38553	0.290591	2.17398e-07	3.63498e-06
UPP1	1538.83	0.806333	0.162747	2.2283e-07	3.72218e-06
FAIM	356.173	-1.34169	0.280978	2.23515e-07	3.72798e-06
NLRX1	244.516	-0.897585	0.182729	2.23609e-07	3.72798e-06
PRKX	2098.1	-1.09421	0.226396	2.24875e-07	3.74546e-06
MYO9B	13383.1	-0.715439	0.143308	2.25845e-07	3.75798e-06
IQSEC2	418.911	-0.769504	0.155195	2.30235e-07	3.82732e-06
FASN	4795.05	1.1849	0.246522	2.42409e-07	4.02581e-06
PCM1	4847.24	-0.547125	0.108577	2.44629e-07	4.05877e-06
STAC3	468.975	-0.847553	0.172515	2.46216e-07	4.08115e-06
RASSF3	3521.01	-0.524563	0.103888	2.46452e-07	4.08115e-06
SEPTIN9	5648.11	-0.812894	0.16513	2.49207e-07	4.12281e-06
FLOT2	2212.67	0.880006	0.179612	2.51863e-07	4.16274e-06
ITGB5	900.871	-1.14005	0.237356	2.52757e-07	4.17352e-06
ENSG00000279320	45.9002	2.37998	0.514984	2.53433e-07	4.18067e-06
RFX8	21.2471	4.50062	0.968495	2.58946e-07	4.26753e-06
MAPRE2	1824.78	-0.575129	0.114671	2.61722e-07	4.30916e-06
KCNJ15	220.524	3.58939	0.791316	2.7036e-07	4.44712e-06
ZNF532	464.106	-0.782638	0.159089	2.72829e-07	4.48346e-06
ERN1	1863.05	1.09696	0.22824	2.73743e-07	4.49418e-06
GPRC5B	14.7905	-6.06565	1.49258	2.80156e-07	4.5951e-06
DOK2	1082.57	-1.03036	0.214074	2.8408e-07	4.65502e-06
GPR157	611.351	1.32553	0.280009	2.85181e-07	4.66862e-06
DNER	19.1101	4.27494	0.933106	2.90253e-07	4.74714e-06
HPCAL1	956.22	-1.24668	0.262825	2.92264e-07	4.7755e-06
TBC1D1	4598.71	-0.927362	0.191322	2.93919e-07	4.79799e-06
KSR1	620.451	0.995336	0.206232	2.94377e-07	4.80091e-06
LIMK1	3546.28	-0.576155	0.115518	2.99213e-07	4.87517e-06
ZBED3-AS1	62.2354	-2.03188	0.441281	3.0446e-07	4.95597e-06
ENSG00000278869	21.9506	3.0217	0.65791	3.05546e-07	4.96894e-06
ADCY3	631.354	-1.01397	0.210973	3.06995e-07	4.98779e-06
ENSG00000279369	52.7336	-1.35634	0.287725	3.14387e-07	5.10308e-06
BMT2	722.521	0.884276	0.182244	3.16501e-07	5.13256e-06
TMC8	895.278	-0.812252	0.166597	3.19845e-07	5.18191e-06
APOBEC3C	1457.87	-0.620659	0.125248	3.24e-07	5.2443e-06
FGR	7695.74	-0.599993	0.12108	3.30699e-07	5.34769e-06
SIGLEC5	435.634	1.65762	0.357612	3.32369e-07	5.36967e-06
B3GNT8	127.445	-1.16473	0.245686	3.32698e-07	5.36994e-06
GALNT6	1339.08	0.950413	0.19744	3.37543e-07	5.44304e-06
ADCK1	207.181	-0.839515	0.172892	3.38312e-07	5.45033e-06
CD72	268.412	-1.08704	0.22831	3.38962e-07	5.4557e-06
MXI1	551.392	-1.18633	0.250848	3.40998e-07	5.48334e-06
ACVRL1	669.298	1.163	0.245368	3.45836e-07	5.55595e-06
LPL	19780.5	-1.78545	0.391518	3.5645e-07	5.72114e-06
ATF3	2283.72	-1.74721	0.3801	3.62579e-07	5.8141e-06
CTSS	73224.2	-0.910167	0.188567	3.66274e-07	5.86788e-06
PAK1	2684.81	-0.757584	0.155677	3.73504e-07	5.97814e-06
NAMPTP1	167.557	5.0568	1.14537	3.77448e-07	6.03566e-06
EHF	111.438	1.83074	0.400881	3.93711e-07	6.28988e-06
NSFL1C	1859.99	0.562775	0.113834	3.94824e-07	6.30181e-06
ARAP2	1753.89	0.782284	0.161361	3.97416e-07	6.33549e-06
FLVCR1	524.278	0.690925	0.141403	3.97669e-07	6.33549e-06
AGRN	945.939	1.17691	0.250158	4.07741e-07	6.48994e-06
SHB	70.7721	-1.68614	0.367512	4.08166e-07	6.4907e-06
GBP1	2432.05	1.75899	0.384172	4.22784e-07	6.71696e-06
RUBCNL	1183.34	1.46862	0.319362	4.27156e-07	6.77867e-06
PRIMPOL	221.587	-0.653207	0.133636	4.27455e-07	6.77867e-06
FLJ40194	14.2033	-3.36985	0.736556	4.36038e-07	6.90841e-06
PI4KA	4102.71	-0.460114	0.0927222	4.37028e-07	6.91774e-06
THBS1	2625.43	2.89438	0.648831	4.41798e-07	6.98681e-06
ENSG00000272341	63.7745	1.30001	0.279274	4.44175e-07	7.01797e-06
OLFML2B	2196.06	1.57771	0.343833	4.44622e-07	7.01858e-06
AMPH	8.01086	7.21489	2.69027	4.47181e-07	7.05251e-06
HSPA13	1810.87	1.09272	0.232328	4.55481e-07	7.17685e-06
JMJD1C	3724.21	-0.666649	0.137018	4.60877e-07	7.25523e-06
TMEM45B	31.1882	3.35308	0.75621	4.65189e-07	7.31643e-06
KLF10	800.965	-0.936945	0.197415	4.70665e-07	7.39131e-06
ENSG00000271009	83.8932	-1.68579	0.370252	4.70808e-07	7.39131e-06
NDFIP2	57.885	1.34423	0.290525	4.71344e-07	7.39298e-06
TAB1	553.888	-0.63191	0.130186	4.76644e-07	7.4693e-06
MAP3K8	874.93	0.957674	0.202038	4.7813e-07	7.48578e-06
ZFHX3	1741.03	-0.865822	0.181564	4.87901e-07	7.63182e-06
JAML	4029.9	-1.07748	0.22954	4.89901e-07	7.65196e-06
CHCHD6	38.1762	-1.63547	0.357935	4.90077e-07	7.65196e-06
TGFBI	17798.1	1.33662	0.287237	5.04807e-07	7.8748e-06
MARCHF3	78.0164	1.49755	0.326725	5.06042e-07	7.88693e-06
ARNT2	269.97	4.87165	1.12024	5.08796e-07	7.92268e-06
RPS6KA4	673.026	-0.969203	0.205372	5.10623e-07	7.94394e-06
ARHGEF6	2668.53	-0.638106	0.13149	5.22527e-07	8.12181e-06
ENSG00000254054	22.4476	-2.30129	0.512145	5.29392e-07	8.2211e-06
IGF2BP1	9.76155	4.35868	0.912295	5.368e-07	8.32863e-06
ZNF711	30.6919	-1.47233	0.321634	5.60505e-07	8.68858e-06
LAP3	5654.81	1.20635	0.262247	5.6366e-07	8.72964e-06
STX11	1464.86	0.77499	0.162144	5.67375e-07	8.77928e-06
TES	1261.76	0.720142	0.150101	5.84939e-07	9.03749e-06
DOC2A	29.4353	-2.29542	0.515341	5.85112e-07	9.03749e-06
SLAMF7	17783.8	1.26999	0.276878	5.97248e-07	9.21667e-06
ALDH1L2	295.706	1.3153	0.287048	5.98033e-07	9.22053e-06
SPHK1	751.394	1.11373	0.239961	6.04553e-07	9.31271e-06
DST	749.742	-1.18056	0.256098	6.10692e-07	9.39887e-06
SRSF12	17.9499	2.25327	0.502758	6.20764e-07	9.54536e-06
DNAJB9	1066.57	1.06802	0.229867	6.25358e-07	9.60741e-06
AFF2	37.9757	1.6892	0.375139	6.26455e-07	9.61514e-06
UBAP1	1683.6	0.771423	0.162025	6.26977e-07	9.61514e-06
SLC16A3	3780.01	0.713208	0.149077	6.35835e-07	9.74231e-06
BRCA2	699.196	1.28763	0.281497	6.42911e-07	9.84197e-06
ARHGAP22	656.127	-1.12894	0.244751	6.52697e-07	9.9829e-06
TPPP3	14.5536	-3.22516	0.721577	6.57474e-07	1.0047e-05
NUPR1	13.3448	-5.88724	1.50536	6.59797e-07	1.00736e-05
CSPG4BP	11.3776	4.55124	0.976401	6.61242e-07	1.00867e-05
TLE3	1903.44	-0.972891	0.208745	6.70798e-07	1.02178e-05
ANXA7	3192.06	0.683702	0.142971	6.71023e-07	1.02178e-05
CENPV	91.2703	-1.62084	0.36156	6.89173e-07	1.04849e-05
GYPC	634.633	1.30849	0.287382	6.93393e-07	1.05398e-05
RN7SL124P	15.144	5.45481	1.18248	6.97444e-07	1.0592e-05
CAMK2D	1126.46	-0.714751	0.15014	6.98837e-07	1.06039e-05
GPR34	333.264	-4.23381	0.989818	7.05327e-07	1.06929e-05
COMMD6	585.595	-0.552606	0.114492	7.19581e-07	1.08994e-05
ENSG00000253838	67.1928	4.93587	1.15305	7.33675e-07	1.11031e-05
FNDC10	60.8432	-1.50852	0.336028	7.65151e-07	1.15693e-05
IDI1	3313.85	0.762705	0.161577	7.82561e-07	1.18222e-05
NBPF1	327.602	-0.699788	0.1475	7.85378e-07	1.18543e-05
ASAH1	18491.7	-0.955186	0.205883	8.08149e-07	1.21873e-05
PTPRN2-AS1	359.903	-0.935337	0.201755	8.13685e-07	1.22462e-05
FHL1	196.087	-2.41908	0.557268	8.14346e-07	1.22462e-05
MIRLET7IHG	205.851	1.32689	0.294061	8.14487e-07	1.22462e-05
JARID2	2329.54	-0.862738	0.18515	8.14896e-07	1.22462e-05
BCL9	186.72	1.02966	0.22357	8.25189e-07	1.23901e-05
STAT3	6665.13	0.915536	0.197154	8.30469e-07	1.24585e-05
TNFRSF10A	635.561	1.0061	0.218327	8.36627e-07	1.25338e-05
RCN1	333.725	1.08012	0.235766	8.36944e-07	1.25338e-05
SNX1	4417.1	-0.500693	0.10396	8.39038e-07	1.25542e-05
TVP23B	434.452	0.745088	0.158143	8.46765e-07	1.26588e-05
BNC2	32.1581	-3.42639	0.795447	8.4761e-07	1.26605e-05
IQCE	421.599	-0.650609	0.13702	8.54987e-07	1.27596e-05
GM2A	18210.7	-0.747308	0.158709	8.70252e-07	1.29762e-05
PLD1	2814.53	1.61079	0.362137	8.74598e-07	1.30297e-05
PARP9	1991.53	1.07104	0.234238	8.85402e-07	1.31793e-05
LY86-AS1	13.3963	-3.46134	0.78198	8.91193e-07	1.3254e-05
TK2	591.76	-0.576885	0.121	9.17804e-07	1.3638e-05
CIBAR1	26.1888	-1.73843	0.392597	9.19732e-07	1.36548e-05
SERINC2	100.157	-1.38736	0.310957	9.64499e-07	1.43071e-05
KCNJ1	126.217	-2.04963	0.471912	9.6552e-07	1.431e-05
PIK3R1	2825.93	-0.718464	0.153198	9.66546e-07	1.43129e-05
MIR503HG	38.6042	-1.47626	0.331769	9.77023e-07	1.44556e-05
OTUD1	1111.83	1.48682	0.336231	1.0335e-06	1.52781e-05
CLPB	1376.59	0.835343	0.180468	1.04273e-06	1.54013e-05
ATP10A	408.355	-1.27967	0.286697	1.0592e-06	1.56311e-05
FMN1	583.993	1.2436	0.277744	1.06644e-06	1.57245e-05
GPR68	86.0265	2.17908	0.505807	1.08108e-06	1.59268e-05
FBXO38	2080.87	-0.574541	0.121366	1.08493e-06	1.59698e-05
HNMT	3519.99	0.698403	0.149319	1.08685e-06	1.59844e-05
CAMKK1	638.141	-1.26964	0.285009	1.11598e-06	1.63988e-05
NRN1	16.9305	2.35149	0.541648	1.12131e-06	1.6463e-05
SIAH2	691.276	0.692362	0.148043	1.12909e-06	1.65632e-05
ZCCHC2	2626.32	-0.719756	0.154486	1.13207e-06	1.65927e-05
TXNIP	12050.6	-0.925096	0.202153	1.13542e-06	1.66278e-05
PKD2L1	58.4175	-1.70964	0.392311	1.13838e-06	1.6657e-05
CDK14	1741.4	0.645462	0.137538	1.1524e-06	1.68477e-05
TBC1D10B	1250.26	0.549063	0.116371	1.23368e-06	1.80208e-05
CD36	17458	-1.47889	0.337607	1.23811e-06	1.80701e-05
CRISPLD2	360.73	2.1687	0.507563	1.3029e-06	1.89996e-05
OAS1	2300.9	-1.16522	0.261924	1.32214e-06	1.92638e-05
TRIM6	52.4509	1.57696	0.361459	1.32747e-06	1.93252e-05
SRI	1121.5	0.852761	0.186596	1.33942e-06	1.94827e-05
NFIX	101.027	-0.991331	0.219691	1.34248e-06	1.95107e-05
IFNLR1	279.659	-1.13766	0.255489	1.36987e-06	1.9892e-05
APIP	726.441	0.818975	0.179087	1.41679e-06	2.05559e-05
ENSG00000251034	19.8562	-3.12759	0.73804	1.43808e-06	2.08473e-05
SSH1	4020.45	0.548156	0.116855	1.44189e-06	2.0885e-05
ATP6AP2	10038.1	-0.822343	0.180297	1.46615e-06	2.12186e-05
GTDC1	759.828	0.768453	0.167642	1.48567e-06	2.14695e-05
KDM6B	1483.18	0.580662	0.124309	1.48694e-06	2.14695e-05
CALM3	5952.89	-0.479991	0.101919	1.48723e-06	2.14695e-05
PHC2	1821.68	0.781952	0.170814	1.48874e-06	2.14733e-05
TNFRSF18	46.2581	2.46518	0.585156	1.49988e-06	2.16158e-05
GDF15	152.475	-2.19736	0.520627	1.53853e-06	2.21544e-05
KATNAL2	24.4601	-1.65964	0.383494	1.55304e-06	2.23445e-05
FSCN1	641.309	1.25435	0.28572	1.5751e-06	2.26431e-05
MEGF9	4939.82	0.838034	0.184536	1.57765e-06	2.26608e-05
FAM131B	106.429	-1.86964	0.439311	1.58527e-06	2.27512e-05
KCNC4	195.603	-1.16714	0.26476	1.59921e-06	2.29322e-05
DIP2C	26.9902	-2.29534	0.543101	1.62433e-06	2.3273e-05
CREM	381.93	0.783046	0.171935	1.65333e-06	2.36689e-05
PALS1	444.717	0.695237	0.151387	1.67776e-06	2.39987e-05
DTWD2	217.153	-0.929434	0.20734	1.71069e-06	2.44452e-05
CC2D2A	5.40243	-6.41366	2.59689	1.71182e-06	2.44452e-05
HCST	788.009	-1.33044	0.306337	1.71628e-06	2.44737e-05
ELK1	749.376	0.621921	0.134577	1.71665e-06	2.44737e-05
CHI3L2	133.297	1.11723	0.253166	1.74752e-06	2.48931e-05
NID2	48.9056	1.98174	0.468708	1.75043e-06	2.4914e-05
MAP3K5-AS2	445.297	-1.79552	0.423482	1.75772e-06	2.49971e-05
DNAJB5	667.921	0.884711	0.196721	1.7605e-06	2.50159e-05
HPGDS	13.0168	-4.16683	0.962903	1.77044e-06	2.51125e-05
SH3D21	349.685	-0.925989	0.206916	1.77088e-06	2.51125e-05
CTSD	19319.2	-0.813436	0.179958	1.77167e-06	2.51125e-05
MAP3K5	2147.28	-0.629743	0.136307	1.77944e-06	2.52018e-05
ITGB8-AS1	20.2794	3.23051	0.779548	1.78693e-06	2.52758e-05
NOD2	1364.51	0.989932	0.22225	1.78759e-06	2.52758e-05
BASP1	2990.4	1.06713	0.241288	1.7907e-06	2.5299e-05
MEF2A	2418.87	-0.603344	0.130702	1.79691e-06	2.53659e-05
HAGHL	52.4234	-1.44416	0.334788	1.80489e-06	2.54577e-05
UBA6	2425.74	0.601995	0.130315	1.80934e-06	2.54995e-05
HGSNAT	2469.99	-0.386758	0.0821797	1.81394e-06	2.55435e-05
APPL2	745.955	-0.770188	0.169763	1.82006e-06	2.56087e-05
HSPA6	243.919	1.43631	0.333267	1.82515e-06	2.56593e-05
ADORA2A	15.4367	3.09358	0.741322	1.83278e-06	2.57457e-05
CDYL2	923.815	0.823895	0.182674	1.87089e-06	2.62595e-05
LINC01010	1231.41	-1.6895	0.398308	1.87983e-06	2.63636e-05
RNF141	813.51	-0.785805	0.173857	1.90206e-06	2.66536e-05
FAM200B	311.482	0.568008	0.122837	1.90984e-06	2.67409e-05
ITGA1	50.7571	2.43194	0.58305	1.91174e-06	2.67457e-05
FAM168A	2280.9	0.741158	0.163252	1.94614e-06	2.72049e-05
SLAMF1	153.557	1.38347	0.320984	1.95382e-06	2.72902e-05
AFDN	424.398	1.46325	0.341226	1.95692e-06	2.73112e-05
IDE	2288.87	0.616573	0.134217	1.9636e-06	2.73823e-05
TMEM115	674.101	0.666071	0.145701	1.97635e-06	2.75378e-05
TNFRSF10D	526.393	0.749839	0.165537	2.0096e-06	2.79784e-05
RASGEF1B	1481.28	-1.12494	0.257471	2.032e-06	2.82675e-05
LILRA3	6.38821	6.78536	2.65849	2.0401e-06	2.83573e-05
DEXI	261.24	-0.669426	0.146892	2.07007e-06	2.87507e-05
PLEKHN1	37.5784	1.96607	0.468052	2.08979e-06	2.90012e-05
AHCTF1	1554.68	0.716944	0.158159	2.11659e-06	2.93493e-05
HAPLN3	58.4542	3.37054	0.824481	2.13459e-06	2.95752e-05
KL	65.0558	3.12595	0.763872	2.13978e-06	2.96233e-05
MVK	628.785	0.742052	0.164202	2.1464e-06	2.9691e-05
TRERF1	1621	-0.961059	0.217806	2.149e-06	2.97031e-05
RNASE6	1209.21	-1.36889	0.319771	2.1595e-06	2.98243e-05
AZI2	1739.97	0.817414	0.182464	2.19682e-06	3.03155e-05
GAPDH	19508.4	0.601491	0.131379	2.2105e-06	3.04797e-05
DIRAS1	47.7788	-1.81657	0.433471	2.25239e-06	3.10326e-05
ARFGAP3	2652.99	0.787646	0.175729	2.30056e-06	3.16709e-05
GMPR	99.0785	-1.98174	0.477655	2.34145e-06	3.2208e-05
CCNB2	38.1139	-1.4957	0.352491	2.41219e-06	3.31546e-05
PLEKHA2	3866.36	-0.684171	0.151513	2.43553e-06	3.34488e-05
LINC01503	153.128	-1.16209	0.269263	2.45296e-06	3.36613e-05
POM121	1037.54	0.454769	0.0984571	2.47524e-06	3.394e-05
MAPK1	6310.97	0.438431	0.0947344	2.48009e-06	3.39793e-05
TNFRSF10B	2525.39	0.585788	0.128398	2.4856e-06	3.40039e-05
AFTPH-DT	104.256	-1.04583	0.240043	2.48582e-06	3.40039e-05
OASL	81.1676	1.78941	0.429448	2.49525e-06	3.41057e-05
ODF3B	487.36	1.55285	0.369212	2.56174e-06	3.49631e-05
ZFTA	88.7676	0.990045	0.226383	2.56204e-06	3.49631e-05
HMGCS1	4938.66	0.838259	0.190213	2.57952e-06	3.51738e-05
KIF22	353.005	-0.692277	0.153986	2.62606e-06	3.57801e-05
C1orf115	58.6649	2.03651	0.494139	2.63524e-06	3.58768e-05
LINC01160	45.0341	-1.26016	0.294578	2.64948e-06	3.60422e-05
CYP27A1	12029.1	-0.978487	0.22437	2.65346e-06	3.60678e-05
CDC42EP3	876.485	-1.5359	0.367275	2.65631e-06	3.6078e-05
FAM219A	585.31	0.782763	0.175753	2.66602e-06	3.61814e-05
PANK3	5979.12	0.629939	0.138802	2.67124e-06	3.62237e-05
SLC46A3	936.232	-0.896762	0.204055	2.70031e-06	3.65694e-05
ADAMTS15	14.0151	-5.19378	1.182	2.70098e-06	3.65694e-05
ENSG00000287037	6.7731	5.04726	1.38619	2.73531e-06	3.7005e-05
BMP10	6.27139	6.73906	2.66357	2.74898e-06	3.71609e-05
SLCO3A1	1420.27	0.66177	0.146976	2.75494e-06	3.72123e-05
L3MBTL2-AS1	19.1529	1.92535	0.462432	2.76987e-06	3.73846e-05
TSPOAP1-AS1	151.689	0.79498	0.179263	2.81356e-06	3.79445e-05
NRDC	6498.56	0.473338	0.103353	2.89058e-06	3.89527e-05
PIK3IP1	441.866	-1.91267	0.466399	2.9334e-06	3.94989e-05
GTF2IRD1	129.247	-1.07779	0.250418	2.97126e-06	3.99774e-05
CCDC107	269.171	-0.723473	0.162518	3.00644e-06	4.04191e-05
TGFBR1	4657.48	-0.967225	0.222874	3.00915e-06	4.04239e-05
LINC01504	217.829	-1.13728	0.266138	3.07229e-06	4.12157e-05
SDC4	1225.77	0.907858	0.207912	3.07287e-06	4.12157e-05
FICD	338.091	0.86445	0.197261	3.08467e-06	4.13417e-05
ABCG1	1771.21	1.68685	0.407206	3.08973e-06	4.13773e-05
ATP13A3	19490.5	1.2921	0.305522	3.1143e-06	4.1674e-05
ARL6IP5	7144.16	0.3925	0.0857827	3.11936e-06	4.17025e-05
ARF5	814.017	-0.445595	0.0974748	3.12127e-06	4.17025e-05
NOL3	132.09	1.48286	0.355505	3.1705e-06	4.23274e-05
MERTK	2956.07	1.17413	0.275892	3.21702e-06	4.29151e-05
SEC23B	3230	0.567121	0.125373	3.24755e-06	4.3289e-05
PAX8	129.514	-1.01359	0.235451	3.27245e-06	4.35871e-05
PNPLA8	2052.2	0.753832	0.170415	3.28051e-06	4.36607e-05
TTC3	5436.11	-0.539262	0.119267	3.2946e-06	4.38143e-05
BTN2A1	1636.84	0.760218	0.17277	3.38776e-06	4.50186e-05
ENSG00000241886	180.305	1.90086	0.466699	3.4506e-06	4.58182e-05
ZBTB7B	2043.6	0.557756	0.123902	3.489e-06	4.62925e-05
IRF5	2518.9	-0.783373	0.178476	3.51072e-06	4.65283e-05
DNM2	5203.23	0.432546	0.0953534	3.51218e-06	4.65283e-05
ENSG00000274508	32.6151	2.79311	0.697587	3.57225e-06	4.72876e-05
C1orf162	1231.91	-1.05946	0.248434	3.59361e-06	4.75339e-05
SDS	1063.23	-1.42862	0.344483	3.60916e-06	4.7703e-05
HLX	201.624	1.0365	0.242367	3.61901e-06	4.77964e-05
FUT8	421.29	0.784216	0.178893	3.64308e-06	4.80776e-05
CHUK	1605.89	0.534863	0.118931	3.64755e-06	4.80997e-05
LINC02528	30.7805	2.76473	0.693148	3.66343e-06	4.8272e-05
DDX59	653.179	0.891681	0.205682	3.66862e-06	4.83036e-05
ENSG00000233785	12.5355	3.65875	0.901471	3.73122e-06	4.90902e-05
ADGRG6	25.6733	-2.29168	0.569385	3.75803e-06	4.94052e-05
PWWP2B	146.522	-0.844359	0.194262	3.78879e-06	4.97341e-05
KNSTRN	345.866	-0.659371	0.148717	3.78883e-06	4.97341e-05
CADM1	890.469	-0.975782	0.227871	3.82794e-06	5.02092e-05
JRKL	587.715	0.538095	0.119858	3.84307e-06	5.03694e-05
PRKCD	5139.05	0.552274	0.123199	3.85474e-06	5.04839e-05
USP32	2540.61	0.609141	0.136708	3.88173e-06	5.07987e-05
APBA1	9.32198	-4.08883	0.953372	3.89798e-06	5.09674e-05
NOTCH2	19012.6	-0.672301	0.152196	3.90053e-06	5.09674e-05
GUCY1A1	152.629	-1.97051	0.48947	3.92276e-06	5.12189e-05
FECH	819.862	-0.927413	0.215665	3.93389e-06	5.13254e-05
SLC9A8	1240.73	0.730399	0.166184	3.95807e-06	5.16017e-05
ARHGAP10	1448.68	-0.862332	0.199392	3.96438e-06	5.16449e-05
ADAMDEC1	9010.83	1.48083	0.356092	3.97233e-06	5.17093e-05
RBM43	299.756	-0.766083	0.175322	3.97847e-06	5.17501e-05
PDGFC	617.446	-1.63	0.3997	3.99572e-06	5.19353e-05
RNF170	591.003	-0.469844	0.104247	4.0398e-06	5.24686e-05
SLC4A7	2951.08	1.02597	0.2411	4.17772e-06	5.42191e-05
EPB41L2	1853.86	-0.867999	0.201868	4.18618e-06	5.4288e-05
DNAJB6	4416.15	0.607785	0.136129	4.19424e-06	5.43515e-05
EXTL2	106.328	-1.20036	0.287103	4.24014e-06	5.49051e-05
PELO	322.198	0.956719	0.223831	4.25602e-06	5.50693e-05
BRMS1L	176.621	0.846957	0.19622	4.38937e-06	5.6752e-05
CNIH4	857.082	0.975215	0.228813	4.46313e-06	5.76625e-05
PGD	15716.9	0.615032	0.139071	4.48582e-06	5.79121e-05
ZNF589	1357.04	-1.18087	0.283378	4.53383e-06	5.84882e-05
MORC3	2772.69	0.475296	0.10588	4.56245e-06	5.88132e-05
IL36G	10.5165	3.7164	0.907328	4.5866e-06	5.90804e-05
PSME2P2	36.1598	1.41014	0.342437	4.60782e-06	5.93094e-05
ARID5B	2898.84	1.38998	0.337887	4.64492e-06	5.97278e-05
CAVIN3	91.3488	1.22478	0.294527	4.64727e-06	5.97278e-05
TSHZ3	535.827	0.907351	0.212581	4.75767e-06	6.11011e-05
PLAU	929.664	1.00086	0.23659	4.76264e-06	6.11194e-05
TASL	683.747	-0.771771	0.178437	4.79498e-06	6.14886e-05
PRELID1	1734.01	0.742759	0.171045	4.81778e-06	6.17349e-05
SMAD7	591.048	0.703617	0.161418	4.82277e-06	6.17529e-05
RARRES1	122.717	-2.54505	0.651754	4.86396e-06	6.22341e-05
RAB5A	2283.48	0.612834	0.139198	4.88365e-06	6.24397e-05
RIMS3	170.873	1.22049	0.294556	4.91321e-06	6.27709e-05
RHOB	248.426	-0.983867	0.233315	5.09184e-06	6.50049e-05
FBXO6	166.917	1.27146	0.308879	5.13704e-06	6.55192e-05
SLC43A1	108.845	-0.866912	0.203023	5.13973e-06	6.55192e-05
ST14	642.689	-1.49036	0.367997	5.16318e-06	6.57695e-05
OTOA	10.8961	-5.49008	1.56473	5.21788e-06	6.6417e-05
ZNF281	1798.63	0.531757	0.120066	5.24085e-06	6.66177e-05
GPR146	15.7176	-1.9586	0.487481	5.24198e-06	6.66177e-05
ZC3H12A-DT	119.707	1.24727	0.302977	5.24525e-06	6.66177e-05
ADGRD1	112.728	-1.55413	0.385477	5.27548e-06	6.69523e-05
LYZ	201957	-0.851187	0.199732	5.35586e-06	6.79223e-05
STXBP5	1610.75	0.883997	0.208069	5.4625e-06	6.92238e-05
ACVR1B	2476.43	0.973721	0.231344	5.48571e-06	6.94668e-05
ENSG00000268729	106.625	1.06187	0.254332	5.51509e-06	6.97875e-05
ANGPT1	10.7916	-4.82495	1.12763	5.53373e-06	6.99721e-05
CENPU	136.223	-1.41092	0.348104	5.54239e-06	7.00301e-05
SLC2A8	157.995	-0.782385	0.182393	5.56168e-06	7.02223e-05
GIPC3	176.414	-1.1695	0.283602	5.64272e-06	7.11934e-05
ENSG00000228923	7.78324	5.16504	1.4817	5.68599e-06	7.16868e-05
CRYBG1	6282.64	0.533075	0.121014	5.7694e-06	7.26851e-05
UST	121.446	-1.64502	0.413215	5.95263e-06	7.49387e-05
NFIA	136.994	-1.54186	0.38539	6.04392e-06	7.60325e-05
GNE	1012.61	0.706019	0.163843	6.05977e-06	7.61762e-05
OSBPL5	302.543	-1.09461	0.26513	6.1507e-06	7.72629e-05
HMG20B	1706.8	-0.715434	0.166446	6.17487e-06	7.75099e-05
ATP2B4	1975.4	-0.896328	0.213057	6.25525e-06	7.84617e-05
ENSG00000258976	10.7536	3.18395	0.811868	6.33913e-06	7.9456e-05
EPHB2	648.598	-1.3225	0.327137	6.36796e-06	7.97592e-05
NIPSNAP3A	479.807	-0.542237	0.123918	6.37767e-06	7.98229e-05
PACS2	879.062	-0.701536	0.163275	6.43922e-06	8.05346e-05
ITGAL	8035.24	-0.724331	0.169296	6.46696e-06	8.08229e-05
SMURF2	975.907	0.544234	0.12443	6.47769e-06	8.08984e-05
ENSG00000262580	857.699	-1.27431	0.314665	6.54606e-06	8.16929e-05
HEXIM1	1188.2	0.502197	0.11459	6.59521e-06	8.22468e-05
ZNF691-DT	44.6403	1.41419	0.351642	6.61563e-06	8.24416e-05
SMCO2	8.73866	3.70857	0.917813	6.62112e-06	8.24504e-05
FMNL1	6671.79	0.677372	0.157441	6.69971e-06	8.33688e-05
MAD2L2	290.152	0.768033	0.180411	6.71193e-06	8.34606e-05
ZNF316	965.11	-0.6668	0.155185	6.88765e-06	8.55838e-05
CABP4	123.381	-1.23891	0.305836	6.92416e-06	8.59327e-05
XCR1	32.3512	-2.25623	0.583717	6.92571e-06	8.59327e-05
PLPPR2	545.867	0.638976	0.148273	6.96145e-06	8.6314e-05
RNPEPL1	1395.25	-0.525968	0.120491	6.97403e-06	8.64078e-05
TMEM266	10.1735	-2.80792	0.709886	7.03457e-06	8.70951e-05
PHACTR1	432.113	-1.08416	0.26443	7.05926e-06	8.72765e-05
IPO13	635.725	-0.468212	0.106702	7.05935e-06	8.72765e-05
WASF2	8865.44	-0.366998	0.0829912	7.07497e-06	8.74069e-05
ENSG00000255446	23.9782	-2.35594	0.608812	7.09194e-06	8.75537e-05
NR1D1	33.2997	-1.42747	0.356137	7.12951e-06	8.79545e-05
GBGT1	611.269	0.60306	0.139457	7.13548e-06	8.7965e-05
WAS	2739.81	0.53505	0.122861	7.15899e-06	8.81918e-05
MEGF6	120.75	-1.7067	0.43502	7.17326e-06	8.83044e-05
RHOBTB1	219.812	-0.965566	0.233048	7.25612e-06	8.92606e-05
ANP32A	3877.36	-0.545717	0.125632	7.33261e-06	9.01372e-05
CEP41	219.45	-0.741018	0.174637	7.41307e-06	9.10362e-05
RNF145	3982.08	1.03716	0.252093	7.41632e-06	9.10362e-05
SIGLEC15	81.6122	-1.00866	0.24476	7.42779e-06	9.10443e-05
LINC00865	26.1728	-2.26627	0.587281	7.43239e-06	9.10443e-05
BATF	125.456	1.21306	0.299713	7.43283e-06	9.10443e-05
QPCTL	150.225	0.774313	0.18297	7.44279e-06	9.11015e-05
HRH1	227.501	1.35325	0.338249	7.48e-06	9.14917e-05
DCUN1D3	428.913	0.81195	0.192937	7.4853e-06	9.14917e-05
PCDH12	9.1195	3.2375	0.816378	7.60402e-06	9.28769e-05
NENF	293.296	-0.960821	0.232486	7.62369e-06	9.30512e-05
ADAM15	1099.62	-0.819496	0.195424	7.77358e-06	9.48134e-05
IRF6	18.7253	2.73475	0.715968	7.80108e-06	9.50816e-05
PGBD5	97.0352	-2.37239	0.624297	8.07181e-06	9.83117e-05
PTGER2	1291.11	0.965591	0.234262	8.08382e-06	9.83884e-05
NPTN	3812.23	0.577859	0.134243	8.1652e-06	9.93086e-05
B4GALT5	7610.15	1.24438	0.309048	8.17497e-06	9.93573e-05
BAZ1A	4370.8	0.574596	0.133375	8.18346e-06	9.93904e-05
HSD17B7	588.447	0.704224	0.166008	8.21122e-06	9.96573e-05
EXOC8	1157.73	0.48497	0.111528	8.22564e-06	9.9762e-05
DGAT2	173.038	1.11745	0.275657	8.30985e-06	0.000100712
SLC25A44	1232.17	0.375942	0.0856014	8.32897e-06	0.000100873
ENG	5757.79	0.640218	0.149914	8.37388e-06	0.000101346
KLF9	872.366	0.978893	0.238328	8.42671e-06	0.000101913
ARID3A	1427.31	0.569758	0.13234	8.48731e-06	0.000102574
STRN3	767.654	0.772046	0.183803	8.503e-06	0.000102692
CAMKK2	1470.09	-0.722077	0.171108	8.54266e-06	0.000103099
IL6	90.105	4.66488	1.27174	8.62789e-06	0.000104054
CCDC88C	840.778	-0.59951	0.140133	8.73242e-06	0.000105241
ERMP1	1018.24	-0.646813	0.15208	8.74301e-06	0.000105295
KIF24	70.0992	-1.13053	0.280275	8.83987e-06	0.000106387
SH3BGRL3	9377.44	-0.822389	0.197795	8.87138e-06	0.000106692
FTH1P10	52.3273	1.35103	0.341178	8.88317e-06	0.000106759
PLEKHG2	841.289	1.14744	0.285137	9.00527e-06	0.000108151
RFX2	351.046	0.668476	0.157773	9.09903e-06	0.000109201
CEACAM19	68.3439	1.36873	0.346195	9.11618e-06	0.000109331
HSD11B1-AS1	10.8572	2.88206	0.748508	9.15382e-06	0.000109706
OSBPL7	98.3538	-1.14775	0.285793	9.19305e-06	0.000110099
NCK2	387.97	0.868534	0.209971	9.19944e-06	0.000110099
GAS7	9458.2	-0.714093	0.16993	9.25786e-06	0.000110721
HAS1	5.45269	6.44231	2.66379	9.3478e-06	0.000111719
GSAP	3896.89	0.773326	0.185122	9.38074e-06	0.000112035
S100A10	4620.76	0.678399	0.160569	9.4169e-06	0.000112389
LINC02542	9.69662	-2.9271	0.751827	9.4618e-06	0.000112847
MAFG	1814.23	0.712572	0.169442	9.48583e-06	0.000113055
LNPK	1559.66	0.634333	0.149529	9.58634e-06	0.000114174
CGAS	460.915	0.856911	0.207416	9.63094e-06	0.000114559
ARMC7	287.109	-0.582962	0.136651	9.63197e-06	0.000114559
THBS4-AS1	25.7888	-1.92396	0.501035	9.6998e-06	0.000115286
PGM5	38.459	-2.11942	0.559082	9.8253e-06	0.000116697
GINS1	99.4945	-1.12073	0.279532	9.92088e-06	0.000117752
ENSG00000271254	168.276	-0.763082	0.18312	9.93459e-06	0.000117833
CABYR	20.2024	1.89801	0.495381	1.00616e-05	0.000119257
TCN2	442.632	-1.28536	0.326039	1.01071e-05	0.000119714
SUGCT-AS1	109.509	-1.36999	0.349664	1.01148e-05	0.000119723
ACADM	1285.48	-0.611377	0.145429	1.01889e-05	0.000120518
SERPINB1	3907.9	0.591698	0.139187	1.02895e-05	0.000121623
LMO4	1068.02	0.692506	0.165015	1.03063e-05	0.000121739
MDM2	3368.95	0.60437	0.142494	1.03256e-05	0.000121883
FSTL1	27.6898	2.20223	0.582215	1.04704e-05	0.000123508
MIDN	1560.9	0.604934	0.142837	1.04878e-05	0.000123628
GJD3	9.27893	3.24358	0.839027	1.05766e-05	0.000124589
ENSG00000240207	35.239	-1.33774	0.340219	1.05864e-05	0.00012462
ST6GALNAC3	129.264	0.905394	0.221746	1.08227e-05	0.000127314
SLC1A4	2802.64	-1.04954	0.261848	1.09587e-05	0.000128826
IL7	40.7766	1.49729	0.386388	1.10352e-05	0.000129638
KIAA0513	2800.6	-0.472223	0.110175	1.10814e-05	0.000130091
PIAS2	497.978	-0.635785	0.151268	1.11507e-05	0.000130816
SSPN	71.2941	1.04584	0.260405	1.12191e-05	0.000131529
ZNF462	46.8356	2.27496	0.610627	1.12849e-05	0.000132209
KLHL26	214.557	0.902076	0.22141	1.1309e-05	0.000132402
SREBF2	6270.1	0.564972	0.133232	1.13201e-05	0.000132442
PDGFRB	41.4941	1.13789	0.286089	1.13517e-05	0.000132721
ZMIZ2	3047.8	0.916121	0.225995	1.1371e-05	0.000132857
NRROS	1541.23	-0.696939	0.167266	1.142e-05	0.000133339
CHMP5	1360.11	0.627776	0.149406	1.1475e-05	0.000133891
FEM1B	3719.88	-0.587784	0.139371	1.17366e-05	0.000136851
ZBED2	59.7238	2.24711	0.602502	1.17721e-05	0.000137171
CLEC12A	1667.16	-1.82831	0.487693	1.18771e-05	0.000138302
LIMD2	637.741	-0.858533	0.210774	1.20364e-05	0.000140061
ENSG00000232680	5.62697	6.46996	2.69133	1.21025e-05	0.000140736
LINC02555	6.11301	4.82008	1.44382	1.21303e-05	0.000140964
FDX1	1499.01	-1.03508	0.259502	1.22224e-05	0.000141938
RASSF4	6689.32	0.903008	0.22129	1.23336e-05	0.000143133
SYNE1	1797.95	-0.840741	0.206677	1.24214e-05	0.000144054
CD55	2662.7	1.56099	0.404275	1.2446e-05	0.000144243
CARD14	125.562	-3.3802	0.938488	1.24836e-05	0.000144582
PNPLA7	68.843	-1.85627	0.493988	1.25463e-05	0.00014521
C19orf38	403.935	0.593395	0.141375	1.2819e-05	0.000148266
CCDC186	1350.77	0.645284	0.154663	1.2883e-05	0.000148907
EVI2B	5861.81	-0.638765	0.153338	1.30715e-05	0.000150984
RAP2C	2223.03	0.522753	0.123652	1.31053e-05	0.000151273
ASB1	1220.52	-0.725135	0.175973	1.31188e-05	0.000151328
GPR65	3027.85	0.70427	0.170417	1.323e-05	0.000152509
WASF1	94.3725	1.67224	0.441909	1.3313e-05	0.000153363
SEMA3G	23.9533	-2.32767	0.629442	1.37238e-05	0.000157989
CEACAM3	42.0986	2.92972	0.811085	1.37431e-05	0.000158106
AGK	236.939	1.11421	0.283339	1.38478e-05	0.000159203
CD44-AS1	18.0157	2.09657	0.559161	1.38676e-05	0.000159325
DIS3L	748.517	-0.604358	0.144945	1.39922e-05	0.000160649
FZD1	1056.52	-0.945534	0.236642	1.4021e-05	0.000160873
SNTB2	958.157	0.566634	0.13521	1.40311e-05	0.000160882
TESC	29.8892	-1.69319	0.448969	1.40935e-05	0.000161489
SCP2	2950.95	-0.429079	0.101014	1.41365e-05	0.000161839
ASPHD2	159.689	0.744584	0.181654	1.41429e-05	0.000161839
DDI2	2582.93	-0.650727	0.156881	1.41936e-05	0.000162312
TOM1	2111.52	0.765588	0.187661	1.45588e-05	0.000166377
SAMD8	1428.88	0.674172	0.163436	1.46101e-05	0.000166853
SERF2	5087.1	-0.397322	0.0934808	1.46675e-05	0.000167398
CHKA	634.349	-0.575356	0.137917	1.46916e-05	0.000167562
SELENOS	1059.39	0.698036	0.169739	1.47056e-05	0.000167566
CBX6	1916.71	0.577397	0.138317	1.47114e-05	0.000167566
MAN1C1	215.824	-0.783793	0.192853	1.47564e-05	0.000167968
ATP1B4	42.5908	-1.56191	0.412798	1.48019e-05	0.000168374
DGCR6L	149.706	-0.934008	0.234309	1.50896e-05	0.000171533
GALNT2	2340.87	0.592233	0.142376	1.51663e-05	0.000172292
CLN6	481.323	-1.14375	0.293834	1.51909e-05	0.000172457
CREBL2	5255.41	0.426233	0.100662	1.52525e-05	0.000173042
DCLRE1B	970.507	0.47825	0.113518	1.53063e-05	0.000173538
FBP1	13383	-1.49771	0.397155	1.54359e-05	0.000174775
NRP1	7197.66	0.542956	0.129868	1.54444e-05	0.000174775
CCR7	1114.94	1.48926	0.391961	1.54458e-05	0.000174775
PSMB4	2598.42	0.544284	0.130286	1.56167e-05	0.000176592
GPR31	8.53924	4.54287	1.16698	1.56826e-05	0.000177221
NTSR1	16.9903	3.25526	0.892529	1.5774e-05	0.000178137
LRRC75A	27.1469	-1.66846	0.445224	1.606e-05	0.000181027
CD1C	160.942	-1.4598	0.386448	1.60603e-05	0.000181027
CARS2	927.482	-0.641266	0.155699	1.60614e-05	0.000181027
PLXNB1	39.7803	1.8536	0.500245	1.62594e-05	0.000183139
TEX264	673.84	-0.605579	0.146536	1.63673e-05	0.000184234
RAB31	7643.67	0.462946	0.110307	1.67279e-05	0.00018817
FIGNL1	394.941	0.677283	0.165588	1.67915e-05	0.000188761
ENSG00000288954	61.1264	2.58033	0.717651	1.6913e-05	0.000189818
SIRPA	18714.7	0.460974	0.109239	1.69267e-05	0.000189818
HMOX1	3726.94	-0.96902	0.244556	1.69292e-05	0.000189818
CD14	20192.7	1.19896	0.312358	1.69296e-05	0.000189818
NUP62	2608.7	0.401466	0.0953271	1.69436e-05	0.000189852
BMF	1617.86	-1.417	0.3774	1.69608e-05	0.000189921
TMEM158	24.7948	1.9646	0.533148	1.698e-05	0.000190013
CUX1	3724.61	0.725165	0.178481	1.70336e-05	0.000190489
SFXN1	321.67	0.844505	0.210937	1.70536e-05	0.000190588
SPOCD1	601.515	-1.60335	0.431026	1.72639e-05	0.000192814
STX12	1904.06	0.521456	0.127369	1.73408e-05	0.000193547
NCF1B	223.003	1.74171	0.470229	1.74582e-05	0.000194732
STARD4	3307.23	0.753984	0.186577	1.75717e-05	0.000195871
TGFA	275.014	1.00989	0.258126	1.79201e-05	0.000199625
ABCA1	14040.4	1.19883	0.310335	1.79408e-05	0.000199726
FXYD5	2199.51	-0.540832	0.130441	1.81579e-05	0.000202013
CYP2U1	76.8412	-1.0533	0.271037	1.84511e-05	0.000205142
DNAJC3	6893.17	0.915592	0.231889	1.86243e-05	0.000206934
CYB561	173.536	-0.693202	0.17093	1.87353e-05	0.000208033
KDM7A-DT	93.278	1.24239	0.326147	1.88083e-05	0.00020871
SPACA6-AS1	4.20181	5.9785	2.58642	1.90789e-05	0.000211575
LGMNP1	17.4553	-1.95252	0.532159	1.91112e-05	0.000211797
NLRP3	293.135	0.624412	0.15285	1.93334e-05	0.000214122
TSHZ1	482.329	-0.780978	0.195242	1.94487e-05	0.00021526
MLH1	1608.16	0.522713	0.126534	2.00128e-05	0.000221362
SYT17	313.656	1.14481	0.299125	2.01478e-05	0.000222713
SPIRE1	1133.04	-0.748458	0.186835	2.03372e-05	0.000224662
KLHL2	1110.92	0.528591	0.128356	2.07982e-05	0.000229607
BRPF1	1126.77	-0.488416	0.118085	2.08348e-05	0.000229864
FNTB	87.6219	-0.863861	0.219109	2.10393e-05	0.000231972
FTH1P8	35.8543	1.45356	0.391491	2.1279e-05	0.000234464
ZBTB2	577.907	0.630434	0.155341	2.14104e-05	0.000235761
NOPCHAP1	338.492	0.596205	0.146276	2.14634e-05	0.000236194
PSAP	165394	-0.513727	0.12524	2.18911e-05	0.000240746
FADS2	7845.1	1.12981	0.296681	2.20206e-05	0.000241884
SHISAL1	7.41991	4.37074	1.13424	2.20227e-05	0.000241884
FUCA1	3695.48	-1.81647	0.503855	2.21652e-05	0.000243295
ENSG00000232884	18.4956	-2.4579	0.690049	2.2318e-05	0.000244816
ENSG00000278948	115.555	1.01192	0.262338	2.23977e-05	0.000245463
ADGRG3	14.8503	4.05959	1.14168	2.24056e-05	0.000245463
TSC22D3	1101.78	0.841813	0.214014	2.25475e-05	0.000246733
EPHB1	22.4339	-2.89878	0.824706	2.25501e-05	0.000246733
MILR1	2056.32	0.649158	0.160849	2.25845e-05	0.000246953
MAPK12	10.1988	-2.61318	0.719262	2.29759e-05	0.000251073
COL1A1	36.3797	3.24561	0.937152	2.30117e-05	0.000251305
ADARB1	1264.53	1.10605	0.290401	2.30974e-05	0.000252081
RPL23AP7	165.925	-0.829039	0.210787	2.32114e-05	0.000253164
FCGBP	10.5676	-4.70323	1.2305	2.32264e-05	0.000253168
CNGA1	4.65925	-5.9908	2.64627	2.33432e-05	0.00025428
GGT5	7.02341	6.75357	2.83317	2.39324e-05	0.000260534
HOMER3	250.666	-0.915501	0.236044	2.3984e-05	0.00026093
CNIH3-AS1	8.54277	7.04683	2.91955	2.40068e-05	0.000261013
RABGGTB	1812.55	0.470219	0.114344	2.41943e-05	0.000262885
TLNRD1	594.011	0.704822	0.176713	2.44342e-05	0.000265325
ETS1	1343.16	1.4142	0.381597	2.4552e-05	0.000266436
RHOBTB3	319.29	0.978374	0.254343	2.47641e-05	0.000268529
PAQR7	66.6268	-1.31804	0.355187	2.4776e-05	0.000268529
ENSG00000266378	5.94273	4.72906	1.48929	2.51175e-05	0.000272059
BEND3P2	8.09261	-3.81473	1.01223	2.51543e-05	0.000272286
WBP2	3558.79	0.668537	0.167205	2.54225e-05	0.000275017
HECW2	13.9209	2.83914	0.811589	2.54949e-05	0.000275627
RNASE2	127.1	1.89063	0.529279	2.55816e-05	0.00027639
ETNK2	44.4514	-2.43801	0.69796	2.5623e-05	0.000276664
SEZ6L	32.9971	-1.89964	0.532031	2.5978e-05	0.000280204
PTTG1IP	4494.97	0.501734	0.122935	2.59834e-05	0.000280204
HMMR	106.531	1.08681	0.28687	2.60172e-05	0.000280393
IL4I1	2366.83	1.06208	0.279818	2.61758e-05	0.000281926
FCGR1BP	128.141	1.6215	0.449221	2.66079e-05	0.000286401
MLC1	12.0035	-1.9088	0.525823	2.6631e-05	0.00028647
ETV5	685.032	2.65327	0.768788	2.69431e-05	0.000289647
STAG3	213.043	-1.06288	0.280992	2.71154e-05	0.000291318
NXT2	604.392	0.62017	0.154617	2.71999e-05	0.000292042
WDR47	611.938	0.455355	0.11135	2.72574e-05	0.000292303
BEST1	1268.34	0.791242	0.202087	2.72581e-05	0.000292303
NFE2L3	1009.11	1.4896	0.409473	2.73022e-05	0.000292594
ENSG00000279699	11.516	3.07467	0.872471	2.74183e-05	0.000293655
LPCAT4	347.746	-0.691912	0.174634	2.75627e-05	0.000295019
LINC00563	4.81186	4.43893	1.40988	2.80712e-05	0.000300275
FBLIM1	8.37028	-4.38922	1.14143	2.82737e-05	0.000302254
PREX1	5967.65	0.48655	0.119554	2.84672e-05	0.000304133
GPD1	42.5646	-1.49725	0.413407	2.90568e-05	0.00031024
CD2BP2-DT	93.9554	-1.10314	0.294177	2.91019e-05	0.000310529
OSBPL3	1424.53	-0.583399	0.145631	2.93932e-05	0.000313442
TAGLN2	4548.6	0.677249	0.171063	2.94981e-05	0.000314366
PRR11	332.974	-0.587967	0.147012	2.99213e-05	0.00031868
CRHBP	8.18969	-3.43107	0.939022	2.99496e-05	0.000318784
ECHDC1	2301.16	-0.604983	0.151643	3.00006e-05	0.000319129
LAMC1	508.77	1.90169	0.539884	3.00328e-05	0.000319275
PRAM1	2179.49	-0.869995	0.226265	3.01484e-05	0.000320305
H3-3B	8594.65	0.554845	0.138088	3.02238e-05	0.000320909
ITGA9-AS1	26.7318	-1.27802	0.346526	3.04947e-05	0.000323586
ENSG00000225107	140.002	4.48694	1.36613	3.0981e-05	0.000328543
ENSG00000290441	20.7962	1.9534	0.555407	3.10968e-05	0.000329569
UBE2S	129.05	0.777438	0.199857	3.14782e-05	0.000333406
RREB1	2570.92	-0.475251	0.117427	3.15411e-05	0.000333866
FLI1	2787.21	-0.53991	0.134472	3.16693e-05	0.000335018
CPLANE1	190.806	-0.7355	0.188411	3.19452e-05	0.000337729
SLC44A2	1475.35	-1.03098	0.274991	3.23423e-05	0.000341717
CTSL	20342	1.32149	0.356655	3.24038e-05	0.000342143
CDH23	692.399	-1.17438	0.318493	3.24223e-05	0.000342143
RAB34	821.743	0.822854	0.213478	3.26968e-05	0.000344828
ITGA5	5845.7	0.597729	0.1503	3.27235e-05	0.000344898
SLC8A1	6461.31	0.882453	0.230632	3.30269e-05	0.000347884
ALDH7A1	87.8265	-1.10205	0.296477	3.31161e-05	0.000348609
ALG2	1078.31	0.524804	0.130876	3.3314e-05	0.000350478
TWF1	633.301	0.447663	0.110632	3.34826e-05	0.000352038
FAM177A1	429.123	0.626113	0.158314	3.35248e-05	0.000352266
DNAJB12	1493.55	0.349297	0.0854403	3.36478e-05	0.000353343
ANO8	358.693	0.835023	0.217407	3.37454e-05	0.000354152
RAPGEF2	3311.21	0.697068	0.178059	3.37684e-05	0.000354178
MARK2	2038.4	0.492074	0.122316	3.38884e-05	0.000355219
CFP	130.554	1.67026	0.473212	3.41583e-05	0.000357832
IRAG2	1298.35	-0.929836	0.245787	3.42248e-05	0.00035831
PGM3	945.913	0.647808	0.164529	3.42535e-05	0.000358392
YPEL4	243.825	-1.34769	0.373464	3.46826e-05	0.000362661
CLEC4F	24.2756	-4.0669	1.21658	3.47412e-05	0.000363054
ELK3	1382.04	0.56104	0.141059	3.5417e-05	0.000369892
ITGA3	42.5771	-1.90292	0.54792	3.56943e-05	0.000372562
BLVRB	1213.02	-0.772645	0.20058	3.60124e-05	0.000375655
CCDC85B	60.6941	-1.01368	0.271437	3.62506e-05	0.000377911
ERG28	669.263	0.658226	0.167955	3.63027e-05	0.000378225
COL18A1	30.8137	-1.39821	0.388745	3.65045e-05	0.000380097
GK-IT1	12.039	2.93391	0.857341	3.6575e-05	0.000380601
NSUN3	604.623	0.450561	0.112178	3.7459e-05	0.000389564
MAOA	428.179	2.50722	0.743171	3.77008e-05	0.000391843
ZMIZ1-AS1	1876.94	0.475056	0.119017	3.92077e-05	0.000407211
LINC02913	68.1823	-1.492	0.422248	3.92267e-05	0.000407211
DISP2	15.527	-2.19106	0.636046	3.94377e-05	0.000409154
PHYH	303.051	-1.14169	0.312791	3.94961e-05	0.000409513
CCDC82	1749.84	0.580623	0.14709	3.99165e-05	0.000413623
FCGR3B	26.2206	1.4893	0.420355	4.01313e-05	0.000415599
ARHGEF3	1044.14	-0.713797	0.185031	4.0356e-05	0.000417675
RAB24	61.4914	0.912841	0.242903	4.04613e-05	0.000418513
HMGCR	7804.93	0.649708	0.166734	4.0534e-05	0.000419007
OTULINL	2105.97	-0.605904	0.154421	4.05577e-05	0.000419007
CD58	1212.9	0.661471	0.170157	4.0872e-05	0.000422001
ENSG00000291144	65.3252	-1.40512	0.395807	4.1023e-05	0.000423307
CCL17 (TARC)	8.97434	3.69025	1.0508	4.10875e-05	0.000423718
SBF2-AS1	262.674	-0.865295	0.229531	4.1371e-05	0.000426387
TNFSF8	518.095	-1.26747	0.353287	4.15716e-05	0.000428197
HADHA	6109.03	-0.520662	0.131743	4.19474e-05	0.000431576
ANKRD6	159.862	-0.86944	0.231075	4.19498e-05	0.000431576
NCKAP1	37.3851	1.35264	0.378831	4.20125e-05	0.000431964
ENSG00000274021	32.4515	-1.34719	0.37719	4.23092e-05	0.000434755
ETV6	4445.4	0.51919	0.131243	4.24248e-05	0.000435683
SBDS	728.581	0.434975	0.108892	4.28029e-05	0.000439304
LPP	3620.56	0.674231	0.17386	4.28623e-05	0.000439651
PLGRKT	593.846	0.85733	0.227598	4.31081e-05	0.000441719
ENSG00000235321	18.6389	-2.71489	0.808899	4.31151e-05	0.000441719
NKIRAS2	1176.84	0.410085	0.102408	4.3312e-05	0.000443472
CXCR2	37.7333	-2.56275	0.76916	4.35322e-05	0.000445461
ERLEC1	1527.48	0.623272	0.159729	4.37729e-05	0.000447659
ATOX1	758.799	0.53655	0.136658	4.47546e-05	0.000457427
ENSG00000279811	9.15434	-2.27663	0.654425	4.48812e-05	0.000458448
RAB40B	25.4812	-1.52342	0.43445	4.54563e-05	0.000463906
STX18	664.725	-0.438985	0.110394	4.54693e-05	0.000463906
RGS10	696.366	-0.622305	0.160424	4.57241e-05	0.000466229
SLC4A2	1599.24	0.516572	0.131226	4.62201e-05	0.000471007
EMP1	8711.57	-1.13173	0.315456	4.78112e-05	0.000486933
KLF4	204.918	-1.72453	0.504804	4.7907e-05	0.000487621
GHDC	545.879	-0.581334	0.149448	4.79462e-05	0.000487732
KCNAB1	132.298	-3.32935	1.03893	4.81024e-05	0.000489032
ST3GAL6-AS1	224.38	-1.26177	0.355422	4.82349e-05	0.000490089
TMEM123	7855.42	-0.452999	0.114511	4.82692e-05	0.000490149
CHDH	12.3299	2.8723	0.853922	4.86036e-05	0.000493085
FOXP4	400.825	0.757589	0.199861	4.86156e-05	0.000493085
ARID3B	215.7	0.927757	0.250903	4.91871e-05	0.000498588
BTBD2	522.941	-0.677759	0.177016	4.92575e-05	0.000499007
STK39	349.511	-0.986369	0.269451	4.94351e-05	0.000500512
SORT1	5696.38	-1.10445	0.305301	4.95712e-05	0.000501596
GBP1P1	29.2341	3.7096	1.15339	5.00281e-05	0.000505922
DCAF7	4083.74	-0.43265	0.109379	5.01854e-05	0.000507214
RAD23A	1984.96	0.491811	0.125301	5.02629e-05	0.0005077
IRF1	1877.89	1.20932	0.338555	5.03465e-05	0.000508245
ENSG00000250726	4.26596	-5.78258	2.65362	5.05659e-05	0.000510162
FGL2	5714.63	-1.31773	0.377148	5.06979e-05	0.000511193
PKM	51821.7	0.51063	0.129234	5.09403e-05	0.000513209
IGSF10	8.56176	-2.68207	0.780765	5.09573e-05	0.000513209
UNC13D	1371.36	0.510196	0.130295	5.09906e-05	0.000513244
MIR3142HG	332.361	1.15826	0.323517	5.10288e-05	0.000513328
CD163	23808.9	1.64553	0.476496	5.10713e-05	0.000513456
LINC02363	19.7809	-1.92756	0.569747	5.14983e-05	0.000517447
FNDC3A	3335.37	-0.446935	0.113426	5.19645e-05	0.000521827
ENSG00000258728	43.57	-1.07458	0.29745	5.23631e-05	0.000525523
LINC00641	246.297	0.779986	0.207633	5.2726e-05	0.000528857
WIPI1	967.817	1.186	0.334037	5.2949e-05	0.000530785
CELF2	3390.93	-0.458137	0.116567	5.31727e-05	0.000532717
UBASH3B	2946.15	-0.811324	0.217409	5.34134e-05	0.000534817
PXN	2420.01	0.733866	0.194446	5.35037e-05	0.00053541
KIF14	19.649	1.5246	0.439811	5.36462e-05	0.000536525
CSRP1	2106.2	0.457373	0.11639	5.37433e-05	0.000537183
FAM174A	97.2937	0.682814	0.179582	5.53501e-05	0.000552923
ENSG00000237422	5.99119	-4.51213	1.52287	5.54241e-05	0.000553206
NFIL3	1108.04	0.982893	0.270174	5.54426e-05	0.000553206
SMC6	1309.52	-0.577791	0.150308	5.59866e-05	0.00055831
RAB27A	1447.89	0.678977	0.178641	5.62646e-05	0.000560757
ENSG00000287216	6.89843	4.20264	1.18176	5.6371e-05	0.000561493
NPC2	9816.85	-0.391903	0.0993588	5.68168e-05	0.000565606
ENSG00000290041	46.6395	1.02035	0.282341	5.70137e-05	0.000567239
ACOX1	2589.97	0.526132	0.135468	5.74155e-05	0.000570906
ANKRD63	22.7875	-1.72357	0.507812	5.76344e-05	0.000572752
SLC11A2	3599.22	0.604981	0.157789	5.7842e-05	0.000574484
DHCR24	6687.62	0.940312	0.258224	5.81013e-05	0.000576726
SRPRA	4354.36	0.418471	0.106501	5.81761e-05	0.000577136
RIPK2-DT	220.221	1.24092	0.353714	5.90163e-05	0.000585135
CYBRD1	1533.77	-1.44696	0.424375	5.94536e-05	0.000589131
NOCT	78.7614	0.798366	0.214979	6.01163e-05	0.000595355
C20orf27	291.092	-0.982358	0.271959	6.0201e-05	0.000595852
RAPGEFL1	154.663	0.880023	0.240148	6.08888e-05	0.000602313
CRYZL2P	183.78	-1.03809	0.289994	6.16214e-05	0.00060921
STIM2	978.568	0.410839	0.104798	6.17924e-05	0.00061055
USP11	923.572	0.569333	0.14848	6.24693e-05	0.000616884
N4BP2	987.03	0.68698	0.182427	6.29136e-05	0.000620916
ARHGEF2	6427.59	0.329371	0.0835069	6.3107e-05	0.000622468
CHEK2	313.534	-0.638045	0.168407	6.33869e-05	0.000624871
PLAC8	155.905	1.22739	0.351173	6.37858e-05	0.000628443
TARS1	3316.49	0.711941	0.190033	6.38918e-05	0.000629128
FES	548.033	-0.810906	0.219969	6.43147e-05	0.00063293
SNHG12	637.177	-0.831766	0.226469	6.44445e-05	0.000633502
BCAP31	4931.11	-0.631573	0.166501	6.44464e-05	0.000633502
MAPKAPK2	3111.87	0.51547	0.133685	6.45828e-05	0.000634481
KIF13A	2083.93	0.542556	0.141416	6.55175e-05	0.000643297
EAF1	1694.93	0.479347	0.125247	6.62814e-05	0.000650426
GOLGA2	1940.72	0.473042	0.122278	6.68464e-05	0.000655597
SPATA12	42.2419	-1.96546	0.59931	6.69406e-05	0.000656147
ENTPD4	2688.48	0.573828	0.150407	6.70599e-05	0.000656942
TMEM68	442.501	0.519549	0.135179	6.71402e-05	0.000657355
CYB5R2	59.5056	2.08137	0.637469	6.72167e-05	0.00065773
SPINT2	546.146	0.597277	0.157161	6.73703e-05	0.000658859
ILDR1	8.6684	2.4777	0.745067	6.7851e-05	0.000663037
ENSG00000260256	12.2895	2.45606	0.750158	6.78745e-05	0.000663037
QPRT	61.2192	-1.12919	0.321284	6.8156e-05	0.00066541
TSPAN4	454.065	-0.924515	0.256506	6.90506e-05	0.000673761
PLOD2	12.3558	2.97867	0.919973	6.97293e-05	0.000679999
ENSG00000287863	7.68496	3.09172	0.930165	6.98855e-05	0.000681136
PDYN-AS1	3.67508	5.6482	2.61068	7.07149e-05	0.00068883
SCAMP5	8.46341	-2.64736	0.794255	7.0906e-05	0.000690302
SEC24A	1789.98	0.619116	0.164063	7.1564e-05	0.000696314
TOP1	3975.71	0.587956	0.154348	7.19463e-05	0.000699638
SELENOI	1185.21	0.655169	0.174648	7.21206e-05	0.000700937
SCARB1	1638.03	-1.04565	0.296237	7.24006e-05	0.000703262
MAN2A2	2462.33	-0.639046	0.17028	7.2659e-05	0.000705374
BBIP1	439.395	0.526906	0.138025	7.31569e-05	0.000709807
AMZ2	990.31	-0.455584	0.11832	7.38084e-05	0.000715725
RENBP	763.749	-0.508642	0.133054	7.39423e-05	0.00071662
DCP1A	1370.74	0.522797	0.13696	7.4212e-05	0.00071872
SH3BP1	682.331	0.637588	0.169523	7.42425e-05	0.00071872
ENSG00000287561	4.32167	5.89165	2.69463	7.42863e-05	0.000718741
ENSG00000290793	141.934	-0.778163	0.212405	7.53742e-05	0.000728857
SYT11	1834.28	0.733429	0.198821	7.66014e-05	0.000740309
DUSP1	627.771	1.03217	0.292652	7.67236e-05	0.000741074
MARCHF9	319.885	1.01549	0.287238	7.68716e-05	0.00074195
GNG7	77.6964	-1.39019	0.411535	7.69006e-05	0.00074195
SEC11A	2679.49	-0.483931	0.125712	7.70677e-05	0.000743147
TCF4	1928.89	0.567606	0.150103	7.75853e-05	0.000747719
CCDC153	24.9585	-1.45909	0.433486	7.78749e-05	0.000750091
ZNF491	21.8419	-1.5105	0.450264	7.84256e-05	0.000754973
ROBO3	105.229	-0.898088	0.250442	7.84924e-05	0.000755193
NBR1	6120.57	0.536647	0.140722	7.93479e-05	0.000762998
UAP1L1	1240.12	-0.73205	0.199314	8.02527e-05	0.000771268
TSPAN33	1435.62	0.727545	0.197892	8.13376e-05	0.000781258
SIGIRR	149.929	-0.99855	0.283466	8.1694e-05	0.000784244
NLRC5	1780.4	1.02895	0.293107	8.23202e-05	0.000789815
TLR1	2686.4	0.672202	0.181372	8.23838e-05	0.000789985
ENSG00000288658	22.5145	1.73357	0.529328	8.24931e-05	0.000790593
CABLES1	41.1384	-1.6847	0.514041	8.25726e-05	0.000790915
CLIP1	4219.43	0.575884	0.153122	8.27614e-05	0.000792263
UBQLN2	1425.1	0.393884	0.10178	8.28053e-05	0.000792263
ARHGEF12	1167.68	0.670431	0.180957	8.29061e-05	0.000792786
TNFRSF9	464.764	1.36018	0.402825	8.29671e-05	0.00079293
YBX1	17016.2	-0.557883	0.148061	8.31293e-05	0.000794039
FADS1	13498.4	1.20407	0.342555	8.35915e-05	0.000798011
RN7SL368P	55.6275	1.44881	0.433921	8.38407e-05	0.000799947
NCK1-DT	137.06	-0.727855	0.198778	8.43636e-05	0.000804491
RNASEH2B	1250.02	-0.521445	0.138252	8.51698e-05	0.000811729
PSMA1	586.403	0.667349	0.180417	8.56901e-05	0.000816237
ZSCAN20	358.796	0.677616	0.183562	8.60065e-05	0.000818797
TMEM26	13.9304	1.97928	0.611497	8.6396e-05	0.00082205
MRPS6	1416.24	0.528909	0.140148	8.65118e-05	0.000822698
SHISA5	1473.2	0.406652	0.105962	8.66568e-05	0.000823622
IL1R1	848.3	-1.02124	0.292518	8.67527e-05	0.000824079
USP35	167.539	0.633737	0.170609	8.6807e-05	0.00082414
CD300A	382.831	-0.959466	0.272279	8.6881e-05	0.000824389
SIGLEC17P	191.484	-1.42151	0.427269	8.69616e-05	0.000824516
ARMC10	84.0903	-0.701767	0.191091	8.69902e-05	0.000824516
FCGR1CP	39.1631	1.37548	0.409792	8.73923e-05	0.000827872
EIF3L	2748.69	-0.356442	0.092545	8.75794e-05	0.000829188
PRPF3	1642.17	0.639705	0.172455	8.84986e-05	0.00083743
ENSG00000250274	30.1098	2.03675	0.639526	8.88734e-05	0.000840515
ACSL5	2604.04	0.847041	0.236864	8.97079e-05	0.000847573
PIP4K2A	2814.52	-0.351704	0.0914348	8.97181e-05	0.000847573
ADM2	26.6144	1.76586	0.54445	9.08165e-05	0.000857479
TFDP1	1331.62	0.791625	0.219196	9.11818e-05	0.000860457
KCNMB3	41.4906	1.2803	0.37892	9.16229e-05	0.000864145
CCDC34	35.4586	-1.07704	0.310723	9.17524e-05	0.000864893
COL22A1	113.335	-1.3285	0.396873	9.20586e-05	0.000867305
ITGB1	11463.5	0.479057	0.126607	9.26743e-05	0.000872628
GCA	1753.44	0.626993	0.169246	9.27951e-05	0.000873288
LINC02733	7.31011	4.21773	1.26054	9.28891e-05	0.000873696
OSTM1	2527.95	0.492622	0.130411	9.30005e-05	0.000874265
ARF4	3203.18	0.694428	0.189962	9.33499e-05	0.000877072
TPST2	822.909	-0.678047	0.185101	9.43653e-05	0.000886128
RARA-AS1	19.9671	1.37435	0.410798	9.49305e-05	0.000890763
SRA1	771.364	0.597904	0.161035	9.49623e-05	0.000890763
MAPKAPK5-AS1	474.306	-0.703751	0.193013	9.51534e-05	0.00089207
ATP11C	1010.21	0.46838	0.123759	9.53393e-05	0.000893326
FAM131B-AS2	134.233	-0.931457	0.264907	9.57981e-05	0.000897137
TMC6	1537.15	-0.670098	0.18293	9.61206e-05	0.000899668
ENSG00000278989	7.43308	-2.91216	0.890243	9.68025e-05	0.000905079
ZNRF2	680.485	0.606771	0.163669	9.68526e-05	0.000905079
KLHL30	7.16147	-4.68304	1.66652	9.68564e-05	0.000905079
ADAMTS10	95.4225	-2.03044	0.645905	9.74334e-05	0.000909977
ZNF84	504.259	-0.523522	0.139755	9.7654e-05	0.000911053
TP53BP2	2037.31	0.414507	0.109262	9.76636e-05	0.000911053
DPEP3	10.3746	-2.28087	0.710964	9.77073e-05	0.000911053
BCAR3	425.713	-0.998942	0.28785	9.82397e-05	0.000915522
SGMS1	1299.73	0.600234	0.162181	9.90717e-05	0.000922776
SMAD3	405.284	-1.43134	0.436341	0.000100483	0.000935413
PALM2AKAP2	1150.42	0.636779	0.173112	0.000100994	0.000939663
BLCAP	1035.42	-0.468085	0.124096	0.000101203	0.000940984
KMO	1781.93	0.90362	0.256842	0.000101245	0.000940984
ST3GAL5	1874.56	-1.07107	0.312842	0.000101776	0.000945403
LINC01539	18.3004	1.39534	0.419962	0.000102078	0.000947702
LINC00607	77.9092	-2.12654	0.683234	0.000102438	0.000950534
NEDD9	335.972	-0.830547	0.234011	0.000103249	0.000957541
ENSG00000278330	162.532	-2.83193	0.942428	0.00010349	0.000959255
SPAG8	26.7498	-1.34788	0.40598	0.000104593	0.000968959
ZBED5-AS1	599.568	-0.695588	0.191862	0.000104705	0.00096948
ZFHX2	98.4022	0.76911	0.214588	0.000105048	0.000972131
GLUL	46766.7	0.551362	0.147836	0.000105447	0.000975302
POFUT1	1023.32	0.504929	0.134992	0.000105565	0.000975867
S100Z	12.0809	-2.49388	0.795237	0.000107081	0.000989349
PELI1	1245.54	0.691599	0.190747	0.000107379	0.000991572
ABAT	467.912	-0.926638	0.266026	0.000107854	0.000995246
SPI1	6221.36	0.310209	0.0811732	0.00010791	0.000995246
THAP8	62.0585	-0.807355	0.226979	0.00010795	0.000995246
KIAA1958	227.338	1.19921	0.357292	0.0001086	0.0010007
DNAJC10	5097.82	0.670672	0.184459	0.000108953	0.00100342
P2RY6	549.717	1.44642	0.443505	0.000109274	0.00100584
OR7E140P	7.37155	2.80085	0.874723	0.000110415	0.0010158
ZNF530	76.2172	-0.761439	0.213049	0.000110779	0.0010186
ZCCHC14	1082.27	-0.615778	0.168322	0.000110846	0.00101867
STXBP2	474.422	0.752917	0.210368	0.000111956	0.00102782
KDM2A	5756.77	0.293237	0.0767902	0.000111961	0.00102782
SLC29A1	538.858	-0.760895	0.21335	0.000112807	0.00103503
PLD3	11910.3	-0.876907	0.251643	0.000113086	0.00103704
CLDND1	1020.21	0.68518	0.189472	0.000113411	0.00103947
SPACA9	20.6987	-1.37771	0.418574	0.000113679	0.00104137
EZH2	635.967	0.766962	0.215103	0.000113787	0.0010418
MIER1	1743.46	0.572183	0.155289	0.000114125	0.00104435
ZNF331	808.657	-0.575	0.1565	0.000114468	0.00104693
TRMT5	635.15	-0.774712	0.218085	0.000115255	0.00105341
MIPEP	285.556	-0.668499	0.184749	0.000115299	0.00105341
BATF3	41.6808	1.84218	0.586063	0.000115823	0.00105763
SEC61A1	8567.49	0.481941	0.129174	0.000116339	0.00106179
LMAN1	3702.67	0.734346	0.20558	0.000119414	0.00108927
FRMD6	55.5677	-0.872526	0.249936	0.000119758	0.0010914
LIN7B	47.7488	-0.851441	0.242953	0.000119774	0.0010914
DTX3L	3651.3	0.638309	0.175878	0.000120188	0.00109459
SNX5	2821.45	-0.578873	0.158154	0.000120378	0.00109575
EPM2AIP1	1557.58	0.691216	0.192152	0.000120725	0.00109832
ZNF528	183.281	-0.646492	0.178715	0.00012115	0.00110093
MAF	2043.36	-0.81082	0.230544	0.000121163	0.00110093
AMN1	93.7443	0.720449	0.201347	0.000121203	0.00110093
UNG	178.237	-0.64294	0.177599	0.000121767	0.00110547
ENSG00000279267	34.5017	-1.05617	0.311401	0.000121976	0.00110678
RBMXL1	713.168	0.555014	0.151404	0.00012223	0.00110826
ENSG00000256894	23.3216	1.30903	0.396973	0.000122331	0.00110826
TMEM87B	2128.16	0.627475	0.172879	0.000122333	0.00110826
KPNB1-DT	31.852	1.04356	0.306903	0.000123121	0.00111482
CHIT1	93.7297	-1.38495	0.427135	0.0001232	0.00111495
ACOT9	2070.88	0.595345	0.163074	0.000123511	0.00111718
FABP7	4.22194	5.78878	2.73045	0.000125537	0.0011349
LRRFIP1P1	29.3996	1.28814	0.391862	0.000125684	0.00113564
KIF3B	1262.47	0.591924	0.162501	0.000126654	0.00114321
FPR3	8827.88	0.631941	0.174658	0.000126655	0.00114321
IL2RA	195.291	3.91269	1.376	0.000126872	0.00114457
TIAM1	2264.68	-0.825863	0.236164	0.00012721	0.00114702
DMWD	27.1461	1.38731	0.426316	0.000127276	0.00114702
ENSG00000279673	14.6064	2.32801	0.762368	0.000127601	0.00114934
CCNE1	40.54	-1.09	0.324047	0.000127755	0.00115013
PPP4R2	1919.27	0.712552	0.200052	0.000127899	0.00115083
PSMA3	1827.12	0.734277	0.206694	0.000128073	0.00115179
ENSG00000289851	6.18499	3.13036	0.966162	0.000129524	0.00116423
ARL13B	383.985	0.700946	0.196583	0.000131158	0.0011783
WWP1-AS1	13.0064	-2.05055	0.659369	0.000131653	0.00118213
C5orf15	1537.8	0.698527	0.195455	0.000131853	0.00118331
LACC1	3690.56	0.700729	0.197279	0.000132715	0.00119043
HADHB	3220.32	-0.49703	0.134893	0.000133656	0.00119824
ANKRD18A	6.9219	4.12573	1.27642	0.000134663	0.00120665
TIFA	327.741	1.01593	0.300746	0.000135898	0.00121708
TDRD7	1087.73	0.505477	0.137586	0.000136332	0.00122033
PIP5K1A	1232.07	0.419557	0.112817	0.000136735	0.0012233
HAAO	242.859	-0.925952	0.270955	0.000136971	0.00122478
HS1BP3	701.993	-0.372882	0.0998498	0.000137403	0.001228
SMIM2-AS1	29.6692	-1.8523	0.599798	0.000138117	0.00123374
ZCCHC24	144.075	-0.790013	0.226193	0.000139751	0.00124749
SMC5	1978.77	0.346985	0.0926548	0.000139801	0.00124749
UBL3	2161.25	0.454336	0.123093	0.000141481	0.00126183
MRC2	110.6	-1.68011	0.541063	0.000142358	0.00126899
TECPR2	578.838	0.579678	0.160224	0.000142919	0.00127333
PRDM8	26.0313	1.95863	0.639901	0.000143016	0.00127354
ALDH3A2	2053.58	-0.652331	0.182727	0.000143247	0.00127494
UBA3	1964.04	0.446071	0.12086	0.000144052	0.00128144
WIPI2	1799.16	-0.423971	0.114646	0.000144442	0.00128424
KLHL36	1544.24	-0.436012	0.118024	0.000144755	0.00128636
LINC01526	3.2616	-5.2562	2.6006	0.00014582	0.00129516
SAR1A	3572.26	0.711656	0.202597	0.000145965	0.00129578
WDR45P1	4.32866	4.09477	1.51742	0.000146112	0.00129642
CEP97	347.007	0.63558	0.177666	0.000146648	0.0013005
ENSG00000257258	7.30047	-2.62202	0.836174	0.000146931	0.00130234
ST6GALNAC6	899.748	-0.587022	0.163136	0.000149909	0.00132805
MIF4GD	366.239	-0.754067	0.215845	0.000150501	0.00133261
COG3	1149.94	0.405109	0.109518	0.000150792	0.0013345
LINC01095	9.90112	2.47971	0.814964	0.000150897	0.00133475
ENSG00000254325	11.8672	1.74805	0.558664	0.000152276	0.00134625
ZMIZ1	6977.23	-0.40693	0.110259	0.000153138	0.00135317
TPP1	16389.7	-0.428174	0.116188	0.000153437	0.00135513
ANTXR2	2510.11	0.714011	0.202977	0.000154686	0.00136528
GMFG	1235.56	-0.65453	0.184637	0.000154745	0.00136528
NMNAT2	34.8014	2.10211	0.699998	0.000157281	0.00138694
CD200R1	28.2049	-2.0343	0.675628	0.000157369	0.001387
LGALS2	1297.69	-1.11627	0.340036	0.000157903	0.001391
HDAC5	794.195	-0.668814	0.189289	0.000158137	0.00139235
SRPK1	1042.18	0.37889	0.102451	0.000158725	0.00139681
RTCA	1110.11	0.3619	0.0975594	0.000158874	0.00139741
ACOT2	155.747	-0.979913	0.292954	0.000159434	0.00140162
CMAS	781.708	0.512552	0.141354	0.000161025	0.00141488
UFD1	1316.75	0.427771	0.116276	0.000162927	0.00143087
SEMA3C	2287.75	0.846145	0.247332	0.000163061	0.00143107
AVIL	212.058	1.5971	0.516083	0.000163116	0.00143107
TTC7A	1464.18	-0.562923	0.156843	0.000163325	0.00143178
FCGR3A	7012.78	1.33245	0.41717	0.000163364	0.00143178
NLN	2318.79	-0.984415	0.295606	0.000165687	0.00145141
ADORA2B	92.8456	-1.82936	0.606192	0.00016612	0.00145446
RTL10	381.167	-0.63815	0.180379	0.000166862	0.00146021
SEC24D	3419.81	0.648777	0.18373	0.000169667	0.00148401
SRC	2986.89	0.646802	0.183241	0.000171335	0.00149783
ARL11	594.191	0.485301	0.133866	0.000171704	0.00150029
CCN3	27.8948	-1.77919	0.586166	0.00017205	0.00150255
SELENOM	18.8644	1.54019	0.495344	0.000173287	0.00151259
SQOR	1520.39	0.859594	0.253202	0.000173934	0.00151748
TOP1MT	329.904	-0.715496	0.205725	0.000174759	0.0015239
LRRFIP2	1306.84	0.483976	0.133702	0.000175314	0.00152796
RAB21	2462.59	0.56534	0.158352	0.000177769	0.00154858
CDC42SE1	7552.21	0.43927	0.120393	0.000178997	0.00155849
MPL	13.3301	-1.68433	0.545557	0.000179348	0.00156076
CYP2S1	797.218	0.699895	0.200923	0.0001799	0.00156373
CATIP	10.9427	2.37693	0.795601	0.000179925	0.00156373
IFFO2	217.764	0.558935	0.156549	0.000179962	0.00156373
TNK2-AS1	16.7223	-1.3879	0.439159	0.000180795	0.00157017
LIN54	860.858	0.614934	0.17407	0.000182134	0.001581
KANK1	537.467	1.33152	0.423114	0.000183446	0.00159159
CYSLTR1	328.117	-1.24375	0.391847	0.000183876	0.00159452
JRK	602.551	-0.563829	0.158542	0.000184588	0.00159989
DUT	449.293	-0.487705	0.13556	0.000186167	0.00161276
SCARB2	11316.6	-0.811145	0.238527	0.000187129	0.00162028
SCRN1	1189.02	0.455624	0.125991	0.000187451	0.00162216
ENSG00000226012	17.3397	2.65763	0.91309	0.000187535	0.00162216
ARAF	1484.33	0.373177	0.102179	0.000187692	0.00162248
HPS4	1271.47	-0.519006	0.145026	0.00018782	0.00162248
PTCH2	22.0563	-1.32662	0.419861	0.000187854	0.00162248
FHOD1	1314.04	0.52052	0.145445	0.000189605	0.00163678
TXNDC16	339.523	-0.818475	0.241692	0.000191223	0.00164992
AGTRAP	1050.22	0.746923	0.217763	0.000191738	0.00165353
TNKS1BP1	375.528	0.5821	0.164486	0.000192243	0.00165706
[truncated: 15,224 more rows]

## Sheet: Fig. 6A Right 
	Absolute gene count in two separate RNA-seq at two different vendors																Normalized by deividing theCT's mean value of respective blood donor
	RNA-seq analysis performed at the Cold Spring Harbor Laboratoies																RNA-seq analysis performed at the Cold Spring Harbor Laboratoies
		CT			HMGB!			HMGB! + P2-1 (5.0)			HMGB1 + P2-1 (10)				CT's Mean Value			CT			HMGB!			HMGB! + P2-1 (5.0)			HMGB1 + P2-1 (10)
	Blood Donor	A	B	C	A	B	C	A	B	C	A	B	C		(n = 3)		Blood Donor	A	B	C	A	B	C	A	B	C	A	B	C
	CCL2 (MCP-1)	568.087	412.242	190.564	19507.6	10186.7	12951.8	22131.4	7825.49	20821.8	20384.2	8731.65	13320.5		390.298		CCL2 (MCP-1)	1.45552	1.05622	0.488253	49.9814	26.0999	33.1843	56.7038	20.0501	53.3486	52.2273	22.3718	34.1291
	CCL7 (MCP-3)	57.2491	31.5543	29.3821	1197.98	1080.19	1157.31	1695.43	872.077	2063.94	1417.35	1021.7	1696.59		39.3952		CCL7 (MCP-3)	1.4532	0.800969	0.745831	30.4094	27.4194	29.3768	43.0364	22.1366	52.3906	35.9778	25.9347	43.0659
	CCL8 (MCP-2)	2.64227	3.05364	2.51847	83.3839	168.812	516.616	89.9089	138.256	714.606	105.714	119.723	945.733		2.73813		CCL8 (MCP-2)	0.964989	1.11523	0.919777	30.4529	61.6524	188.675	32.8359	50.4929	260.983	38.6081	43.7243	345.394
	CXCL1 (GRO-alpha)	24.6611	12.2146	26.0242	5543.45	9091	3025.89	5816.56	7996.62	6191.82	5608.72	10681.7	7830.67		20.9666		CXCL1 (GRO-alpha)	1.17621	0.582572	1.24122	264.394	433.594	144.32	277.42	381.397	295.318	267.507	509.462	373.482
	CXCL2 (GRO-beta)	116.26	215.791	183.009	1057.6	1660.16	834.287	911.933	1165.03	1309.39	812.432	1514.8	1844.47		171.686		CXCL2 (GRO-beta)	0.677163	1.25689	1.06595	6.16009	9.66972	4.85936	5.31162	6.78577	7.62665	4.73207	8.82305	10.7432
	CXCL5 (ENA78)	31.7072	29.5186	36.0981	51755	60596.3	24656.4	52412.3	47508.9	37098	49990	71833.7	60231.2		32.4413		CXCL5 (ENA78)	0.977372	0.909908	1.11272	1595.35	1867.88	760.032	1615.61	1464.46	1143.54	1540.94	2214.27	1856.62
	CXCL8 (IL-8)	660.566	761.375	897.415	32136.6	71580.5	47964	35514.9	67622.7	108329	33530	86708.7	177414		773.119		CXCL8 (IL-8)	0.854418	0.98481	1.16077	41.5675	92.5867	62.0396	45.9372	87.4674	140.119	43.3697	112.154	229.478
	IL-6	10.5691	0	6.71592	42.2197	210.238	49.2015	35.7801	112.152	212.655	46.0052	193.789	757.733		5.76166		IL-6	1.83438	0	1.16562	7.3277	36.4892	8.53947	6.21003	19.4652	36.9086	7.98471	33.6342	131.513
	Ctsl	12402.8	11523.4	8797.85	37905.9	26902.2	43151.9	29741.5	23988.9	26864.6	29702.7	22195.4	33387.2		10908		Ctsl	1.13703	1.05642	0.806548	3.47505	2.46628	3.95598	2.72657	2.1992	2.46283	2.72301	2.03478	3.0608
															--
	RNA-seq analysis performed at the GeneWiz																RNA-seq analysis performed at the GeneWiz
		CT			HMGB!			HMGB! + P2-1 (5.0)			HMGB1 + P2-1 (10)				CT's Mean			CT			HMGB!			HMGB! + P2-1 (5.0)			HMGB1 + P2-1 (10)
	Blood Donor	A	B	C	A	B	C	A	B	C	A	B	C		(n = 3)		Blood Donor	A	B	C	A	B	C	A	B	C	A	B	C
	CCL2 (MCP-1)	1154.98	770.009	579.468	48259	14708.4	25059.9	53694	12535.2	33974.5	49066.4	11160.9	23998.7		834.819		CCL2 (MCP-1)	1.38351	0.922366	0.694123	57.8077	17.6186	30.0183	64.3182	15.0155	40.6968	58.7748	13.3693	28.7472
	CCL7 (MCP-3)	145.249	53.4453	56.8636	2707.68	1829.14	2409.17	3781.35	1417.84	2912.42	3856.73	1217.21	2569.01		85.186		CCL7 (MCP-3)	1.70508	0.627395	0.667523	31.7855	21.4723	28.2812	44.3894	16.644	34.1889	45.2742	14.2888	30.1576
	CCL8 (MCP-2)	3.00515	5.93837	4.51299	249.712	422.643	812.795	143.121	176.796	1480.21	206.148	144.591	1131.66		4.4855		CCL8 (MCP-2)	0.669971	1.3239	1.00613	55.671	94.2243	181.205	31.9075	39.415	329.999	45.9588	32.2352	252.293
	CXCL1 (GRO-alpha)	94.1615	60.3734	90.2597	20312.4	10986.7	12453.6	15414.6	15968.3	9798.85	17613.8	16968.2	13295.5		81.5982		CXCL1 (GRO-alpha)	1.15397	0.739887	1.10615	248.932	134.644	152.62	188.909	195.694	120.087	215.86	207.948	162.938
	CXCL2 (GRO-beta)	274.471	623.529	559.61	3765.79	3245.54	4176.86	2603.81	2859.94	2511.67	2724.47	3080.83	3174.32		485.87		CXCL2 (GRO-beta)	0.564906	1.28332	1.15177	7.75061	6.67985	8.59667	5.35908	5.88622	5.16942	5.60741	6.34084	6.53326
	CXCL5 (ENA78)	297.51	59.3837	335.766	221574	108076	166748	177873	129100	63807.5	201661	149769	134343		230.887		CXCL5 (ENA78)	1.28856	0.257198	1.45425	959.666	468.09	722.206	770.389	559.151	276.358	873.418	648.668	581.855
	CXCL8 (IL-8)	1871.28	1543.02	2706.44	110588	153108	302362	106813	130595	158507	110588	153108	302362		2040.25		CXCL8 (IL-8)	0.917184	0.75629	1.32653	54.2031	75.0437	148.199	52.3528	64.0092	77.6903	54.2031	75.0437	148.199
	IL6	65.1117	22.7638	42.4221	177.761	116.796	276.244	136.212	214.929	173.026	121.203	245.71	847.226		43.4325		IL6	1.49915	0.524118	0.976736	4.09281	2.68914	6.36031	3.13617	4.94857	3.98379	2.7906	5.65728	19.5067
	Ctsl	24044.2	21234.6	16790.1	75584.5	56484.7	90524.4	56847.6	43227.2	48871.4	63121.7	42530.5	60134.8		20689.7		Ctsl	1.16214	1.02634	0.811522	3.65325	2.73009	4.37534	2.74764	2.08932	2.36212	3.05088	2.05564	2.90652
																		Ctsl
																		CT	HMGB1	H + P2 (5)	H + P2 (10)
																		1.13703	3.65325	2.72657	2.72301
																		1.05642	2.73009	2.1992	2.03478
																		0.80655	4.37534	2.46283	3.0608
																		1.16214	3.47505	2.74764	3.05088
																		1.02634	2.46628	2.08932	2.05564
																		0.81152	3.95598	2.36212	2.90652
																		CCL2 (MCP-1)
																		CT	HMGB1	H + P2 (5)	H + P2 (10)
																		1.38351	49.9814	56.7038	52.2273
																		0.92237	26.0999	20.05	22.3718
																		0.69412	33.1843	53.3486	34.1291
																		1.45552	57.8077	64.3182	58.7749
																		1.05622	17.6186	15.0155	13.3692
																		0.48825	30.0183	40.6968	28.7472
																		CCL7 (MCP-3)
																		CT	HMGB1	H + P2 (5)	H + P2 (10)
																		1.4532	30.4094	43.0364	35.9778
																		0.800969	27.4194	22.1366	25.9347
																		0.745831	29.3768	52.3906	43.0659
																		1.70508	31.7855	44.3894	45.2742
																		0.627395	21.4723	16.644	14.2888
																		0.667523	28.2812	34.1889	30.1576
																		CCL8 (MCP-2)
																		CT	HMGB1	H + P2 (5)	H + P2 (10)
																		0.964989	30.4529	32.8359	38.6081
																		1.11523	61.6524	50.4929	43.7243
																		0.919777	188.675	260.983	345.394
																		0.669971	55.671	31.9075	45.9588
																		1.3239	94.2243	39.415	32.2352
																		1.00613	181.205	329.999	252.293
																		CXCL1 (GRO-alpha)
																		CT	HMGB1	H + P2 (5)	H + P2 (10)
																		1.17621	264.394	277.42	267.507
																		0.582572	433.594	381.397	509.462
																		1.24122	144.32	295.318	373.482
																		1.15397	248.932	188.909	215.86
																		0.739887	134.644	195.694	207.948
																		1.10615	152.62	120.087	162.938
																		IL-6
																		CT	HMGB1	H + P2 (5)	H + P2 (10)
																		1.83438	4.09281	6.21003	7.98471
																		0	2.68914	19.4652	33.6342
																		1.16562	6.36031	36.9086	31.5129
																		1.49915	7.3277	3.13617	2.7906
																		0.524118	36.4892	4.94857	5.65728
																		0.976736	8.53947	3.98379	19.5067
																		CXCL8 (IL-8)
																		CT	HMGB1	H + P2 (5)	H + P2 (10)
																		0.854418	41.5675	45.9372	43.3697
																		0.98481	92.5867	87.4674	112.154
																		1.16077	62.0396	140.119	229.478
																		0.917184	54.2031	52.3528	54.2031
																		0.75629	75.0437	64.0092	75.0437
																		1.32653	148.199	77.6903	148.199
																		CXCL5 (ENA78)
																		CT	HMGB1	H + P2 (5)	H + P2 (10)
																		1.28856	959.666	770.389	873.418
																		0.257198	468.09	559.151	648.668
																		1.45425	722.206	276.358	581.855
																		0.977372	1595.35	1615.61	1540.94
																		0.909908	1867.88	1464.46	2214.27
																		1.11272	760.032	1143.54	1856.62

## Sheet: Fig. 6C
			Effect of P2-1 on HMGB1-induced pCTS-L release in human PBMCs
			pCTS-L Release
			Control	HMGB1 (2.0)	HMGB1 + P2-1 (5)	HMGB1 + P2-1 (10)
			1.9	13.2	4.8	1.6
			pCTS-L Release
			Control	HMGB1 (0.5)	HMGB1 + P2-1 (5)	HMGB1 + P2-1 (10)
			1.5	8.3	1.2	0.4
			1.3	13.8	4	0.7
			2.2	11.3	3.2	1.9
			0.1	14.1	2.1	1.1

## Sheet: Fig. 7B
		Effect of mAb2 on CAIA-induced pain response (Vor Frey Score) Female
		Normal	CAIA (Day 6)	CAIA Day 6)	CAIA (Day 10)	CAIA + P2-1 (day 10)
		1.15	0.08	0.11	0.14	0.31
		1.27	0.11	0.21	0.14	0.96
		0.82	0.26	0.16	0.11	0.32
		0.97	0.45	1.19	0.44	0.44
		1.04	0.11	0.37	0.04	0.57
						P = 0.04443 vs Veh

## Sheet: Fig. 7C
		Effect of anti-pCTS-L mAb2 (1.0 mg/kg) on CAIA-induced arthritis (Female, 6/13/2023)													Effect of anti-pCTS-L mAb2 (1.0 mg/kg) on CAIA-induced arthritis (Male)
		Days	CAIA + mAb2 (1.0 mg/kg)					CAIA + VEH							Days	CAIA + mAb2 (1.0 mg/kg)					CAIA + VEH
			M2	M3	M4	M5	M6	M1	M7	M8	M9					M2	M3	M4	M5	M6	M1	M7	M8	M9
		0		0	0	0	0	0	0	0	0	0			0	0	0	0	0	0	0	0	0	0	0
		1		0	0	0	0	0	0	0	0	0			1	0	0	0	0	0	0	0	0	0	0
		2		0	0	0	0	0	0	0	0	0			2	0	0	0	0	0	0	0	0	0	0
		3		0	0	0	0	0	0	0	0	0			3	0	0	0	0	0	0	0	0	0	0
		4		0	0	0	0	0	0	0	0	0			4	0	0	0	0	0	0	0	0	0	0
		5		0	0	0	0	0	0	0	0	0			5	0	0	0	0	0	0	0	0	0	0
		6		2	2	3	1	6	11	8	3	5			6	9	8	9	10	8	8	10	8	9	9
		7		12	6	12	8	8	16	14	9	13			7	10	8	9	10	8	8	10	6	7	10
		8		12	10	12	8	12	16	14	9	13			8	11	7	8	13	7	7	11	5	7	10
		9		13	12	13	7	11	15	13	12	13			9	10	7	8	13	7	7	11	4	7	10
		10		13	12	13	11	12	14	14	12	13			10	10	7	8	13	7	7	10	4	6	10
		11		13	12	12	11	13	14	14	12	13			11
		12		13	12	12	10	11	14	14	14	12			12
		13		12	11	10	10	8	11	12	11	11			13
		Effect of anti-pCTS-L mAb2 (2.0 mg/kg) on CAIA-induced arthritis (Male, 12/12/2023)													Effect of anti-pCTS-L mAb2 (2.0 mg/kg) on CAIA-induced arthritis (Female, 8/1/2023)
		Days	CAIA + mAb2 (2.0 mg/kg)					CAIA + VEH							Days	CAIA + mAb2				CAIA + VEH
			M1	M3	M4	M5	M9	M2	M6	M7	M8	M10				M3	M4	M5	M6	M1	M7	M8	M9
		0	0	0	0	0	0	0	0	0	0	0			0	0	0	0	0	0	0	0	0
		1	0	0	0	0	0	0	0	0	0	0			1	0	0	0	0	0	0	0	0
		2	0	0	0	0	0	0	0	0	0	0			2	0	0	0	0	0	0	0	0
		3	0	0	0	0	0	0	0	0	0	0			3	0	0	0	0	0	0	0	0
		4	0	0	0	0	0	0	0	0	0	0			4	0	0	0	0	0	0	0	0
		5	1	0	2	1	0	0	0	0	0	1			5	1	0	0	0	0	0	0	0
		6	6	6	6	7	10	6	8	7	8	4			6	4	2	6	1	3	5	3	1
		7	6	7	9	8	10	7	8	8	10	4			7	7	3	6	2	10	8	5	2
		8	6	6	8	7	11	8	8	8	11	6			8	9	5	7	2	13	9	5	3
		9	6	5	8	7	7	8	8	8	10	6	P = 0.10274		9	8	5	7	2	13	9	5	3
		10													10	8	4	7	2	13	9	5	3
		11													11	5	3	6	1	12	9	5	3
		12													12	5	2	5	1	12	9	4	3
		13													13	5	2	5	1	11	8	3	3
		Effect of anti-pCTS-L mAb2 (4.0 mg/kg) on CAIA-induced arthritis (Male, 4/2/2024)													Effect of anti-pCTS-L mAb2 (4.0 mg/kg) on CAIA-induced arthritis (Male, 7/8/2025)
		Days	CAIA + mAb2 (4.0 mg/kg)					CAIA + VEH							Days	CAIA + mAb2 (4.0 mg/kg)					CAIA + VEH
			M1	M2	M4	M6	M10	M3	M5	M8	M9					M1	M2	M4	M6	M10	M3	M5	M7	M8
		0	0	0	0	0	0	0	0	0	0				0	0	0	0	0	0	0	0	0	0
		1	0	0	0	0	0	0	0	0	0				1	0	0	0	0	0	0	0	0	0
		2	0	0	0	0	0	0	0	0	0				2	0	0	0	0	0	0	0	0	0
		3	0	0	0	0	0	0	0	0	0				3	0	0	0	0	0	0	0	0	0
		4	0	0	0	0	0	0	0	0	0				4	0	0	0	0	0	0	0	0	0
		5	0	0	0	2	0	1	1	1	2				5	0	0	1	1	0	1	0	0	1
		6	4	6	8	9	6	6	8	9	7				6	4	4	5	2	3	4	4	3	4
		7	4	6	9	9	6	8	10	10	9				7	6	4	5	3	3	5	5	4	6
		8	2	4	6	6	5	7	11	11	8				8	6	4	5	4	3	5	8	4	6
		9	2	4	8	10	4	7	12	11	12				9	4	2	3	3	3	5	8	4	6
		10	2	4	7	8	4	8	13	11	12	P = 0.04814			10	4	2	3	3	3	5	8	4	6	P = 0.01745
		Effect of anti-pCTS-L mAb2 (4.0 mg/kg) on CAIA-induced arthritis (Female, 7/29/2025)
		Days	CAIA + mAb2 (4.0 mg/kg)					CAIA + VEH
			M1	M4	M5	M6	M9	M2	M3	M7	M8	M10
		0	0	0	0	0	0	0	0	0	0	0
		1	0	0	0	0	0	0	0	0	0	0
		2	0	0	0	0	0	0	0	0	0	0
		3	0	0	0	0	0	0	0	0	0	0
		4	0	0	0	0	0	0	0	0	0	0
		5	0	2	0	0	1	1	1	1	1	0
		6	6	7	2	7	5	6	8	6	4	9	P = 0.4578
		7	8	7	3	9	7	7	11	9	7	9	P = 0.229
		8	10	9	4	10	6	10	13	11	10	11	P = 0.023
		9	8	9	2	9	6	10	14	11	10	11	P = 0.00841

## Sheet: Fig. 7D
			Effect of mAbs on CAIA-induced inflammation
			IL-1α
			Control	CAIA	CAIA + pCTS-L mAb
			2.7	5.7	2.5
			2.8	4.3	2.6
			3.4	5.4	1.1
			3.5	5.5	0.9
				7.5	1.6
				7.4	1.5
				3	1.5
				3.1	1.3
			KC
			Control	CAIA	CAIA + pCTS-L mAb
			0	0.18	0.05
			0	0.13	0
			0	0.28	0
			0	0.19	0
				0.33	0
				0.34	0
				0	0
				0	0
			LIX
			Control	CAIA	CAIA + pCTS-L mAb
			9.3	13.7	8.9
			8.1	14.4	9.8
			10.7	19.7	5.7
			9.3	23.5	8.2
				15.2	5.2
				17.2	5.6
				10.3	6.5
				13.2	8.4
			MIP-3alpha
			Control	CAIA	CAIA + pCTS-L mAb
			0	0.76	0.15
			0	0.85	0.03
			0	1.19	0.13
			0	1.37	0.08
				1.44	0.08
				1.7	0.09
				0.17	0.03
				0.21	0.04
			MIP-3beta
			Control	CAIA	CAIA + pCTS-L mAb
			0.08	0.6	0.28
			0	1.01	0.15
			0	0.92	0.07
			0	0.98	0.15
				1.44	0.23
				1.58	0.23
				0.25	0.01
				0.32	0.06
			PF-4
			Control	CAIA	CAIA + pCTS-L mAb
			5.72	13.05	5.38
			5.24	13.88	4.73
			5.84	16.26	5.82
			4.76	15.31	4.63
				19.8	3.65
				20.13	3.34
				12.5	4.62
				12.35	4.76
			VCAM-1
			Control	CAIA	CAIA + pCTS-L mAb
			0.019	4.78	1.06
			0.15	2.71	1.06
			0	4.42	1.11
			0	4.11	1.48
				6.85	1.35
				6.56	1.17
				1.87	0.88
				1.96	1.89
			P-selectin
			Control	CAIA	CAIA + pCTS-L mAb
			4.11	12.59	6.03
			3.3	13.4	5.38
			3.2	17.92	7.05
			4.11	15.1	6.74
				17.67	4.29
				18.52	4.04
				12.52	4.44
				12.35	4.4
			sTNFRI
			Control	CAIA	CAIA + pCTS-L mAb
			2.2	17.4	6.8
			2.1	16.9	5.6
			0.3	11.5	6.8
			0.1	10.7	7.3
				17.6	8.1
				17.7	8.3
				8.2	6.2
				7.1	5.9
					P= 0.00325
			sTNFRII
			Control	CAIA	CAIA + pCTS-L mAb
			1.1	1.8	0.79
			0.9	1.6	1.6
			0.5	3.1	0.9
			0.1	2.8	1.04
				1.3	0.7
				1.4	0.9
				2.3	1.6
				2.2	0.7
					P= 0.0044

[truncated: 1 more sheets: Fig. 8B]
